# Supplementary material for: α-Arylsulfonyloxyacrylates: attractive O-centered electrophiles for synthesis of α-substituted acrylates via Pd-catalysed Suzuki reactions
Source: Royal Society of Chemistry journal article supplement (doi:10.1039/d3ra00401e), 2023-01-01

# Supporting Information for

## **$\alpha$ -Arylsulfonyloxyacrylates: attractive *O*-centered electrophiles for synthesis of $\alpha$ -substituted acrylates via Pd-catalysed Suzuki reactions**

Zhongya Zhang, Li Zhang, Linge Huai, Zhentao Wang and Yewen Fang

---

## Table of Contents

|                                                                                                      |     |
|------------------------------------------------------------------------------------------------------|-----|
| 1 General Information .....                                                                          | S2  |
| 1.1 Solvents, Reagents, and Starting Materials .....                                                 | S2  |
| 1.2 Instruments .....                                                                                | S2  |
| 2 General Procedure of Synthesis of $\alpha$ -Arylsulfonyloxyacrylates .....                         | S3  |
| 3 General Procedure of Suzuki Reaction .....                                                         | S7  |
| 3.1 General Procedure of the (Hetero)arylation Reactions of $\alpha$ -Arylsulfonyloxyacrylates ..... | S7  |
| 3.2 General Procedure of the Alkylation Reactions of $\alpha$ -Arylsulfonyloxyacrylates .....        | S17 |
| 4 References .....                                                                                   | S19 |
| 5 NMR Spectra of New Compounds .....                                                                 | S20 |

---

# 1 General Information

## 1.1 Solvents, Reagents, and Starting Materials

All reactions were carried out under an atmosphere of nitrogen in oven-dried glassware. The  $\alpha$ -ketoesters are commercially available or prepared following literature known methods.<sup>1</sup> The potassium (hetero)aryltrifluoroborates were reported by our previous work or prepared according to the literature procedures.<sup>2</sup> The employed phosphorus ligands are commercially available. The dried solvents were obtained from commercial sources and used without further purification unless otherwise noted.

## 1.2 Instruments

NMR spectra were recorded on a BrukerAvance 500 spectrometer (500 MHz) (500 MHz for <sup>1</sup>H NMR, 126 MHz for <sup>13</sup>C NMR, and 471 MHz for <sup>19</sup>F NMR). Chemical shifts were reported in ppm downfield from tetramethylsilane and calibrated using residue undeuterated solvent (Chloroform-*d* at 7.26 ppm <sup>1</sup>H NMR; 77.0 ppm <sup>13</sup>C NMR). Spectra were reported as follows: chemical shift ( $\delta$  ppm), multiplicity (s = singlet, d = doublet, t = triplet, q = quartet, m = multiplet, br = broad). Coupling constants are reported in Hertz where available. High resolution mass spectra (HRMS) were recorded on Waters Premier GC-TOF MS, Waters G2-Xs QTOF MS, and JEOL-AccuTOF-GCv4G-GCT MS. Analytical thin layer chromatography was performed on Polygram SIL G/UV254 plates. Visualization was accomplished with short wave UV light, or KMnO<sub>4</sub> staining solutions. Flash column chromatography was performed using silica gel (300-400 mesh) with solvents to use.

## 2 General Procedure of Synthesis of $\alpha$ -Arylsulfonyloxyacrylates

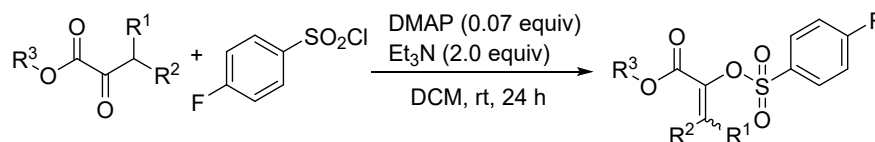

A mixture of  $\alpha$ -ketoester (15 mmol, 1.0 equiv), *p*-fluorosulfonyl chloride (3.5 g, 18 mmol), DMAP (134.5 mg, 1.1 mmol) was dissolved in dichloromethane (30 mL). Triethylamine (4.1 mL, 29.5 mmol) was added dropwise and reacted for 24 h. At the end of the reaction, the mixture was then quenched with  $\text{H}_2\text{O}$  (20 mL). The organic phase was separated and the aqueous phase extracted with ethyl acetate (3 x 15 mL). The combined organic phase was dried by  $\text{MgSO}_4$  and the solvent removed *in vacuo*. Crude products were purified by silica gel column chromatography.

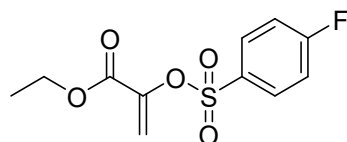

**1a**

**Ethyl 2-(((4-fluorophenyl)sulfonyl)oxy)acrylate (1a).** Flash column chromatography to afford product **1a** as a yellow liquid.  $^1\text{H}$  NMR (500 MHz,  $\text{CDCl}_3$ )  $\delta$  7.93 – 7.86 (m, 2H), 7.18 (t,  $J$  = 8.6 Hz, 2H), 6.08 (d,  $J$  = 2.5 Hz, 1H), 5.57 (d,  $J$  = 2.5 Hz, 1H), 4.06 (q,  $J$  = 7.2 Hz, 2H), 1.12 (t,  $J$  = 7.2 Hz, 3H).  $^{13}\text{C}$  NMR (126 MHz,  $\text{CDCl}_3$ )  $\delta$  165.7 (d,  $J$  = 258.3 Hz), 160.3, 142.8, 131.3 (d,  $J$  = 2.5 Hz), 131.2 (d,  $J$  = 10.1 Hz), 116.9, 116.2 (d,  $J$  = 22.7 Hz), 61.7, 13.5.  $^{19}\text{F}$  NMR (471 MHz,  $\text{CDCl}_3$ )  $\delta$  -102.16. HRMS (ESI)  $[\text{M}+\text{Na}]^+$ : calculated for  $\text{C}_{11}\text{H}_{11}\text{FO}_5\text{SNa}$ : 297.0209, found 297.0210.

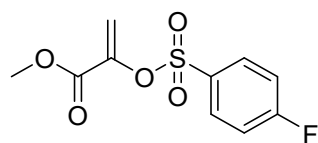

**1d**

**Methyl 2-(((4-fluorophenyl)sulfonyl)oxy)acrylate (1d).** Flash column chromatography to afford product **1d** as a yellow liquid.  $^1\text{H}$  NMR (500 MHz,  $\text{CDCl}_3$ )  $\delta$  7.99 – 7.91 (m, 2H), 7.22 (t,  $J$  = 8.5 Hz, 2H), 6.13 (d,  $J$  = 2.5 Hz, 1H), 5.64 (d,  $J$  = 2.6 Hz, 1H), 3.67 (s, 3H).  $^{13}\text{C}$  NMR (126 MHz,  $\text{CDCl}_3$ )  $\delta$  166.0 (d,  $J$  = 258.3 Hz), 161.1, 142.7, 131.4 (d,  $J$  = 2.5 Hz), 131.3 (d,  $J$  = 10.1 Hz), 117.40, 116.4 (d,  $J$  = 25.2 Hz), 52.6.  $^{19}\text{F}$  NMR (471 MHz,  $\text{CDCl}_3$ )  $\delta$  -101.82. HRMS (ESI)  $[\text{M}+\text{Na}]^+$ : calculated for  $\text{C}_{10}\text{H}_9\text{FO}_5\text{SNa}$ : 283.0052, found 283.0059.

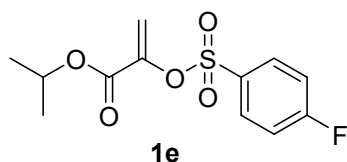

**Isopropyl 2-(((4-fluorophenyl)sulfonyl)oxy)acrylate (1e).** Flash column chromatography to afford product **1e** as a yellow liquid.  $^1\text{H}$  NMR (500 MHz,  $\text{CDCl}_3$ )  $\delta$  8.06 – 7.85 (m, 2H), 7.38 – 7.09 (m, 2H), 6.15 (s, 1H), 5.68 (d,  $J = 2.3$  Hz, 1H), 4.99 (p,  $J = 6.3$  Hz, 1H), 1.21 (d,  $J = 6.4$  Hz, 6H).  $^{13}\text{C}$  NMR (126 MHz,  $\text{CDCl}_3$ )  $\delta$  166.1 (d,  $J = 258.3$  Hz), 160.2, 143.4, 131.8 (d,  $J = 2.5$  Hz), 131.5 (d,  $J = 10.1$  Hz), 117.0, 116.5 (d,  $J = 23.9$  Hz), 70.2, 21.5.  $^{19}\text{F}$  NMR (471 MHz,  $\text{CDCl}_3$ )  $\delta$  -102.0. HRMS (ESI)  $[\text{M}+\text{Na}]^+$ : calculated for  $\text{C}_{12}\text{H}_{13}\text{FO}_5\text{SNa}$ : 311.0362, found 311.0364.

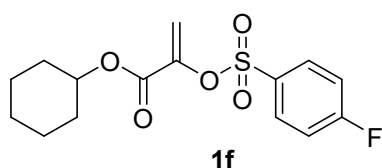

**Cyclohexyl 2-(((4-fluorophenyl)sulfonyl)oxy)acrylate (1f).** Flash column chromatography to afford product **1f** as a yellow liquid.  $^1\text{H}$  NMR (500 MHz,  $\text{CDCl}_3$ )  $\delta$  8.08 – 7.97 (m, 2H), 7.26 – 7.21 (m, 2H), 6.15 (d,  $J = 2.3$  Hz, 1H), 5.66 (d,  $J = 2.3$  Hz, 1H), 4.80 – 4.74 (m, 1H), 1.80 – 1.67 (m, 4H), 1.54 – 1.49 (m, 1H), 1.43 – 1.24 (m, 5H).  $^{13}\text{C}$  NMR (126 MHz,  $\text{CDCl}_3$ )  $\delta$  166.1 (d,  $J = 257.0$  Hz), 160.1, 143.4, 131.7 (d,  $J = 2.5$  Hz), 131.4 (d,  $J = 10.1$  Hz), 116.9, 116.5 (d,  $J = 25.2$  Hz), 74.8, 31.2, 25.2, 23.4.  $^{19}\text{F}$  NMR (471 MHz,  $\text{CDCl}_3$ )  $\delta$  -102.02. HRMS (ESI)  $[\text{M}+\text{Na}]^+$ : calculated for  $\text{C}_{15}\text{H}_{17}\text{FO}_5\text{S Na}$ : 351.0678, found 351.0685.

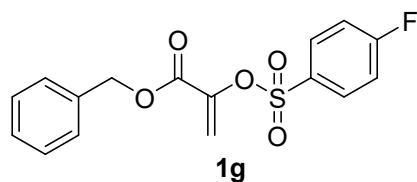

**Benzyl 2-(((4-fluorophenyl)sulfonyl)oxy)acrylate (1g).** Flash column chromatography to afford product **1g** as a yellow liquid.  $^1\text{H}$  NMR (500 MHz,  $\text{CDCl}_3$ )  $\delta$  7.93 – 7.90 (m, 2H), 7.38 – 7.35 (m, 3H), 7.30 – 7.26 (m, 2H), 7.10 (t,  $J = 8.5$  Hz, 2H), 6.23 (d,  $J = 2.3$  Hz, 1H), 5.76 (d,  $J = 2.4$  Hz, 1H), 5.13 (s, 2H).  $^{13}\text{C}$  NMR (126 MHz,  $\text{CDCl}_3$ )  $\delta$  165.9 (d,  $J = 258.3$  Hz), 160.6, 142.8, 134.7, 131.4 (d,  $J = 8.8$  Hz), 131.3 (d,  $J = 3.8$  Hz), 128.6, 128.5, 128.4, 117.9, 116.4 (d,  $J = 25.2$  Hz), 67.7.  $^{19}\text{F}$  NMR (471 MHz,  $\text{CDCl}_3$ )  $\delta$  -101.64. HRMS (ESI)  $[\text{M}+\text{Na}]^+$ : calculated for  $\text{C}_{16}\text{H}_{13}\text{FO}_5\text{S Na}$ : 359.0365, found 359.0368.

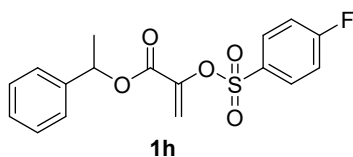

**1-Phenylethyl 2-(((4-fluorophenyl)sulfonyl)oxy)acrylate (1h).** Flash column chromatography to afford product **1h** as a colorless liquid.  $^1\text{H}$  NMR (500 MHz,  $\text{CDCl}_3$ )  $\delta$  7.94 – 7.85 (m, 2H), 7.41 – 7.26 (m, 5H), 7.19 – 7.06 (m, 2H), 6.22 (d,  $J = 2.4$  Hz, 1H), 5.85 (q,  $J = 6.6$  Hz, 1H), 5.74 (d,  $J = 2.4$  Hz, 1H), 1.53 (d,  $J = 6.6$  Hz, 3H).  $^{13}\text{C}$  NMR (126 MHz,  $\text{CDCl}_3$ )  $\delta$  165.9 (d,  $J = 258.3$  Hz), 159.9, 143.1, 140.4, 131.4 (d,  $J = 3.8$  Hz), 131.3 (d,  $J = 10.1$  Hz), 128.5, 128.2, 126.1, 117.5, 116.4 (d,  $J = 22.7$  Hz), 74.6, 21.8.  $^{19}\text{F}$  NMR (471 MHz,  $\text{CDCl}_3$ )  $\delta$  -101.73. HRMS (ESI)  $[\text{M}+\text{Na}]^+$ : calculated for  $\text{C}_{17}\text{H}_{15}\text{FO}_5\text{SNa}$ : 373.0522, found 373.0526.

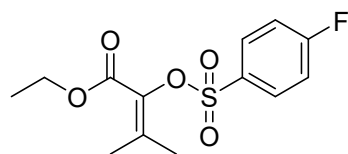

**4a**

**Ethyl 2-(((4-fluorophenyl)sulfonyl)oxy)-3-methylbut-2-enoate (4a).** Flash column chromatography to afford product **4a** as a colorless liquid.  $^1\text{H}$  NMR (500 MHz,  $\text{CDCl}_3$ )  $\delta$  8.01 – 7.99 (m, 2H), 7.24 (t,  $J = 8.5$  Hz, 2H), 4.10 (q,  $J = 7.1$  Hz, 2H), 2.18 (s, 3H), 1.82 (s, 3H), 1.20 (t,  $J = 7.2$  Hz, 3H).  $^{13}\text{C}$  NMR (126 MHz,  $\text{CDCl}_3$ )  $\delta$  165.8 (d,  $J = 257.0$  Hz), 162.0, 144.5, 132.9, 132.8 (d,  $J = 13.8$  Hz), 131.1 (d,  $J = 8.8$  Hz), 116.3 (d,  $J = 25.2$  Hz), 61.1, 21.3, 20.4, 13.9.  $^{19}\text{F}$  NMR (471 MHz,  $\text{CDCl}_3$ )  $\delta$  -102.73. HRMS (ESI)  $[\text{M}+\text{Na}]^+$ : calculated for  $\text{C}_{13}\text{H}_{15}\text{FO}_5\text{SNa}$ : 325.0522, found 325.0524.

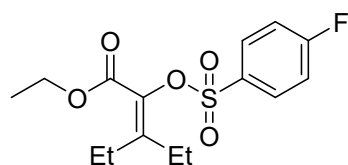

**4b**

**Ethyl 3-ethyl-2-(((4-fluorophenyl)sulfonyl)oxy)pent-2-enoate (4b).** Flash column chromatography to afford product **4b** as a colorless liquid.  $^1\text{H}$  NMR (500 MHz,  $\text{CDCl}_3$ )  $\delta$  8.01 – 7.97 (m, 2H), 7.25 – 7.20 (m, 2H), 4.11 (q,  $J = 7.1$  Hz, 2H), 2.50 (q,  $J = 7.5$  Hz, 2H), 2.15 (q,  $J = 7.6$  Hz, 2H), 1.21 (t,  $J = 7.1$  Hz, 3H), 1.09 (t,  $J = 7.5$  Hz, 3H), 0.97 (t,  $J = 7.6$  Hz, 3H).  $^{13}\text{C}$  NMR (126 MHz,  $\text{CDCl}_3$ )  $\delta$  165.8 (d,  $J = 258.3$  Hz), 162.1, 153.8, 132.7 (d,  $J = 3.8$  Hz), 132.4, 131.1 (d,  $J = 8.8$  Hz), 116.3 (d,  $J = 25.2$  Hz), 61.2, 24.6, 23.9, 13.9, 12.9, 11.6.  $^{19}\text{F}$  NMR (471 MHz,  $\text{CDCl}_3$ )  $\delta$  -102.76. HRMS (ESI)  $[\text{M}+\text{H}]^+$ : calculated for  $\text{C}_{15}\text{H}_{19}\text{FO}_5\text{S}$ : 331.1015, found 331.1002.

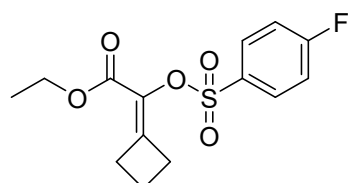

**4c**

**Ethyl 2-cyclobutylidene-2-(((4-fluorophenyl)sulfonyl)oxy)acetate (4c).** Flash column chromatography to afford product **4c** as a yellow liquid.  $^1\text{H}$  NMR (500 MHz,  $\text{CDCl}_3$ )  $\delta$  7.96 – 7.93 (m, 2H), 7.26 – 7.14 (m, 2H), 4.01 (q,  $J = 7.1$  Hz, 2H), 3.07 – 3.03 (m, 2H), 2.78 – 2.74 (m, 2H), 1.98 (p,  $J = 7.9$  Hz, 2H), 1.11 (t,  $J = 7.2$  Hz, 3H).  $^{13}\text{C}$  NMR (126 MHz,  $\text{CDCl}_3$ )  $\delta$  165.6 (d,  $J = 257.0$  Hz), 161.2, 156.4, 132.4 (d,  $J = 2.5$  Hz), 131.1 (d,  $J = 10.1$  Hz), 129.5, 116.0 (d,  $J = 22.7$  Hz), 60.8, 31.4, 29.7, 16.8, 13.8.  $^{19}\text{F}$  NMR (471 MHz,  $\text{CDCl}_3$ )  $\delta$  -102.88. HRMS (ESI)  $[\text{M}+\text{Na}]^+$ : calculated for  $\text{C}_{14}\text{H}_{15}\text{FO}_5\text{SNa}$ : 337.0522, found 337.0523.

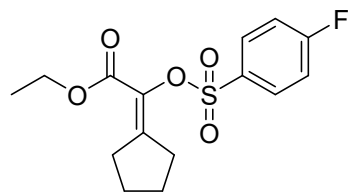

**4d**

**Ethyl 2-cyclopentylidene-2-(((4-fluorophenyl)sulfonyl)oxy)acetate (4d).** Flash column chromatography to afford product **4d** as a yellow liquid.  $^1\text{H}$  NMR (500 MHz,  $\text{CDCl}_3$ )  $\delta$  8.01 – 7.98 (m, 2H), 7.23 – 7.18 (m, 2H), 4.05 (t,  $J = 7.1$  Hz, 2H), 2.81 – 2.76 (m, 2H), 2.57 – 2.53 (m, 2H), 1.75 (p,  $J = 6.9$  Hz, 2H), 1.64 (q,  $J = 7.1$  Hz, 2H), 1.15 (t,  $J = 7.1$  Hz, 3H).  $^{13}\text{C}$  NMR (126 MHz,  $\text{CDCl}_3$ )  $\delta$  165.7 (d,  $J = 257.0$  Hz), 161.8, 158.2, 133.1 (d,  $J = 3.8$  Hz), 133.1 (d,  $J = 10.1$  Hz), 130.2, 116.2 (d,  $J = 22.7$  Hz), 60.9, 33.4, 32.7, 26.6, 25.4, 13.9.  $^{19}\text{F}$  NMR (471 MHz,  $\text{CDCl}_3$ )  $\delta$  -103.03. HRMS (ESI)  $[\text{M}+\text{Na}]^+$ : calculated for  $\text{C}_{15}\text{H}_{17}\text{FO}_5\text{SNa}$ : 351.0678, found 351.0679.

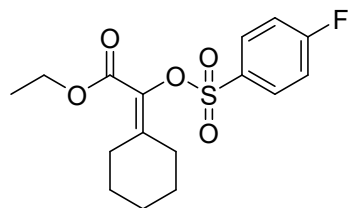

**4e**

**Ethyl 2-cyclohexylidene-2-(((4-fluorophenyl)sulfonyl)oxy)acetate (4e).** Flash column chromatography to afford product **4e** as a white solid.  $^1\text{H}$  NMR (500 MHz,  $\text{CDCl}_3$ )  $\delta$  7.99 – 7.92 (m, 2H), 7.24 – 7.18 (m, 2H), 4.07 (q,  $J = 7.1$  Hz, 2H), 2.72 – 2.66 (m, 2H), 2.17 (m,  $J = 6.8$ , 5.1 Hz, 2H), 1.60 (p,  $J = 5.7$  Hz, 2H), 1.55 – 1.44 (m, 4H), 1.18 (t,  $J = 7.1$  Hz, 3H).  $^{13}\text{C}$  NMR (126 MHz,  $\text{CDCl}_3$ )  $\delta$  165.8 (d,  $J = 258.3$  Hz), 162.2, 150.1, 132.5 (d,  $J = 3.8$  Hz), 131.1 (d,  $J = 8.8$  Hz), 130.0, 116.3 (d,  $J = 25.2$  Hz), 61.1, 30.0, 29.5, 27.5, 27.1, 25.7, 13.8.  $^{19}\text{F}$  NMR (471 MHz,  $\text{CDCl}_3$ )  $\delta$  -102.71. HRMS (ESI)  $[\text{M}+\text{Na}]^+$ : calculated for  $\text{C}_{16}\text{H}_{19}\text{FO}_5\text{SNa}$ : 365.0835, found 365.0833.

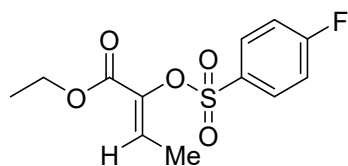

**6**

**Ethyl (Z)-2-(((4-fluorophenyl)sulfonyl)oxy)but-2-enoate (6).** Flash column chromatography to afford product **6** as a yellow liquid.  $^1\text{H}$  NMR (500 MHz,  $\text{CDCl}_3$ )  $\delta$  8.00 – 7.97 (m, 2H), 7.22 – 7.17 (m, 2H), 6.76 – 6.72 (m, 1H), 4.08 (q,  $J = 7.1$  Hz, 2H), 1.75 (d,  $J = 7.3$  Hz, 3H), 1.15 (t,  $J = 7.1$  Hz, 3H).  $^{13}\text{C}$  NMR (126 MHz,  $\text{CDCl}_3$ )  $\delta$  165.8 (d,  $J = 258.3$  Hz), 161.2, 138.0,

132.4 (d,  $J = 2.5$  Hz), 131.6, 131.1 (d,  $J = 10.1$  Hz), 116.2 (d,  $J = 25.2$  Hz), 61.4, 13.8, 12.2.  $^{19}\text{F}$  NMR (471 MHz,  $\text{CDCl}_3$ )  $\delta$  -102.56. HRMS (ESI)  $[\text{M}+\text{Na}]^+$ : calculated for  $\text{C}_{12}\text{H}_{13}\text{FO}_5\text{SNa}$ : 311.0365, found 311.0372.

## 3 General Procedure of Suzuki Reaction

### 3.1 General Procedure of the (Hetero)arylation Reactions of $\alpha$ -Arylsulfonyloxyacrylates

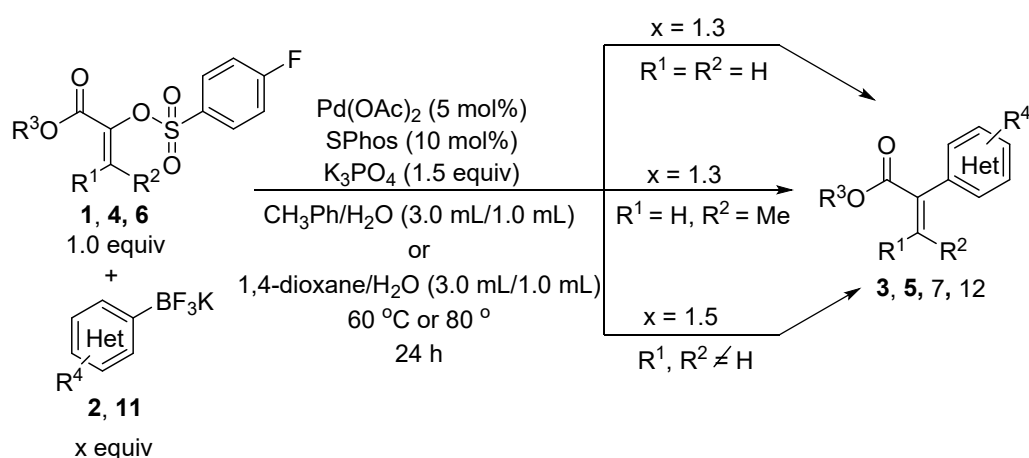

To a reaction tube equipped with a magnetic bar were added  $\alpha$ -arylsulfonyloxyacrylate **1**, **4** or **6** (0.2 mmol), potassium (hetero)aryltrifluoroborate **2** or **11** (0.26 mmol or 0.3 mmol), SPhos (8.2 mg, 0.02 mmol),  $\text{K}_3\text{PO}_4$  (63.6 mg, 0.3 mmol),  $\text{Pd}(\text{OAc})_2$  (2.3 mg, 0.01 mmol). The toluene or 1,4-dioxane (3.0 mL) and  $\text{H}_2\text{O}$  (1.0 mL) were added subsequently. The reaction mixture was stirred at 60 °C or 80 °C for 24 h. The reaction was allowed to cool to room temperature, diluted with water (10 mL) and extracted with ethyl acetate ( $3 \times 10$  mL). The organic phase was dried with  $\text{MgSO}_4$  and concentrated *in vacuo*. The crude product was purified by silica gel column chromatography to afford the product.

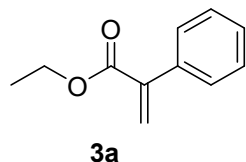

**Ethyl 2-phenylacrylate (3a).** Flash column chromatography to afford product **3a** as a yellow liquid (25.7 mg, 73% yield).  $^1\text{H}$  NMR (500 MHz,  $\text{CDCl}_3$ )  $\delta$  7.44 – 7.42 (m, 2H), 7.37-7.34 (m, 3H), 6.35 (d,  $J = 1.3$  Hz, 1H), 5.89 (d,  $J = 1.2$  Hz, 1H), 4.30 (q,  $J = 7.1$  Hz, 2H), 1.34 (t,  $J = 7.1$  Hz, 3H).  $^{13}\text{C}$  NMR (126 MHz,  $\text{CDCl}_3$ )  $\delta$  166.8, 141.6, 136.8, 128.3, 128.0(9), 128.0(5), 126.4, 61.1, 14.2. These data are consistent with the published literature.<sup>3</sup>



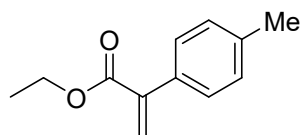

**3b**

**Ethyl 2-(*p*-tolyl)acrylate (3b).** Flash column chromatography to afford product **3b** as a colorless liquid (28.2 mg, 74% yield).  $^1\text{H}$  NMR (500 MHz,  $\text{CDCl}_3$ )  $\delta$  7.32-7.31 (m, 2H), 7.17 (d,  $J = 7.8$  Hz, 2H), 6.30 (d,  $J = 1.3$  Hz, 1H), 5.86 (d,  $J = 1.3$  Hz, 1H), 4.29 (q,  $J = 7.1$  Hz, 2H), 2.37 (s, 3H), 1.34 (t,  $J = 7.1$  Hz, 3H).  $^{13}\text{C}$  NMR (126 MHz,  $\text{CDCl}_3$ )  $\delta$  167.0, 141.4, 138.0, 133.9, 128.8, 128.1, 125.7, 61.0, 21.2, 14.2. These data are consistent with the published literature.<sup>4</sup>

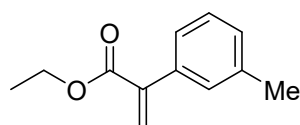

**3c**

**Ethyl 2-(*m*-tolyl)acrylate (3c).** Flash column chromatography to afford product **3c** as a colorless liquid (20.9 mg, 55% yield).  $^1\text{H}$  NMR (500 MHz,  $\text{CDCl}_3$ )  $\delta$  7.26 – 7.20 (m, 3H), 7.16 – 7.13 (m, 1H), 6.31 (d,  $J = 1.3$  Hz, 1H), 5.86 (d,  $J = 1.3$  Hz, 1H), 4.29 (q,  $J = 7.1$  Hz, 2H), 2.37 (s, 3H), 1.33 (t,  $J = 7.1$  Hz, 3H).  $^{13}\text{C}$  NMR (126 MHz,  $\text{CDCl}_3$ )  $\delta$  166.9, 141.7, 137.7, 136.7, 128.9, 128.7, 127.9, 126.2, 125.4, 61.1, 21.4, 14.2. These data are consistent with the published literature.<sup>4</sup>

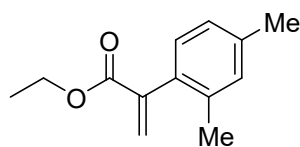

**3d**

**Ethyl 2-(2,4-dimethylphenyl)acrylate (3d).** Flash column chromatography to afford product **3d** as a colorless liquid (28.6 mg, 70% yield).  $^1\text{H}$  NMR (500 MHz,  $\text{CDCl}_3$ )  $\delta$  7.04 – 6.99 (m, 3H), 6.47 (d,  $J = 1.8$  Hz, 1H), 5.67 (d,  $J = 1.8$  Hz, 1H), 4.24 (q,  $J = 7.1$  Hz, 2H), 2.33 (s, 3H), 2.17 (s, 3H), 1.28 (t,  $J = 7.1$  Hz, 3H).  $^{13}\text{C}$  NMR (126 MHz,  $\text{CDCl}_3$ )  $\delta$  166.8, 142.0, 137.8, 135.9, 134.5, 130.7, 129.4, 128.0, 126.3, 60.9, 21.1, 19.8, 14.2. HRMS (ESI)  $[\text{M}+\text{Na}]^+$ : calculated for  $\text{C}_{13}\text{H}_{16}\text{O}_2\text{Na}$ : 227.1048, found 227.1049.

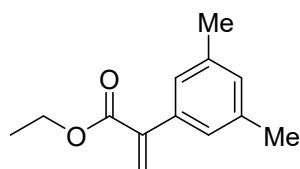

**3e**

**Ethyl 2-(3,5-dimethylphenyl)acrylate (3e).** Flash column chromatography to afford product **3e** as a yellow liquid (32.7 mg, 80% yield).  $^1\text{H}$  NMR (500 MHz,  $\text{CDCl}_3$ )  $\delta$  7.01 (d,  $J = 25.1$  Hz, 3H), 6.29 (d,  $J = 1.4$  Hz, 1H), 5.85 (d,  $J = 1.3$  Hz, 1H), 4.29 (q,  $J = 7.1$  Hz, 2H), 2.33 (s, 6H), 1.34 (t,  $J$

= 7.1 Hz, 3H).  $^{13}\text{C}$  NMR (126 MHz,  $\text{CDCl}_3$ )  $\delta$  167.0, 141.8, 137.6, 136.7, 129.8, 126.1, 125.9, 61.0, 21.3, 14.2. This compound was reported in the published literature.<sup>1b</sup>

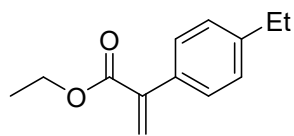

**3f**

**Ethyl 2-(4-ethylphenyl)acrylate (3f).** Flash column chromatography to afford product **3f** as a yellow liquid (23.7 mg, 58% yield).  $^1\text{H}$  NMR (500 MHz,  $\text{CDCl}_3$ )  $\delta$  7.38 – 7.34 (m, 2H), 7.20 (d,  $J$  = 8.0 Hz, 2H), 6.30 (d,  $J$  = 1.3 Hz, 1H), 5.87 (d,  $J$  = 1.3 Hz, 1H), 4.30 (q,  $J$  = 7.1 Hz, 2H), 2.67 (q,  $J$  = 7.7 Hz, 2H), 1.34 (t,  $J$  = 7.2 Hz, 3H), 1.25 (t,  $J$  = 7.6 Hz, 3H).  $^{13}\text{C}$  NMR (126 MHz,  $\text{CDCl}_3$ )  $\delta$  167.0, 144.3, 141.4, 134.1, 128.2, 127.6, 125.7, 61.0, 28.6, 15.4, 14.2. This compound was reported in the published literature.<sup>5</sup>

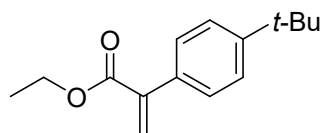

**3g**

**Ethyl 2-(4-*tert*-butylphenyl)acrylate (3g).** Flash column chromatography to afford product **3g** as a colorless liquid (38.6 mg, 83% yield).  $^1\text{H}$  NMR (500 MHz,  $\text{CDCl}_3$ )  $\delta$  7.39 (s, 4H), 6.31 (d,  $J$  = 1.4 Hz, 1H), 5.89 (d,  $J$  = 1.3 Hz, 1H), 4.31 (q,  $J$  = 7.2 Hz, 2H), 1.35 (t,  $J$  = 7.0 Hz, 3H), 1.34 (s, 9H).  $^{13}\text{C}$  NMR (126 MHz,  $\text{CDCl}_3$ )  $\delta$  167.0, 151.1, 141.3, 133.8, 128.0, 125.7, 125.0, 61.0, 34.6, 31.3, 14.2. This compound was reported in the published literature.<sup>1b</sup>

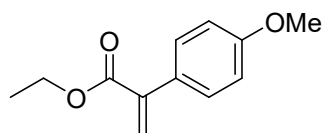

**3h**

**Ethyl 2-(4-methoxyphenyl)acrylate (3h).** Flash column chromatography to afford product **3h** as a colorless liquid (24.7 mg, 60% yield).  $^1\text{H}$  NMR (500 MHz,  $\text{CDCl}_3$ )  $\delta$  7.39 – 7.32 (m, 2H), 6.90 – 6.87 (m, 2H), 6.25 (d,  $J$  = 1.2 Hz, 1H), 5.82 (d,  $J$  = 1.2 Hz, 1H), 4.29 (q,  $J$  = 7.1 Hz, 2H), 3.82 (s, 3H), 1.33 (t,  $J$  = 7.1 Hz, 3H).  $^{13}\text{C}$  NMR (126 MHz,  $\text{CDCl}_3$ )  $\delta$  167.1, 159.6, 140.9, 129.5, 129.2, 124.9, 113.5, 61.0, 55.3, 14.2. These data are consistent with the published literature.<sup>6</sup>

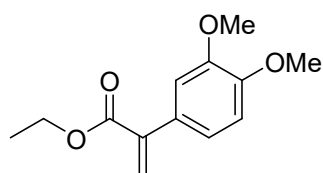

**3i**

**Ethyl 2-(3,4-dimethoxyphenyl)acrylate (3i).** Flash column chromatography to afford product **3i** as a yellow liquid (30.2 mg, 64% yield).  $^1\text{H}$  NMR (500 MHz,  $\text{CDCl}_3$ )  $\delta$  7.01-6.99 (m, 2H), 6.85 (d,

$J = 6.7$  Hz, 1H), 6.26 (d,  $J = 1.2$  Hz, 1H), 5.84 (d,  $J = 1.3$  Hz, 1H), 4.29 (q,  $J = 7.1$  Hz, 2H), 3.89 (s, 6H), 1.34 (t,  $J = 7.1$  Hz, 3H).  $^{13}\text{C}$  NMR (126 MHz,  $\text{CDCl}_3$ )  $\delta$  167.0, 149.1, 148.4, 141.0, 129.5, 125.2, 120.9, 111.6, 110.7, 61.0, 55.9, 55.8, 14.2. This compound was reported in the published literature.<sup>7</sup>

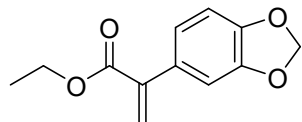

**3j**

**Ethyl 2-(benzo[d][1,3]dioxol-5-yl)acrylate (3j).** Flash column chromatography to afford product **3j** as a yellow liquid (33.0 mg, 75% yield).  $^1\text{H}$  NMR (500 MHz,  $\text{CDCl}_3$ )  $\delta$  6.95 – 6.87 (m, 2H), 6.79 (d,  $J = 8.0$  Hz, 1H), 6.25 (s, 1H), 5.97 (s, 2H), 5.81 (s, 1H), 4.28 (q,  $J = 7.1$  Hz, 2H), 1.33 (t,  $J = 7.1$  Hz, 3H).  $^{13}\text{C}$  NMR (126 MHz,  $\text{CDCl}_3$ )  $\delta$  166.9, 147.6, 147.4, 141.0, 130.8, 125.5, 122.1, 108.9, 107.9, 101.1, 61.1, 14.2. These data are consistent with the published literature.<sup>8</sup>

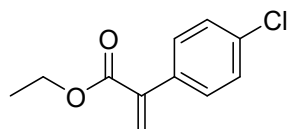

**3k**

**Ethyl 2-(4-chlorophenyl)acrylate (3k).** Flash column chromatography to afford product **3k** as a yellow liquid (22.7 mg, 54% yield).  $^1\text{H}$  NMR (500 MHz,  $\text{CDCl}_3$ )  $\delta$  7.39 – 7.30 (m, 4H), 6.37 (d,  $J = 1.1$  Hz, 1H), 5.89 (d,  $J = 1.1$  Hz, 1H), 4.29 (q,  $J = 7.1$  Hz, 2H), 1.33 (t,  $J = 7.1$  Hz, 3H).  $^{13}\text{C}$  NMR (126 MHz,  $\text{CDCl}_3$ )  $\delta$  166.4, 140.4, 135.2, 134.2, 129.7, 128.3, 126.9, 61.2, 14.2. These data are consistent with the published literature.<sup>4</sup>

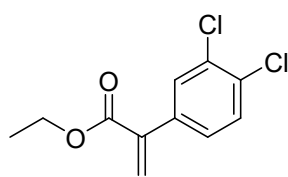

**3l**

**Ethyl 2-(3,4-dichlorophenyl)acrylate (3l).** Flash column chromatography to afford product **3l** as a yellow liquid (15.2 mg, 31% yield).  $^1\text{H}$  NMR (500 MHz,  $\text{CDCl}_3$ )  $\delta$  7.54 (d,  $J = 2.1$  Hz, 1H), 7.42 (d,  $J = 8.4$  Hz, 1H), 7.28 – 7.26 (m, 1H), 6.41 (d,  $J = 0.9$  Hz, 1H), 5.92 (d,  $J = 1.0$  Hz, 1H), 4.29 (q,  $J = 7.1$  Hz, 2H), 1.33 (t,  $J = 7.1$  Hz, 3H).  $^{13}\text{C}$  NMR (126 MHz,  $\text{CDCl}_3$ )  $\delta$  166.0, 139.4, 136.7, 132.3, 132.2, 130.3, 130.0, 128.0, 127.7, 61.4, 14.2. These data are consistent with the published literature.<sup>9</sup>

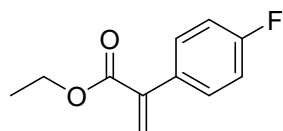

**3m**

**Ethyl 2-(4-fluorophenyl)acrylate (3m).** Flash column chromatography to afford product **3m** as a yellow liquid (15.1 mg, 39% yield).  $^1\text{H}$  NMR (500 MHz,  $\text{CDCl}_3$ )  $\delta$  7.41 – 7.37 (m, 2H), 7.06 – 7.02 (m, 2H), 6.35 (d,  $J = 1.2$  Hz, 1H), 5.86 (d,  $J = 1.2$  Hz, 1H), 4.29 (q,  $J = 7.1$  Hz, 2H), 1.34 (d,  $J = 7.1$  Hz, 3H).  $^{13}\text{C}$  NMR (126 MHz,  $\text{CDCl}_3$ )  $\delta$  166.6, 162.7 (d,  $J = 252$  Hz), 140.5, 132.8 (d,  $J = 2.5$  Hz), 130.1 (d,  $J = 8.8$  Hz), 126.5, 115.1 (d,  $J = 21.4$  Hz), 61.2, 14.2.  $^{19}\text{F}$  NMR (471 MHz,  $\text{CDCl}_3$ )  $\delta$  -113.95. These data are consistent with the published literature.<sup>6</sup>

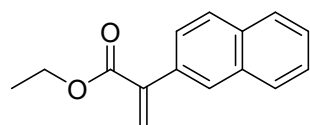

**3n**

**Ethyl 2-(naphthalen-2-yl)acrylate (3n).** Flash column chromatography to afford product **3n** as a yellow liquid (23.5 mg, 52% yield).  $^1\text{H}$  NMR (500 MHz,  $\text{CDCl}_3$ )  $\delta$  7.93 (d,  $J = 1.8$  Hz, 1H), 7.88 – 7.80 (m, 3H), 7.59–7.54 (m, 1H), 7.50–7.48 (m, 2H), 6.44 (d,  $J = 1.2$  Hz, 1H), 6.02 (d,  $J = 1.2$  Hz, 1H), 4.34 (q,  $J = 7.1$  Hz, 2H), 1.39 – 1.34 (t,  $J = 7.5$  Hz, 3H).  $^{13}\text{C}$  NMR (126 MHz,  $\text{CDCl}_3$ )  $\delta$  166.9, 141.6, 134.2, 133.1, 132.9, 128.3, 127.6, 127.5, 127.4, 126.7, 126.3, 126.2, 126.1, 61.2, 14.2. These data are consistent with the published literature.<sup>10</sup>

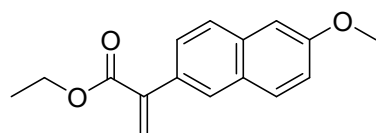

**3o**

**Ethyl 2-(6-methoxynaphthalen-2-yl)acrylate (3o).** Flash column chromatography to afford product **3o** as a white solid (31.3 mg, 61% yield).  $^1\text{H}$  NMR (500 MHz,  $\text{CDCl}_3$ )  $\delta$  7.85 (d,  $J = 1.8$  Hz, 1H), 7.75 – 7.69 (m, 2H), 7.53 – 7.50 (m, 1H), 7.17 – 7.10 (m, 2H), 6.38 (s, 1H), 5.98 (s, 1H), 4.33 (q,  $J = 7.2$  Hz, 2H), 3.93 (s, 3H), 1.35 (t,  $J = 7.1$  Hz, 3H).  $^{13}\text{C}$  NMR (126 MHz,  $\text{CDCl}_3$ )  $\delta$  167.1, 158.0, 141.5, 134.2, 131.9, 129.8, 128.5, 127.3, 126.6, 126.4, 125.9, 119.0, 105.5, 61.1, 55.3, 14.2. These data are consistent with the published literature.<sup>4</sup>

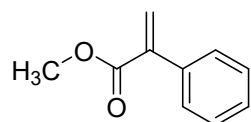

**3p**

**Methyl 2-phenylacrylate (3p).** Flash column chromatography to afford product **3p** as a colorless liquid (27.2 mg, 84% yield).  $^1\text{H}$  NMR (500 MHz,  $\text{CDCl}_3$ )  $\delta$  7.44 – 7.40 (m, 2H), 7.39 – 7.34 (m,

3H), 6.37 (s, 1H), 5.90 (s, 1H), 3.83 (s, 3H). <sup>13</sup>C NMR (126 MHz, CDCl<sub>3</sub>) δ 167.3, 141.3, 136.7, 128.3, 128.2, 128.1, 127.0, 52.2. These data are consistent with the published literature.<sup>3</sup>

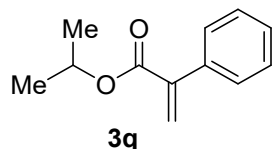

**Iso-propyl 2-phenylacrylate (3q).** Flash column chromatography to afford product **3q** as a yellow liquid (20.2 mg, 53% yield). <sup>1</sup>H NMR (500 MHz, CDCl<sub>3</sub>) δ 7.48 – 7.42 (m, 2H), 7.41 – 7.32 (m, 3H), 6.33 (s, 1H), 5.89 (s, 1H), 5.23 – 5.13 (m, 1H), 1.34 (d, *J* = 6.3 Hz, 6H). <sup>13</sup>C NMR (126 MHz, CDCl<sub>3</sub>) δ 166.4, 141.9, 136.8, 128.3, 128.2, 126.0, 68.6, 21.8. These data are consistent with the published literature.<sup>3</sup>

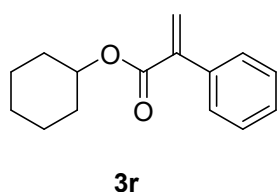

**Cyclohexyl 2-phenylacrylate (3r).** Flash column chromatography to afford product **3r** as a colorless liquid (30.4 mg, 66% yield). <sup>1</sup>H NMR (500 MHz, CDCl<sub>3</sub>) δ 7.46 – 7.40 (m, 2H), 7.39 – 7.30 (m, 3H), 6.33 (d, *J* = 1.2 Hz, 1H), 5.87 (t, *J* = 1.0 Hz, 1H), 4.98 – 4.92 (m, 1H), 1.94 – 1.87 (m, 2H), 1.77 – 1.69 (m, 2H), 1.55 – 1.51 (m, 2H), 1.45 – 1.37 (m, 2H), 1.36 – 1.23 (m, 2H). <sup>13</sup>C NMR (126 MHz, CDCl<sub>3</sub>) δ 166.2, 141.9, 136.9, 128.3, 128.0, 127.9, 126.0, 73.29, 31.5, 25.4, 23.6. These data are consistent with the published literature.<sup>15</sup>

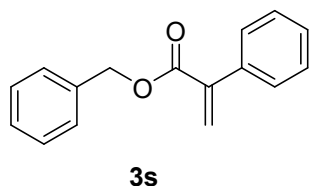

**Benzyl 2-phenylacrylate (3s).** Flash column chromatography to afford product **3s** as a yellow liquid (33.4 mg, 70% yield). <sup>1</sup>H NMR (500 MHz, CDCl<sub>3</sub>) δ 7.44 – 7.42 (m, 2H), 7.39 – 7.33 (m, 8H), 6.40 (s, 1H), 5.92 (s, 1H), 5.28 (s, 2H). <sup>13</sup>C NMR (126 MHz, CDCl<sub>3</sub>) δ 166.6, 141.2, 136.6, 135.9, 128.7, 128.5, 128.4, 128.3, 128.2, 127.1, 66.8. These data are consistent with the published literature.<sup>3</sup>

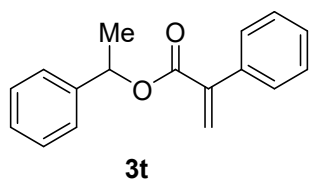

**1-Phenylethyl 2-phenylacrylate (3t).** Flash column chromatography to afford product **3t** as a colorless liquid (31.7 mg, 63% yield). <sup>1</sup>H NMR (500 MHz, CDCl<sub>3</sub>) δ 7.44 – 7.31 (m, 10H), 6.41 (s, 1H), 6.06 (q, *J* = 6.6 Hz, 1H), 5.92 (s, 1H), 1.63 (d, *J* = 6.6 Hz, 3H). <sup>13</sup>C NMR (126 MHz, CDCl<sub>3</sub>)

$\delta$  165.9, 141.6, 141.5, 136.7, 128.5, 128.4, 128.3, 128.1, 128.0, 127.9, 126.6, 126.0, 22.3. HRMS (ESI)  $[M+Na]^+$ : calculated for  $C_{17}H_{16}O_2Na$  : 275.1048, found 275.1054.

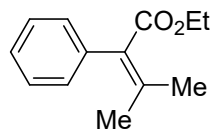

**5a**

**Ethyl 3-methyl-2-phenylbut-2-enoate (5a).** Flash column chromatography to afford product **5a** as a yellow liquid (25.3 mg, 62% yield).  $^1H$  NMR (500 MHz,  $CDCl_3$ )  $\delta$  7.36 – 7.33 (m, 2H), 7.29 – 7.27 (m, 1H), 7.21 – 7.19 (m, 2H), 4.17 (q,  $J = 7.1$  Hz, 2H), 2.12 (s, 3H), 1.70 (s, 3H), 1.22 (t,  $J = 7.1$  Hz, 3H).  $^{13}C$  NMR (126 MHz,  $CDCl_3$ )  $\delta$  168.8, 143.9, 138.1, 130.3, 129.4, 128.0, 126.9, 60.4, 23.1, 22.5, 14.2. These data are consistent with the published literature.<sup>12</sup>

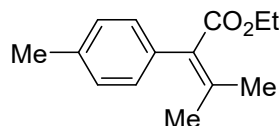

**5b**

**Ethyl 3-methyl-2-(*p*-tolyl)but-2-enoate (5b).** Flash column chromatography to afford product **5b** as a colorless liquid (32.3 mg, 74% yield).  $^1H$  NMR (500 MHz,  $CDCl_3$ )  $\delta$  7.16 – 7.11 (m, 2H), 7.09 – 7.06 (m, 2H), 4.16 (q,  $J = 7.1$  Hz, 2H), 2.35 (s, 3H), 2.09 (s, 3H), 1.70 (s, 3H), 1.22 (t,  $J = 7.1$  Hz, 3H).  $^{13}C$  NMR (126 MHz,  $CDCl_3$ )  $\delta$  169.0, 143.2, 136.5, 135.0, 130.2, 129.3, 128.8, 60.4, 22.9, 22.5, 21.2, 14.2. These data are consistent with the published literature.<sup>4</sup>

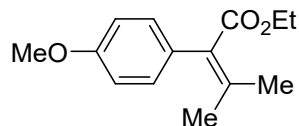

**5c**

**Ethyl 2-(4-methoxyphenyl)-3-methylbut-2-enoate (5c).** Flash column chromatography to afford product **5c** as a colorless liquid (29.9 mg, 64% yield).  $^1H$  NMR (500 MHz,  $CDCl_3$ )  $\delta$  7.12 – 7.09 (m, 2H), 6.88 – 6.85 (m, 2H), 4.16 (q,  $J = 7.1$  Hz, 2H), 3.81 (s, 3H), 2.07 (s, 3H), 1.70 (s, 3H), 1.22 (t,  $J = 7.1$  Hz, 3H).  $^{13}C$  NMR (126 MHz,  $CDCl_3$ )  $\delta$  169.1, 158.5, 143.1, 130.5, 130.3, 129.9, 113.5, 60.4, 55.2, 22.9, 22.5, 14.2. HRMS (ESI)  $[M+Na]^+$ : calculated for  $C_{14}H_{18}O_3Na$ : 257.1154, found 257.1142.

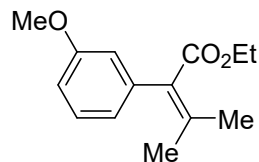

**5d**

**Ethyl 2-(3-methoxyphenyl)-3-methylbut-2-enoate (5d).** Flash column chromatography to afford product **5d** as a colorless liquid (30.5 mg, 65% yield).  $^1H$  NMR (500 MHz,  $CDCl_3$ )  $\delta$  7.31 – 7.27

(m, 1H), 6.87 – 6.74 (m, 3H), 4.20 (q,  $J = 7.1$  Hz, 2H), 3.83 (s, 3H), 2.13 (s, 3H), 1.73 (s, 3H), 1.25 (t,  $J = 7.1$  Hz, 3H).  $^{13}\text{C}$  NMR (126 MHz,  $\text{CDCl}_3$ )  $\delta$  168.7, 159.3, 143.9, 139.4, 130.2, 129.0, 121.9, 114.9, 112.5, 60.4, 55.2, 23.1, 22.5, 14.1. These data are consistent with the published literature.<sup>4</sup>

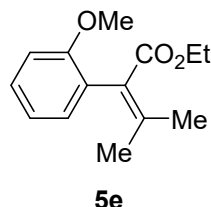

**Ethyl 2-(2-methoxyphenyl)-3-methylbut-2-enoate (5e).** Flash column chromatography to afford product **5e** as a colorless liquid (27.6 mg, 59% yield).  $^1\text{H}$  NMR (500 MHz,  $\text{CDCl}_3$ )  $\delta$  7.29 – 7.27 (m, 1H), 7.12 – 7.10 (m, 1H), 6.97 – 6.93 (m, 1H), 6.88 (d,  $J = 1.1$  Hz, 1H), 4.18 – 4.13 (q,  $J = 7.5$  Hz, 2H), 3.78 (s, 3H), 2.20 (s, 3H), 1.74 (s, 3H), 1.18 (t,  $J = 7.1$  Hz, 3H).  $^{13}\text{C}$  NMR (126 MHz,  $\text{CDCl}_3$ )  $\delta$  168.4, 157.1, 146.8, 131.6, 128.5, 127.6, 126.5, 120.2, 110.5, 59.9, 55.4, 23.9, 22.5, 14.2. These data are consistent with the published literature.<sup>4</sup>

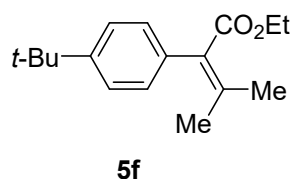

**Ethyl 2-(4-(tert-butyl)phenyl)-3-methylbut-2-enoate (5f).** Flash column chromatography to afford product **5f** as a yellow liquid (48.4 mg, 93% yield).  $^1\text{H}$  NMR (500 MHz,  $\text{CDCl}_3$ )  $\delta$  7.36 – 7.31 (m, 2H), 7.12 (d,  $J = 8.3$  Hz, 2H), 4.17 (q,  $J = 7.1$  Hz, 2H), 2.07 (s, 3H), 1.71 (s, 3H), 1.32 (s, 9H), 1.24 (t,  $J = 7.1$  Hz, 3H).  $^{13}\text{C}$  NMR (126 MHz,  $\text{CDCl}_3$ )  $\delta$  169.2, 149.7, 142.5, 134.8, 130.3, 128.9, 124.9, 60.4, 34.5, 31.3, 22.9, 22.6, 14.2. HRMS (ESI)  $[\text{M}+\text{H}]^+$ : calculated for  $\text{C}_{17}\text{H}_{24}\text{O}_2$ : 261.1852, found 261.1855.

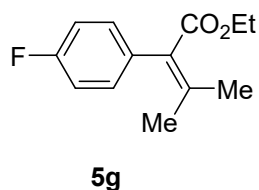

**Ethyl 2-(4-fluorophenyl)-3-methylbut-2-enoate (5g).** Flash column chromatography to afford product **5g** as a yellow liquid (27.1 mg, 61% yield).  $^1\text{H}$  NMR (500 MHz,  $\text{CDCl}_3$ )  $\delta$  7.16 – 7.11 (m, 2H), 7.03 – 6.99 (m, 2H), 4.15 (q,  $J = 7.1$  Hz, 2H), 2.11 (s, 3H), 1.67 (s, 3H), 1.21 (t,  $J = 7.1$  Hz, 3H).  $^{13}\text{C}$  NMR (126 MHz,  $\text{CDCl}_3$ )  $\delta$  168.5, 161.8 (d,  $J = 245.7$  Hz), 144.9, 134.1 (d,  $J = 2.5$  Hz), 131.1 (d,  $J = 7.6$  Hz), 129.3, 115.1 (d,  $J = 21.5$  Hz), 60.4, 23.2, 22.5, 14.2.  $^{19}\text{F}$  NMR (471 MHz,  $\text{CDCl}_3$ )  $\delta$  -115.58. HRMS (ESI)  $[\text{M}+\text{H}]^+$ : calculated for  $\text{C}_{13}\text{H}_{15}\text{FO}_2$ : 223.1134, found 223.1137.

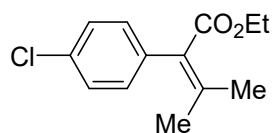

**5h**

**Ethyl 2-(4-chlorophenyl)-3-methylbut-2-enoate (5h).** Flash column chromatography to afford product **5h** as a colorless liquid (24.3 mg, 51% yield).  $^1\text{H}$  NMR (500 MHz,  $\text{CDCl}_3$ )  $\delta$  7.33 – 7.29 (m, 2H), 7.14 – 7.10 (m, 2H), 4.16 (q,  $J = 7.1$  Hz, 2H), 2.13 (s, 3H), 1.70 (s, 3H), 1.21 (t,  $J = 7.1$  Hz, 3H).  $^{13}\text{C}$  NMR (126 MHz,  $\text{CDCl}_3$ )  $\delta$  168.2, 145.5, 132.6, 130.8, 129.1, 128.2, 60.5, 23.3, 22.6, 14.2. These data are consistent with the published literature.<sup>4</sup>

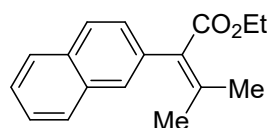

**5i**

**Ethyl 3-methyl-2-(naphthalen-2-yl)but-2-enoate (5i).** Flash column chromatography to afford product **5i** as a yellow liquid (30.9 mg, 61% yield).  $^1\text{H}$  NMR (500 MHz,  $\text{CDCl}_3$ )  $\delta$  7.84 – 7.75 (m, 3H), 7.65 (d,  $J = 1.7$  Hz, 1H), 7.51 – 7.42 (m, 2H), 7.32 (d,  $J = 1.7$  Hz, 1H), 4.17 (q,  $J = 7.1$  Hz, 2H), 2.17 (s, 3H), 1.74 (s, 3H), 1.20 (t,  $J = 7.1$  Hz, 3H).  $^{13}\text{C}$  NMR (126 MHz,  $\text{CDCl}_3$ )  $\delta$  168.7, 144.7, 135.6, 133.2, 132.3, 130.2, 128.2, 127.9, 127.8, 127.6, 127.5, 125.9, 125.8, 60.4, 23.3, 22.6, 14.2. These data are consistent with the published literature.<sup>13</sup>

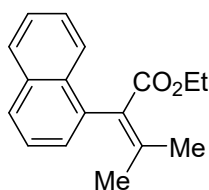

**5j**

**Ethyl 3-methyl-2-(naphthalen-1-yl)but-2-enoate (5j).** Flash column chromatography to afford product **5j** as a colorless liquid (31.0 mg, 61% yield).  $^1\text{H}$  NMR (500 MHz,  $\text{CDCl}_3$ )  $\delta$  7.86 – 7.79 (m, 3H), 7.48 – 7.45 (m, 3H), 7.31 – 7.29 (m, 1H), 4.10 – 4.05 (m, 2H), 2.30 (s, 3H), 1.54 (s, 3H), 1.07 (t,  $J = 7.1$  Hz, 3H).  $^{13}\text{C}$  NMR (126 MHz,  $\text{CDCl}_3$ )  $\delta$  168.3, 147.9, 136.2, 133.6, 132.2, 128.2, 127.9, 127.5, 127.3, 125.9, 125.6, 125.5, 125.4, 60.2, 23.8, 22.4, 14.1. HRMS (ESI)  $[\text{M}+\text{Na}]^+$ : calculated for  $\text{C}_{17}\text{H}_{18}\text{O}_2\text{Na}$ : 277.1024, found 277.1203.

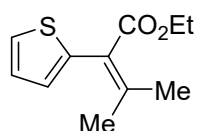

**5k**

**Ethyl 3-methyl-2-(thiophen-2-yl)but-2-enoate (5k).** Flash column chromatography to afford product **5k** as a yellow liquid (19.3 mg, 46% yield).  $^1\text{H}$  NMR (500 MHz,  $\text{CDCl}_3$ )  $\delta$  7.29 – 7.27 (m, 1H), 7.00 – 6.98 (m, 1H), 6.87 – 6.83 (m, 1H), 4.21 (q,  $J = 7.1$  Hz, 2H), 2.09 (s, 3H), 1.86 (s, 3H),



1.26 (t,  $J = 7.1$  Hz, 3H).  $^{13}\text{C}$  NMR (126 MHz,  $\text{CDCl}_3$ )  $\delta$  168.2, 146.0, 138.5, 127.2, 126.5, 125.5, 123.6, 60.7, 23.3, 22.9, 14.1. HRMS (ESI)  $[\text{M}+\text{Na}]^+$ : calculated for  $\text{C}_{11}\text{H}_{14}\text{O}_2\text{SNa}$ : 233.0612, found 233.0613.

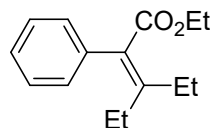

**5l**

**Ethyl 3-ethyl-2-phenylpent-2-enoate (5l).** Flash column chromatography to afford product **5l** as a colorless liquid (32.5 mg, 70% yield).  $^1\text{H}$  NMR (500 MHz,  $\text{CDCl}_3$ )  $\delta$  7.36 – 7.32 (m, 2H), 7.31 – 7.26 (m, 1H), 7.23 – 7.19 (m, 2H), 4.15 (q,  $J = 7.1$  Hz, 2H), 2.45 (q,  $J = 7.5$  Hz, 2H), 2.00 (q,  $J = 7.5$  Hz, 2H), 1.22 (t,  $J = 7.1$  Hz, 3H), 1.16 (t,  $J = 7.5$  Hz, 3H), 0.95 (t,  $J = 7.5$  Hz, 3H).  $^{13}\text{C}$  NMR (126 MHz,  $\text{CDCl}_3$ )  $\delta$  168.8, 153.5, 137.9, 129.9, 129.3, 128.0, 126.9, 60.3, 25.6, 14.1, 13.3, 12.7. HRMS (ESI)  $[\text{M}+\text{Na}]^+$ : calculated for  $\text{C}_{15}\text{H}_{20}\text{O}_2\text{Na}$ : 255.1361, found 255.1263.

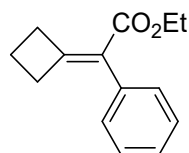

**5m**

**Ethyl 2-cyclobutylidene-2-phenylacetate (5m).** Flash column chromatography to afford product **5m** as a yellow liquid (21.6 mg, 50% yield).  $^1\text{H}$  NMR (500 MHz,  $\text{CDCl}_3$ )  $\delta$  7.36 – 7.32 (m, 2H), 7.28-7.23 (m, 3H), 4.22 (q,  $J = 7.1$  Hz, 2H), 3.29 – 3.24 (m, 2H), 2.82 – 2.78 (m, 2H), 2.10-2.04 (m, 2H), 1.59 (s, 3H), 1.29 (t,  $J = 7.1$  Hz, 4H).  $^{13}\text{C}$  NMR (126 MHz,  $\text{CDCl}_3$ )  $\delta$  166.8, 162.4, 135.7, 129.2, 127.9, 126.9, 125.9, 60.2, 34.4, 32.5, 17.2, 14.4. HRMS (ESI)  $[\text{M}+\text{Na}]^+$ : calculated for  $\text{C}_{14}\text{H}_{16}\text{O}_2\text{Na}$ : 239.1048, found 239.1044.

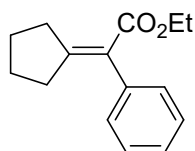

**5n**

**Ethyl 2-cyclopentylidene-2-phenylacetate (5n).** Flash column chromatography to afford product **5n** as a yellow liquid (25.3 mg, 55% yield).  $^1\text{H}$  NMR (500 MHz,  $\text{CDCl}_3$ )  $\delta$  7.37 – 7.34 (m, 2H), 7.29 – 7.27 (m, 1H), 7.19 – 7.17 (m, 2H), 4.20 – 4.16 (q,  $J = 7.0$  Hz, 2H), 2.91 – 2.88 (m, 2H), 2.24 – 2.21 (m, 2H), 1.82-1.76 (m, 2H), 1.63-1.58 (m, 3H), 1.24 (t,  $J = 7.1$  Hz, 3H).  $^{13}\text{C}$  NMR (126 MHz,  $\text{CDCl}_3$ )  $\delta$  167.5, 162.8, 139.1, 129.2, 127.9, 126.7, 125.8, 60.1, 35.2, 34.0, 26.8, 25.8, 14.3. HRMS (ESI)  $[\text{M}+\text{Na}]^+$ : calculated for  $\text{C}_{15}\text{H}_{18}\text{O}_2\text{Na}$ : 253.1204, found 253.1205.

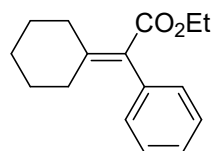

**5o**

**Ethyl 2-cyclohexylidene-2-phenylacetate (5o).** Flash column chromatography to afford product **5o** as a light yellow liquid (24.4 mg, 50% yield).  $^1\text{H}$  NMR (500 MHz,  $\text{CDCl}_3$ )  $\delta$  7.36 – 7.33 (m,

2H), 7.29 – 7.27 (m, 1H), 7.24 – 7.20 (m, 2H), 4.20 – 4.16 (q,  $J = 7.0$  Hz, 2H), 2.55 – 2.53 (m, 2H), 2.12 – 2.09 (m, 2H), 1.74 – 1.70 (m, 2H), 1.64 – 1.55 (m, 4H), 1.24 (d,  $J = 7.1$  Hz, 3H).  $^{13}\text{C}$  NMR (126 MHz,  $\text{CDCl}_3$ )  $\delta$  169.2, 148.9, 137.4, 129.4, 128.1, 127.7, 126.9, 60.4, 32.6, 32.0, 28.2(5), 28.2(2), 26.3, 14.1. These data are consistent with the published literature.<sup>14</sup>

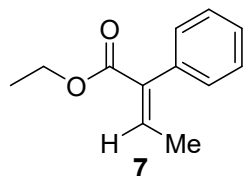

**Ethyl (*E*)-2-phenylbut-2-enoate (7).** Flash column chromatography to afford product **7** as a light yellow liquid (30.8 mg, 81% yield).  $^1\text{H}$  NMR (500 MHz,  $\text{CDCl}_3$ )  $\delta$  7.39 – 7.35 (m, 2H), 7.33 – 7.29 (m, 1H), 7.20 – 7.14 (m, 3H), 4.21 (q,  $J = 7.1$  Hz, 2H), 1.75 (d,  $J = 7.3$  Hz, 3H), 1.26 (t,  $J = 7.1$  Hz, 3H).  $^{13}\text{C}$  NMR (126 MHz,  $\text{CDCl}_3$ )  $\delta$  167.1, 139.6, 135.1, 134.9, 129.8, 127.9, 127.3, 60.7, 15.4, 14.2. These data are consistent with the published literature.<sup>15</sup>

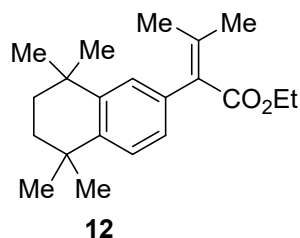

**Ethyl 3-methyl-2-(5,5,8,8-tetramethyl-5,6,7,8-tetrahydronaphthalen-2-yl)but-2-enoate (12).** Flash column chromatography to afford product **12** as a colorless liquid (45.9 mg, 73% yield).  $^1\text{H}$  NMR (500 MHz,  $\text{CDCl}_3$ )  $\delta$  7.23 (d,  $J = 8.1$  Hz, 1H), 7.12 (d,  $J = 1.9$  Hz, 1H), 6.98 – 6.94 (m, 1H), 4.19 (q,  $J = 7.1$  Hz, 2H), 2.04 (s, 3H), 1.72 (s, 3H), 1.68 (s, 4H), 1.28 (s, 6H), 1.26 (s, 6H), 1.25 (t,  $J = 7.2$  Hz, 3H).  $^{13}\text{C}$  NMR (126 MHz,  $\text{CDCl}_3$ )  $\delta$  169.4, 144.2, 143.3, 141.4, 134.4, 130.8, 127.6, 126.4, 125.9, 60.4, 35.1(2), 35.1(0), 34.2, 34.0, 31.8, 22.7, 22.6, 14.2. These data are consistent with the published literature.<sup>16</sup>

## 3.2 General Procedure of the Alkylation Reactions of $\alpha$ -Arylsulfonyloxyacrylates

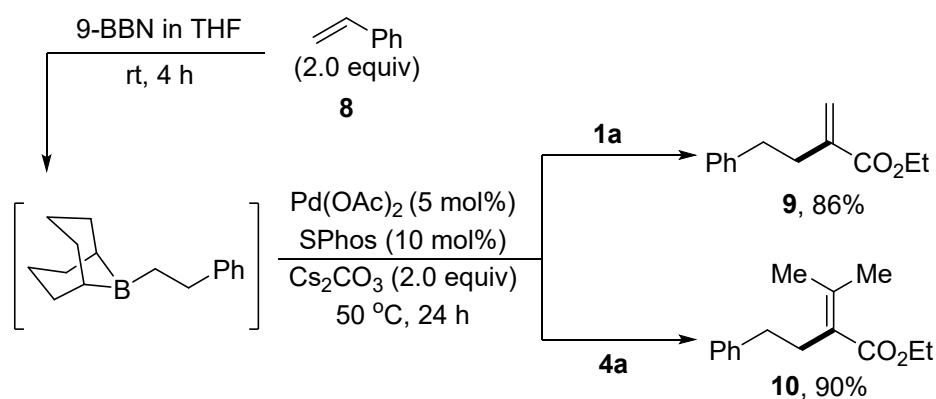

One Schlenk tube equipped with a magnetic stir bar was charged with styrene **8** (208 mg, 2 mmol, 1.0 equiv) and a solution of 9-BBN in THF (4 mL, 0.5 M, 1.0 equiv), stirred for 4 h at room temperature to afford a solution of *B*-phenylethyl-9-BBN in THF. Another Schlenk tube equipped with a magnetic stir bar was charged with **1a** (109.6 mg, 0.4 mmol, 1.0 equiv) or **4a** (120.8 mg, 0.4 mmol, 1.0 equiv), Pd(OAc)<sub>2</sub> (4.5 mg, 0.02 mmol), SPhos (16.4 mg, 0.04 mmol), Cs<sub>2</sub>CO<sub>3</sub> (260.8 mg, 0.8 mmol, 2.0 equiv) and the solution of *B*-phenylethyl-9-BBN in THF (1.6 mL, prepared above). The mixture was stirred at 50 °C for 24 h. After completed, the reaction mixture was cooled down to room temperature, diluted with ethyl acetate (2 mL), and pushed through a plug of silica gel with ethyl acetate. The filtrate was concentrated under reduced pressure. The residue was chromatographed on silica gel column to give the target product **9** (70.2 mg, 86% yield) or **10** (83.6 mg, 90% yield).

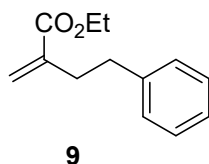

**Ethyl 2-methylene-4-phenylbutanoate (9).** Flash column chromatography to afford product **9** as a yellow liquid (35.1 mg, 86% yield). <sup>1</sup>H NMR (500 MHz, CDCl<sub>3</sub>) δ 7.34 – 7.30 (m, 2H), 7.25 – 7.21 (m, 3H), 6.19 (d, *J* = 1.4 Hz, 1H), 5.53 (q, *J* = 1.3 Hz, 1H), 4.26 (q, *J* = 7.2 Hz, 2H), 2.83 (d, *J* = 8.4 Hz, 2H), 2.70 – 2.64 (m, 2H), 1.35 (t, *J* = 7.1 Hz, 3H). <sup>13</sup>C NMR (126 MHz, CDCl<sub>3</sub>) δ 167.1, 141.4, 140.1, 128.5, 128.3, 125.9, 125.1, 60.6, 34.9, 33.9, 14.2. These data are consistent with the published literature.<sup>17</sup>

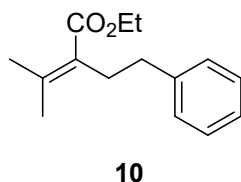

**Ethyl 3-methyl-2-phenethylbut-2-enoate (10).** Flash column chromatography to afford product **10** as a colorless liquid (41.8 mg, 90% yield). <sup>1</sup>H NMR (500 MHz, CDCl<sub>3</sub>) δ 7.31 – 7.27 (m, 2H), 7.22 – 7.19 (m, 3H), 4.21 (q, *J* = 7.1 Hz, 2H), 2.73 – 2.69 (m, 2H), 2.63 – 2.57 (m, 2H), 2.00 (s, 3H), 1.73 (s, 3H), 1.32 (d, *J* = 7.1 Hz, 3H). <sup>13</sup>C NMR (126 MHz, CDCl<sub>3</sub>) δ 169.5, 143.1, 141.8,

---

128.5, 128.2, 127.0, 125.8, 59.9, 35.3, 32.2, 22.9, 21.7, 14.3. HRMS (ESI) [M+Na]<sup>+</sup>: calculated for C<sub>15</sub>H<sub>20</sub>O<sub>2</sub>Na: 255.1361, found 255.1360.

## 4 References

1. (a) J. Zhu, Y. Yuan, S. Wang and Z.-J. Yao, Synthesis of 2,3-Dialkylated Tartaric Acid Esters via Visible Light Photoredox-Catalyzed Reductive Dimerization of  $\alpha$ -Ketoesters, *ACS Omega*, 2017, **2**, 4665-4677; (b) C. Feng, D. Feng and T.-P. Loh, Rhodium(III)-catalyzed C–H allylation of electron-deficient alkenes with allyl acetates, *Chem. Commun.*, 2015, **51**, 342-345; (c) X. del Corte, A. López-Francés, E. Martínez de Marigorta, F. Palacios and J. Vicario, Stereo- and Regioselective [3+3] Annulation Reaction Catalyzed by Ytterbium: Synthesis of Bicyclic 1,4-Dihydropyridines, *Adv. Synth. Catal.*, 2021, **363**, 4761-4769.
2. (a) L. Zhang, Y. Fang, X. Jin, H. Xu, R. Li, H. Wu, B. Chen, Y. Zhu, Y. Yang and Z. Tian, Pd-Catalysed Suzuki coupling of  $\alpha$ -bromoethenylphosphonates with organotrifluoroborates: a general protocol for the synthesis of terminal  $\alpha$ -substituted vinylphosphonates, *Org. Biomol. Chem.*, 2017, **15**, 8985-8989; (b) A. J. J. Lennox and G. C. Lloyd-Jones, Preparation of Organotrifluoroborate Salts: Precipitation-Driven Equilibrium under Non-Etching Conditions, *Angew. Chem. Int. Ed.*, 2012, **51**, 9385-9388.
3. C. Peng, G. Yan, Y. Wang, Y. Jiang, Y. Zhang and J. Wang, Palladium-Catalyzed Coupling Reaction of  $\alpha$ -Diazocarbonyl Compounds with Aromatic Boronic Acids or Halides, *Synthesis*, 2010, 4154-4168.
4. J. Barluenga, M. Tomás-Gamasa, F. Aznar and C. Valdés, Synthesis of 2-Arylacrylates from Pyruvate by Tosylhydrazide-Promoted Pd-Catalyzed Coupling with Aryl Halides, *Chem. Eur. J.*, 2010, **16**, 12801-12803.
5. S. Watanabe, T. Fujita, M. Sakamoto, H. Endo and T. Kitazume, Fluorination of aromatic  $\alpha$ -hydroxyesters with N,N-diethyl-1,1,2,3,3,3-hexafluoropropaneamine, *J. Fluorine Chem.*, 1990, **47**, 187-192.
6. F. Berthiol, H. Doucet and M. Santelli, Synthesis of Polysubstituted Alkenes by Heck Vinylation or Suzuki Cross-Coupling Reactions in the Presence of a Tetraphosphane-Palladium Catalyst, *Eur. J. Org. Chem.*, 2003, 1091-1096.
7. D. Yi, Q. Fu, S.-Y. Chen, M. Gao, L. Yang, Z.-J. Zhang, W. Liang, Q. Zhang, J.-X. Ji and W. Wei, Copper-catalyzed direct hydroxyphosphorylation of electron-deficient alkenes with H-phosphine oxides and dioxygen, *Tetrahedron Lett.*, 2017, **58**, 2058-2061.
8. R. J. Sullivan, G. P. R. Freure and S. G. Newman, Overcoming Scope Limitations in Cross-Coupling of Diazo Nucleophiles by Manipulating Catalyst Speciation and Using Flow Diazo Generation, *ACS Catal.*, 2019, **9**, 5623–5630.
9. Q. Zhao, J. Wang, T. Besset, X. Pannecoucke, J.-P. Bouillon and T. Poisson, Palladium-catalyzed synthesis of 3-trifluoromethylated 1,3-dienes from acrylate derivatives and BTP, *Tetrahedron*, 2018, **74**, 6033-6040.
10. A. Gualandi, D. Mazzarella, A. Ortega-Martínez, L. Mengozzi, F. Calcinelli, E. Matteucci, F. Monti, N. Armaroli, L. Sambri and P. G. Cozzi, Photocatalytic

- 
- Radical Alkylation of Electrophilic Olefins by Benzylic and Alkyl Zinc-Sulfonates, *ACS Catal.*, 2017, **7**, 5357–5362.
11. D. Yang, L. Liu, D.-L. Wang, Y. Lu, X.-L. Zhao and Y. Liu, Novel multi-dentate phosphines for Pd-catalyzed alkoxy-carbonylation of alkynes promoted by H<sub>2</sub>O additive, *J. Catal.*, 2019, **371**, 236-244.
  12. T. Tsuda, T. Yoshida and T. Saegusa, Palladium(0)-Catalyzed Coupling Reaction of Lithium ( $\alpha$ -Carbalkoxyvinyl)cuprates with Organic Halides, *J. Org. Chem.*, 1988, **53**, 607-610.
  13. A. Mital, R. Lad, A. Thakur, V. S. Negi and U. Ramachandran, Synthesis of novel 2-substituted 1,4-naphthoquinones using Heck reaction in 'green' reaction media, *ARKIVOC*, 2006, 99-106.
  14. L. Zhou, Y. Liu, Y. Zhang and J. Wang, Pd-catalyzed coupling of  $\beta$ -hydroxy  $\alpha$ -diazocarbonyl compounds with aryl iodides: a migratory insertion/ $\beta$ -hydroxy elimination sequence, *Chem. Commun.*, 2011, **47**, 3622-3624.
  15. M. V. Popescu, A. Mekereeya, J. V. Alegre-Requena, R. S. Paton and M. D. Smith, Visible-Light-Mediated Heterocycle Functionalization via Geometrically Interrupted [2+2] Cycloaddition, *Angew. Chem. Int. Ed.*, 2020, **59**, 23020-23024.
  16. M. I. Dawson, L. Jong, P. D. Hobbs, J. F. Cameron, W.-R. Chao, M. Pfahl, M.-O. Lee, B. Shroot and M. Pfahl, Conformational Effects on Retinoid Receptor Selectivity. 2. Effects of Retinoid Bridging Group on Retinoid X Receptor Activity and Selectivity, *J. Med. Chem.*, 1995, **38**, 3368–3383.
  17. J. Zhang, Y. Li, R. Xu and Y. Chen, Donor–Acceptor Complex Enables Alkoxy Radical Generation for Metal-Free C(sp<sup>3</sup>)–C(sp<sup>3</sup>) Cleavage and Allylation/Alkenylation, *Angew. Chem. Int. Ed.*, 2017, **56**, 12619-12623.

## 5 NMR Spectra of New Compounds

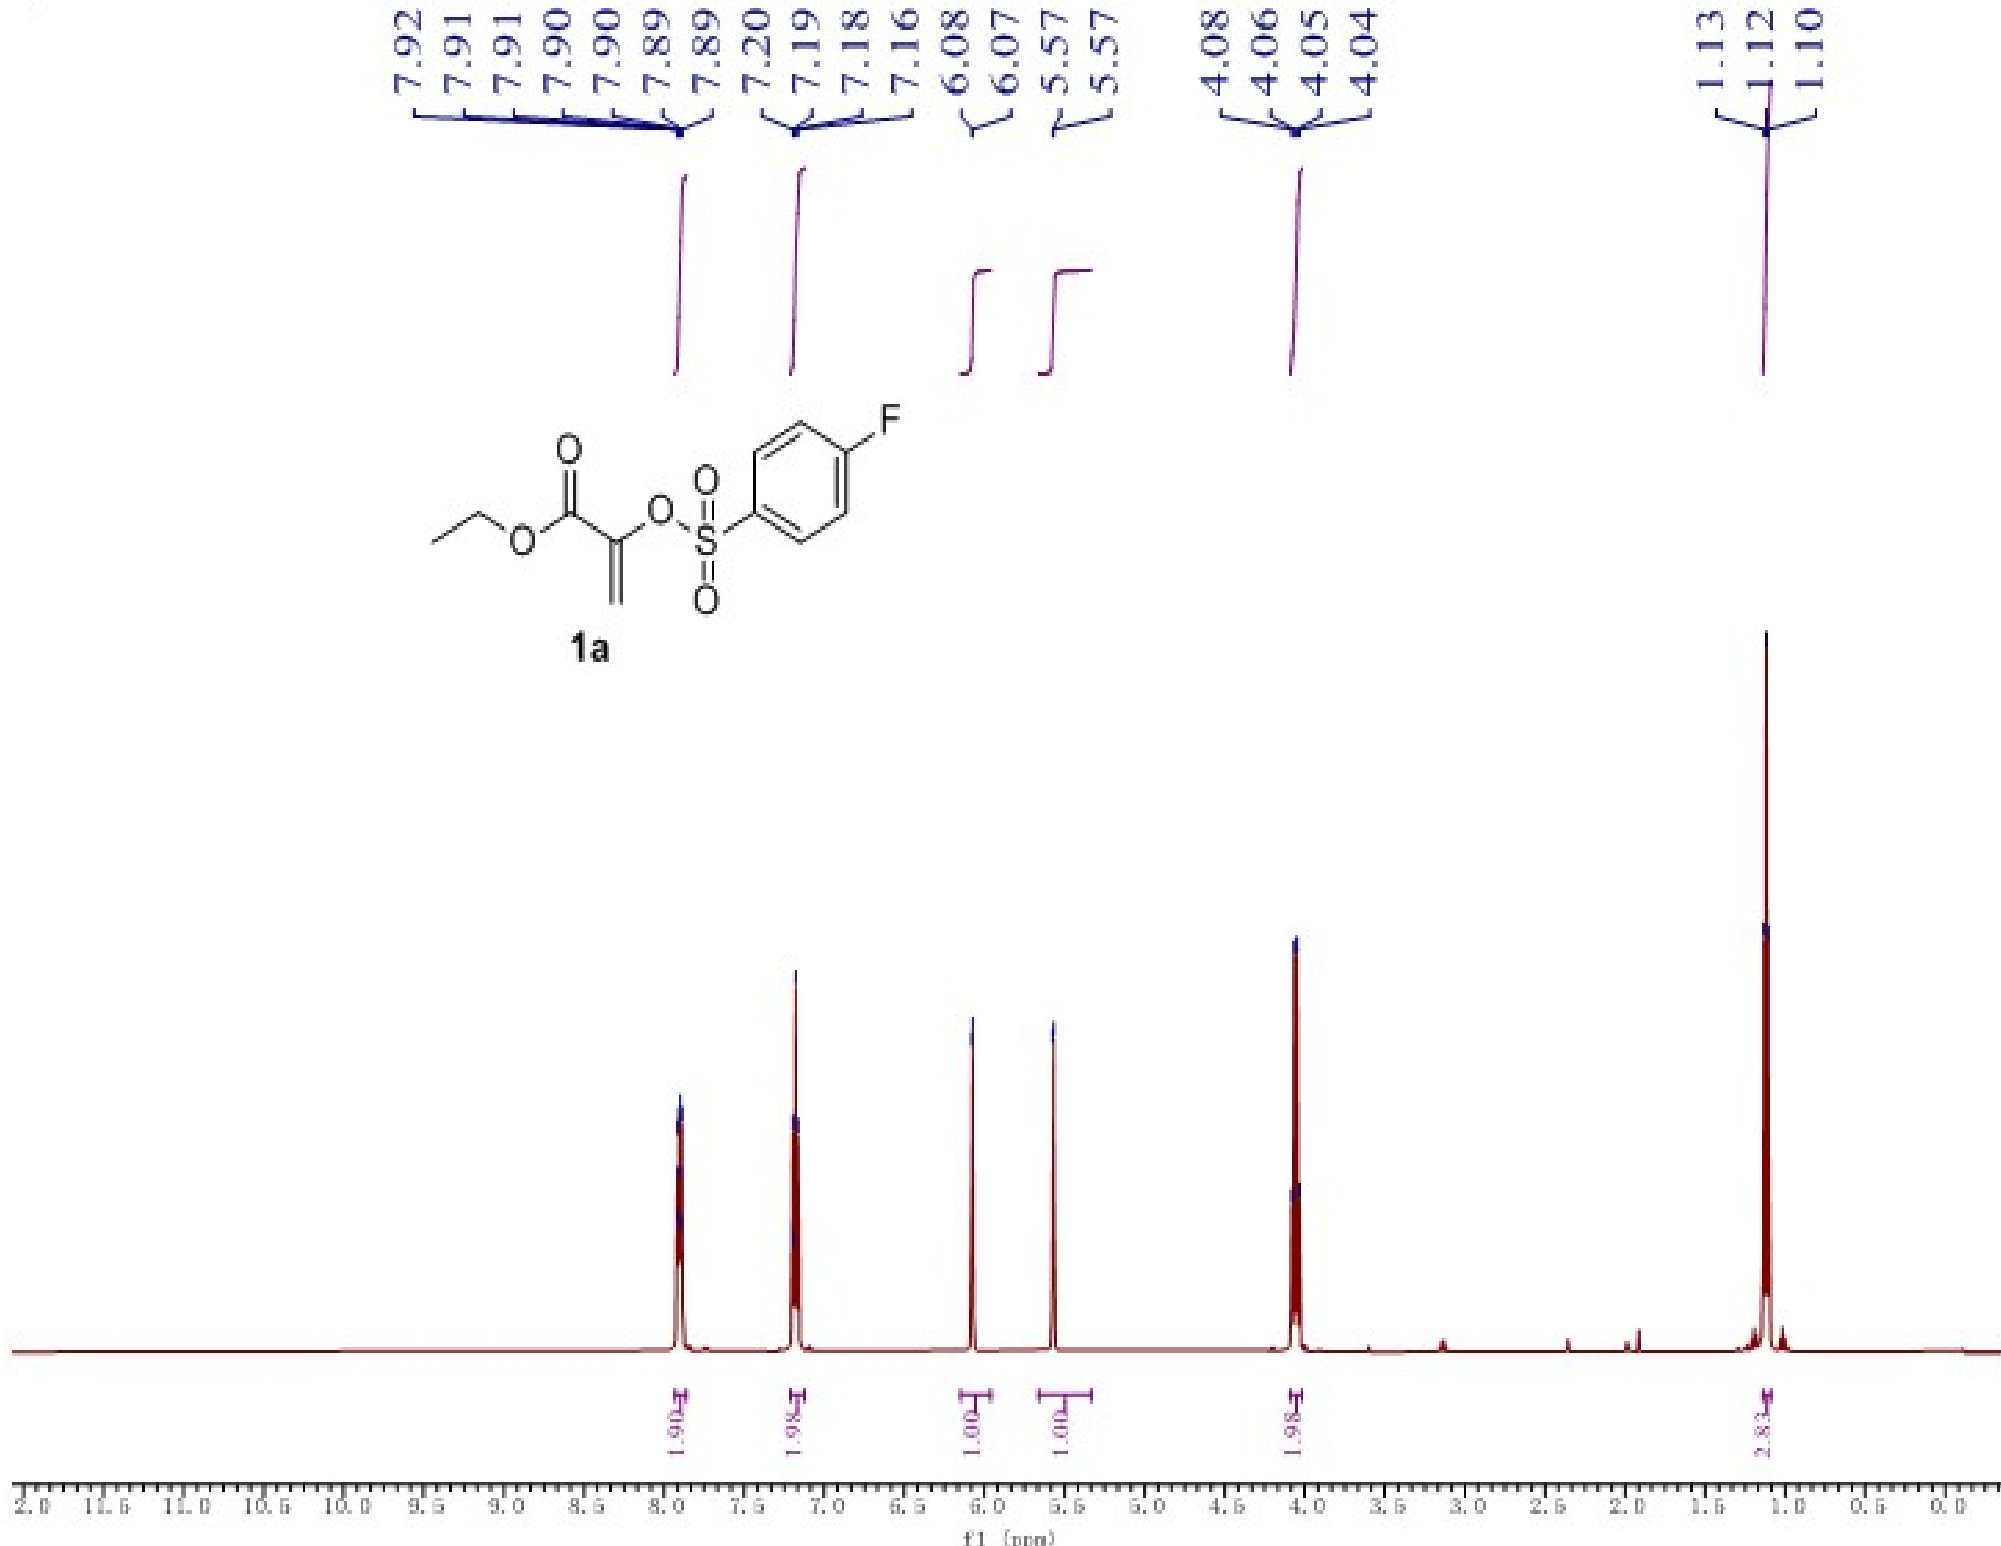

Apr21-2022, 191, f1.d

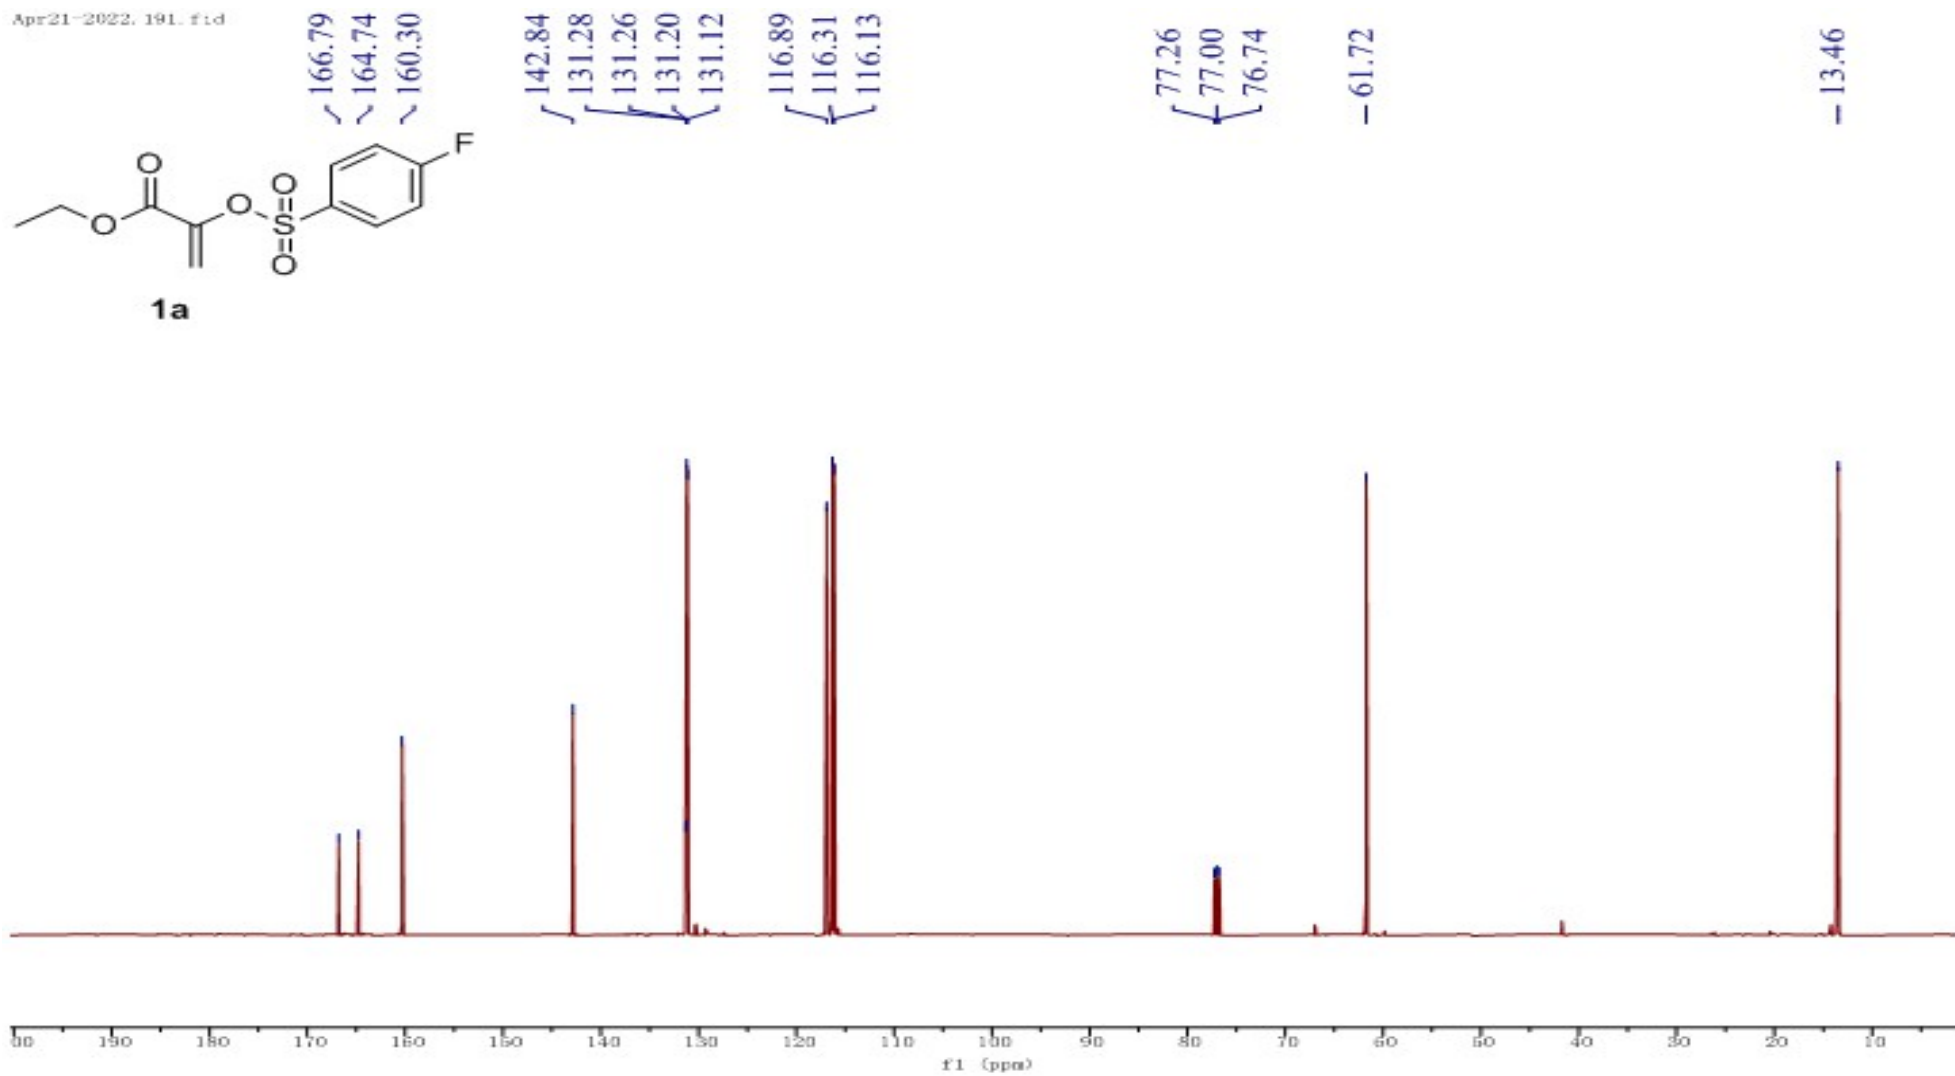

Apr21-2022, 192, f1.d

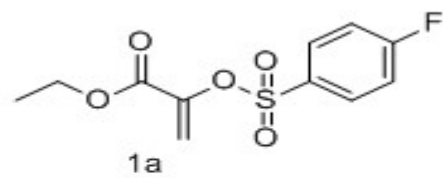

--102.16

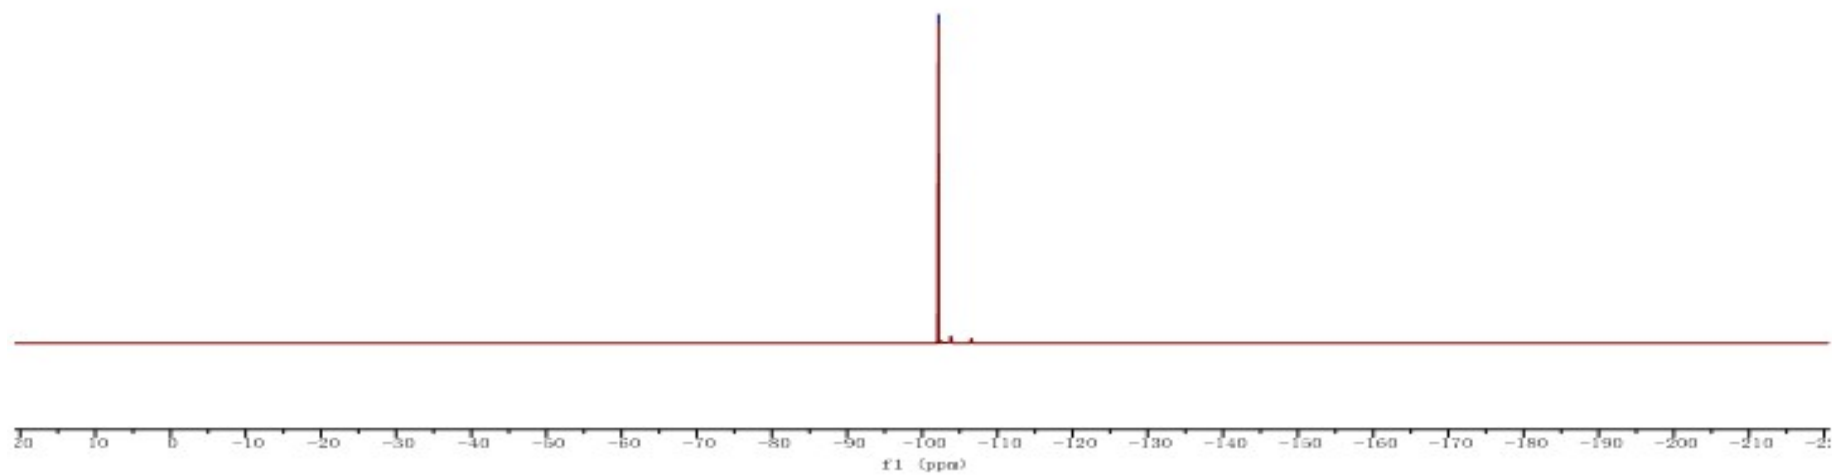



May07-2022\_50.f1d

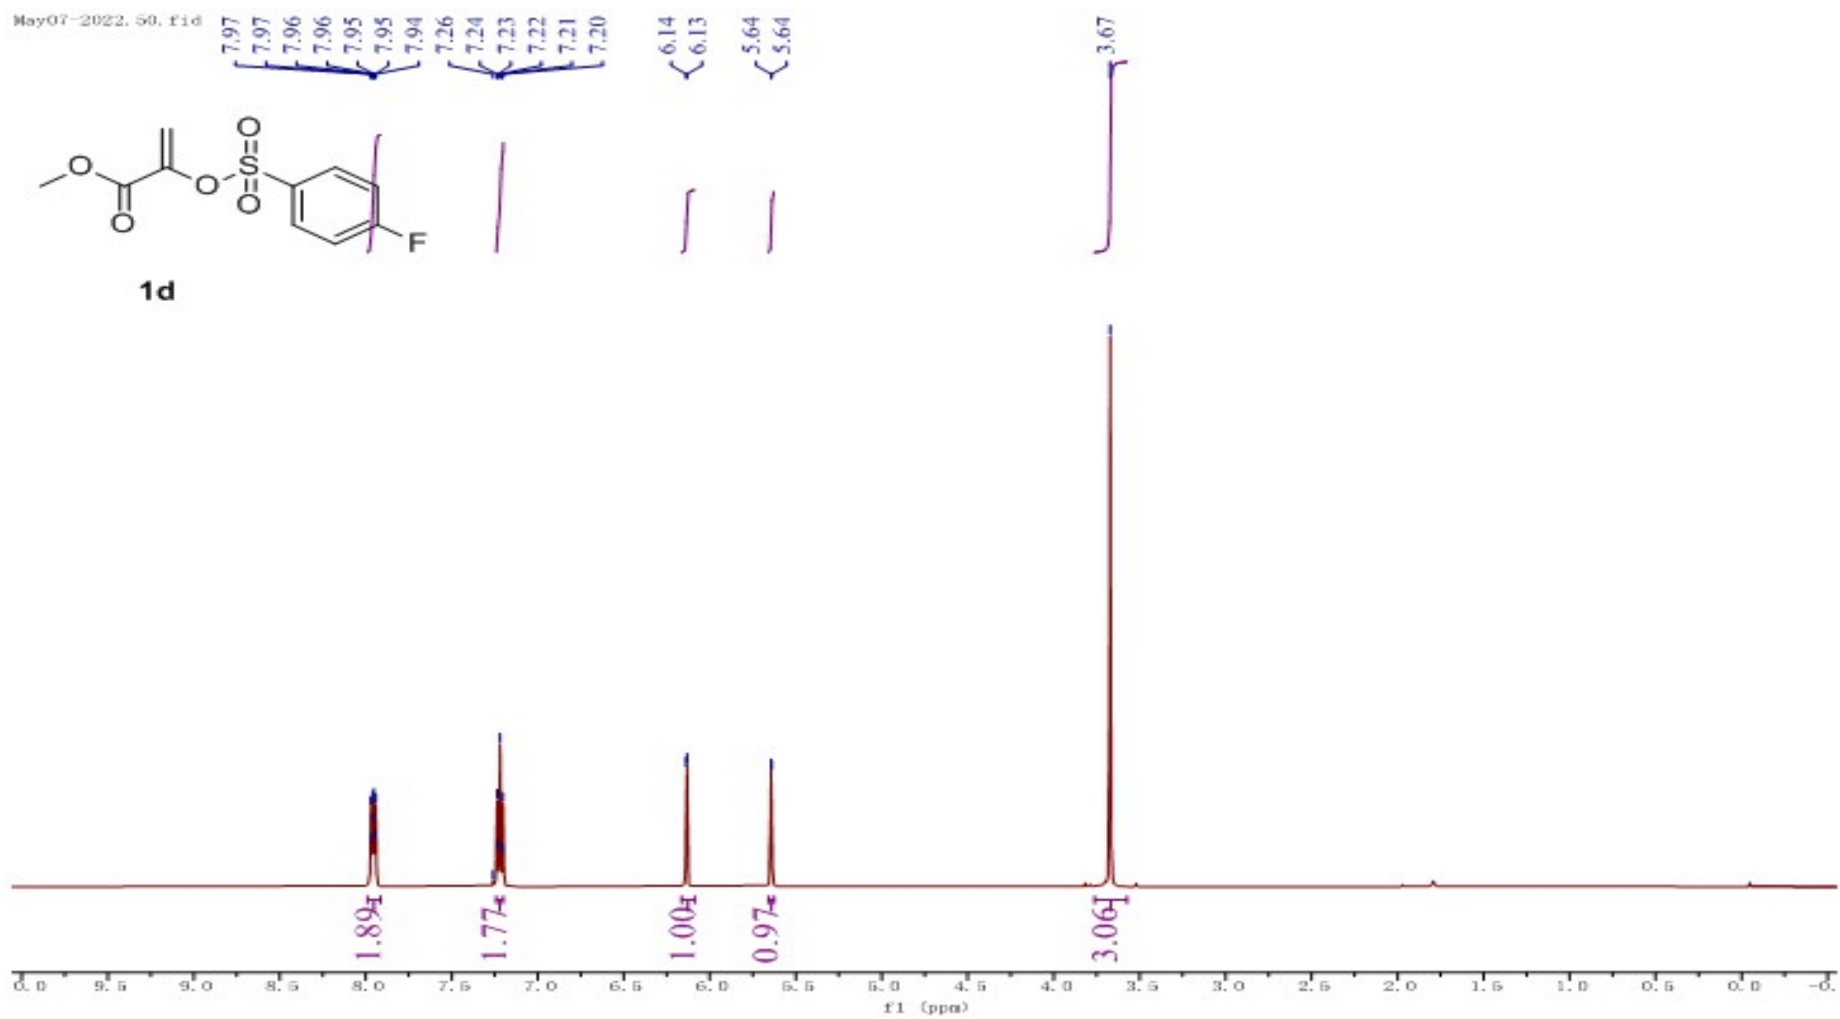

May07-2022, S1, f1d

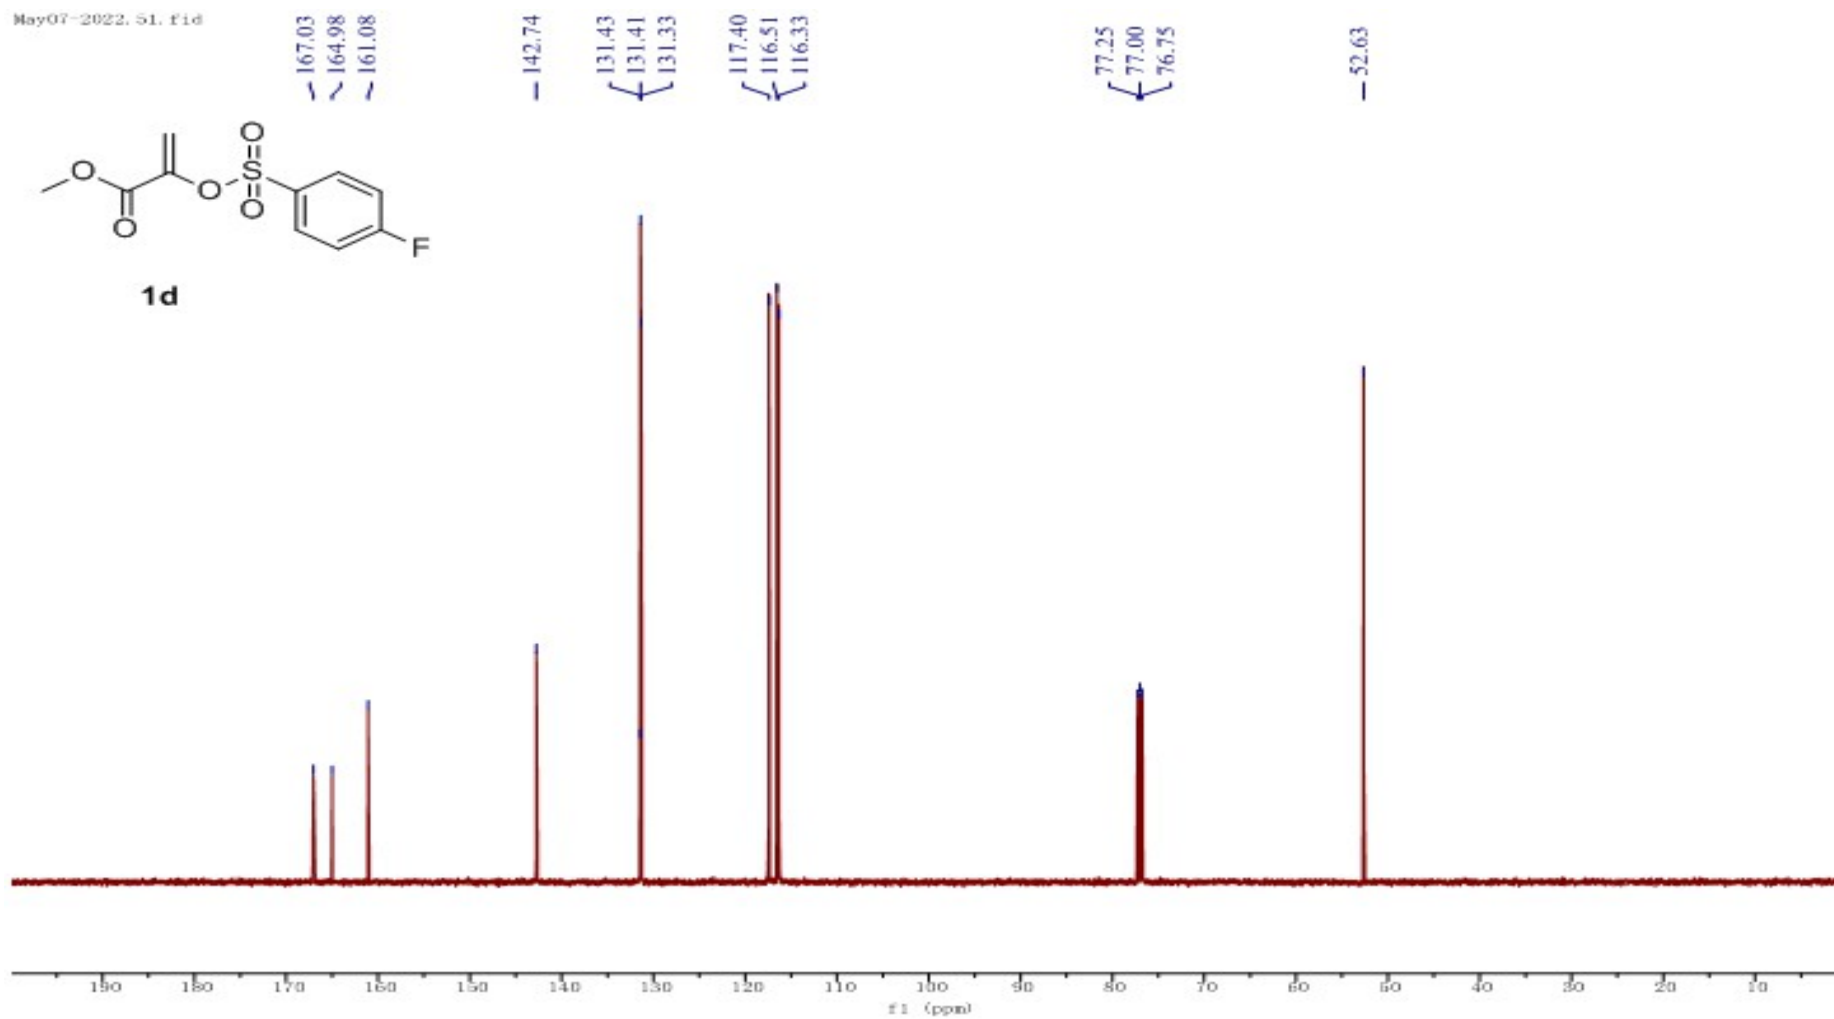

May07-2022, S2, f1d

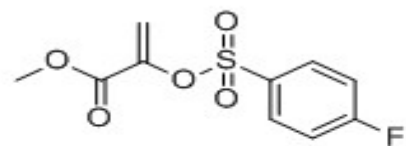

**1d**

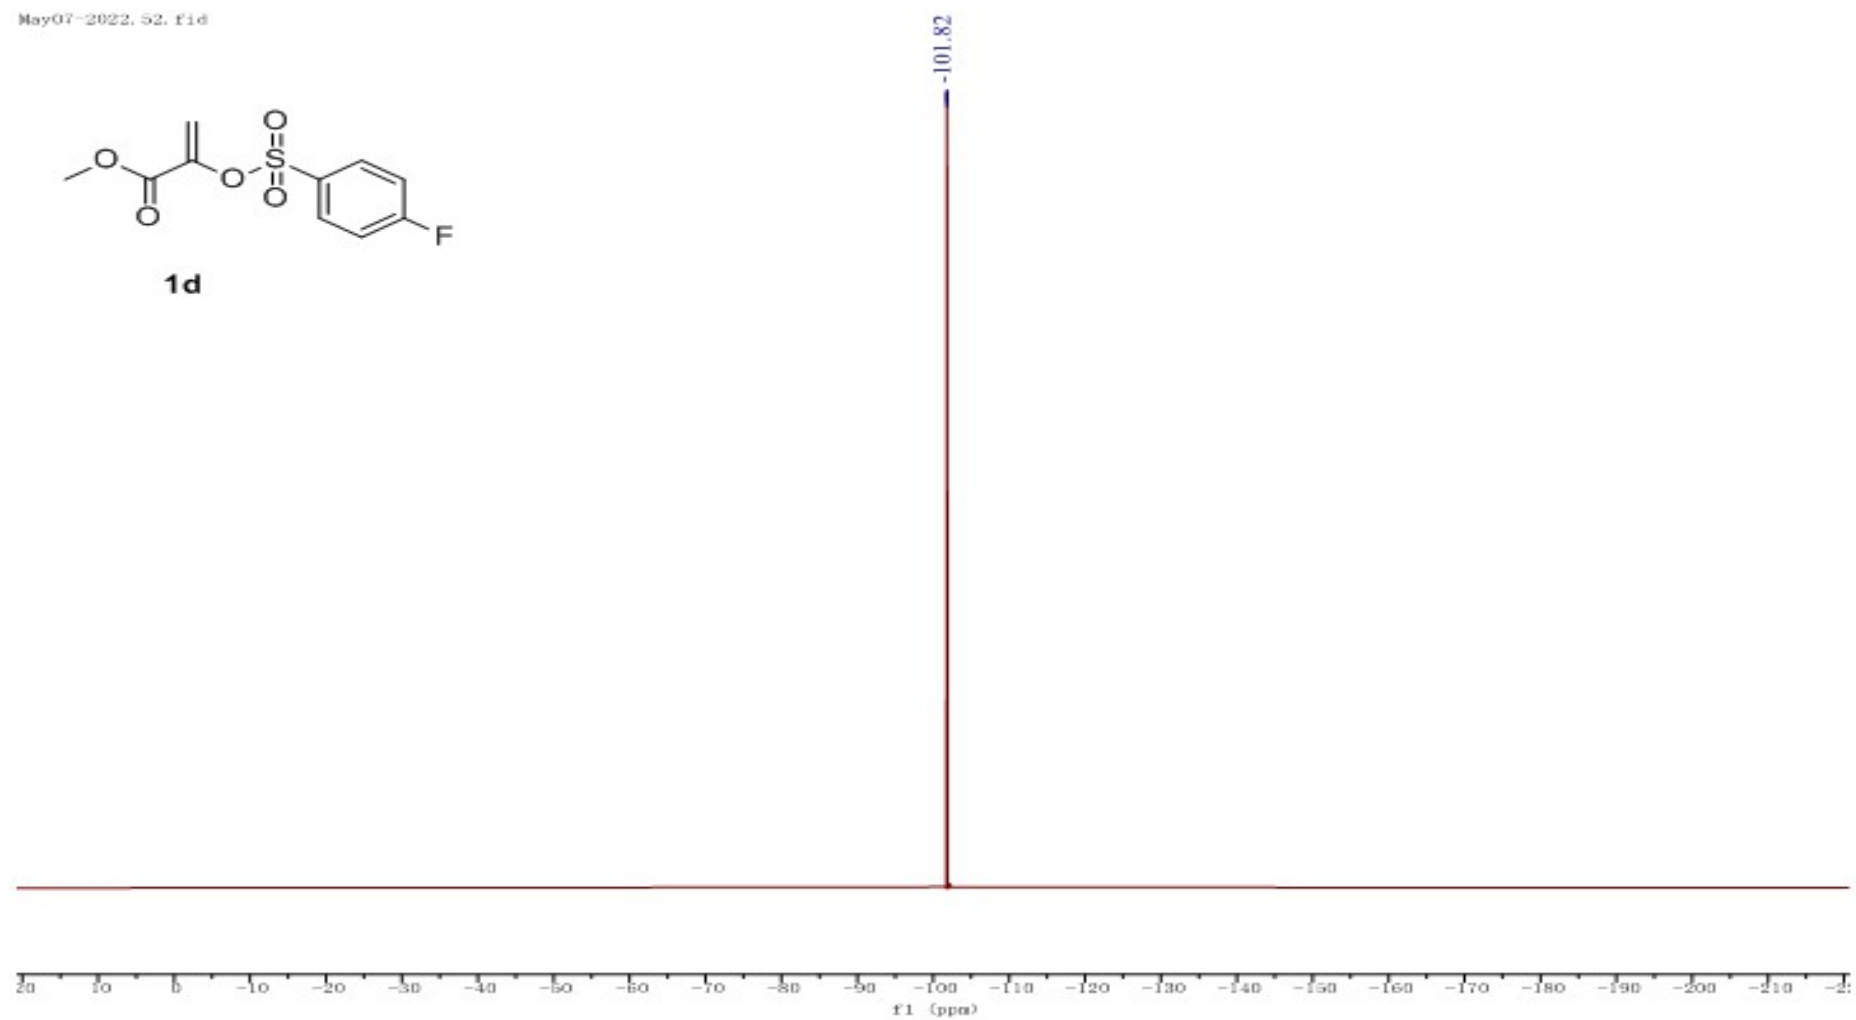

峰面积数据

8.02  
8.01  
8.01  
8.00  
8.00  
7.99  
7.99  
7.98  
7.26  
7.26  
7.25  
7.25  
7.24  
7.24  
7.24  
7.23  
7.23  
7.23  
7.22  
7.22  
6.15  
6.15  
5.68  
5.67  
5.02  
5.00  
4.99  
4.98  
4.97

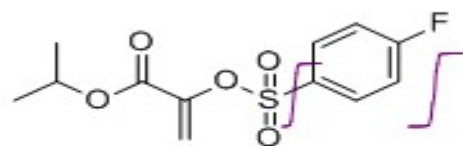

1e

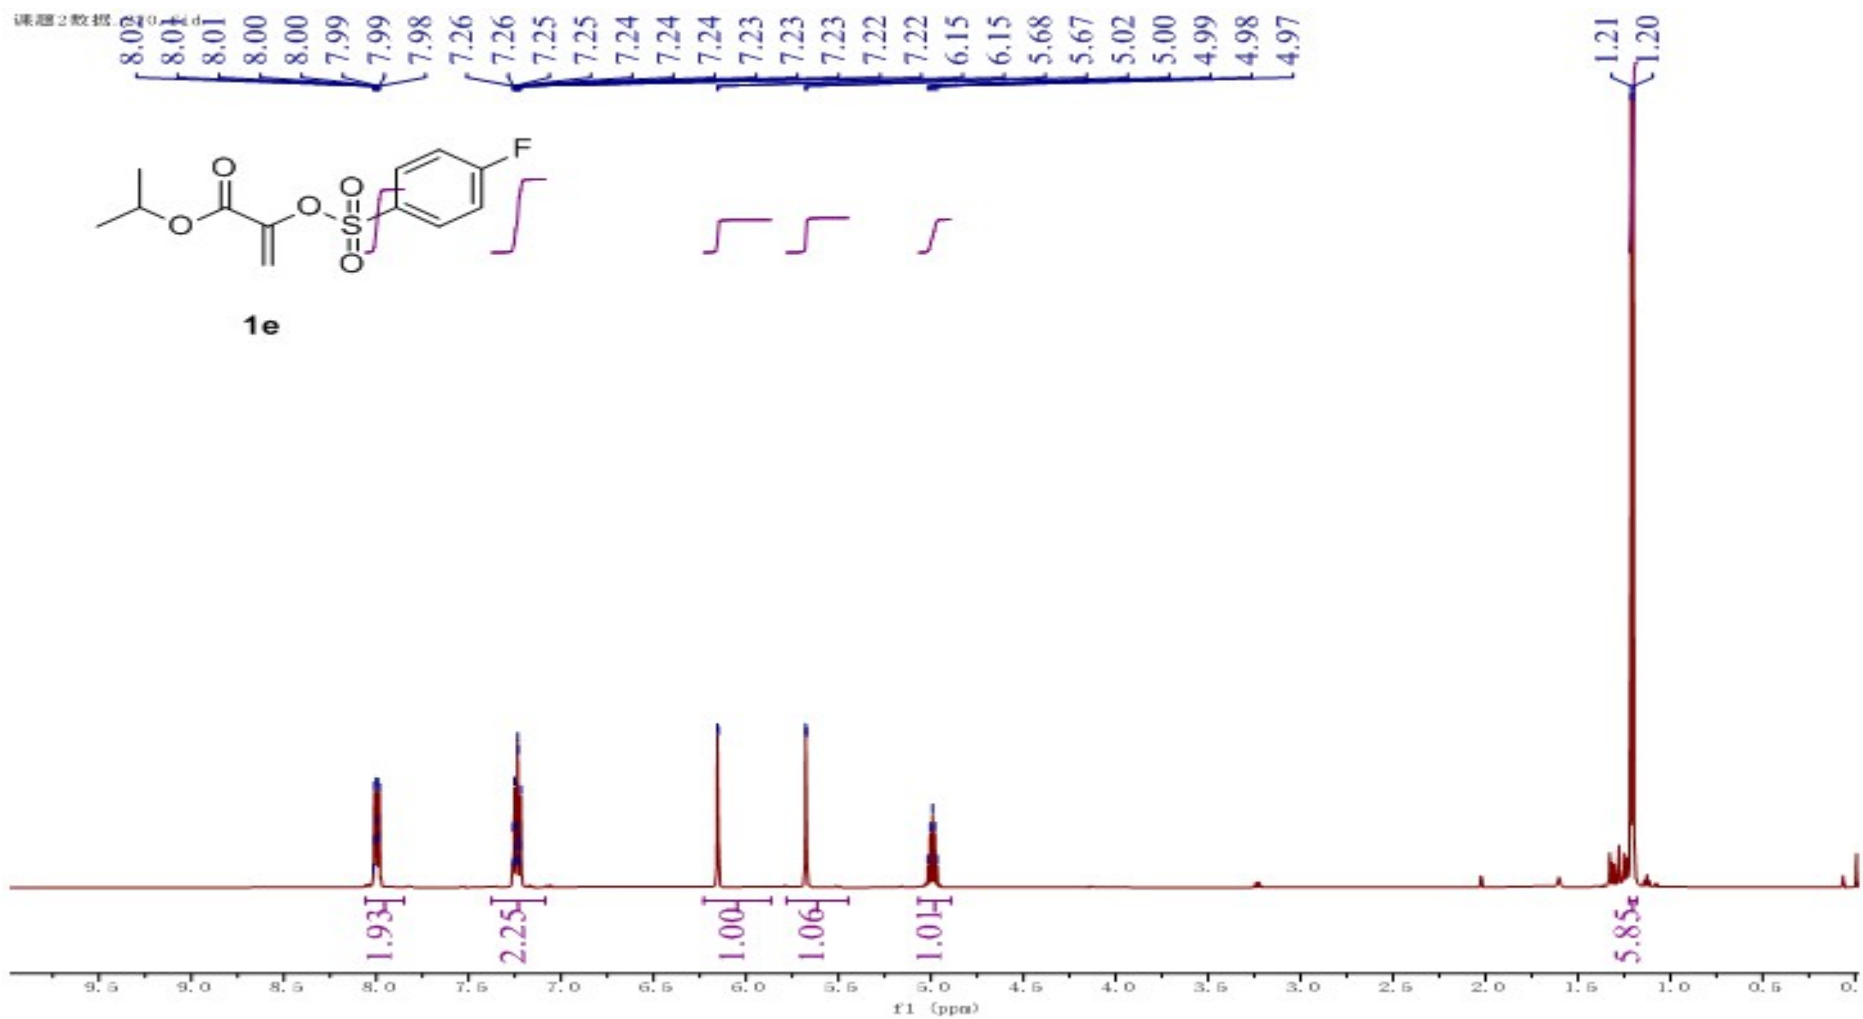

课题2数据\_271.fid

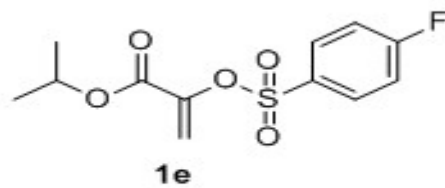

167.13  
165.08  
160.23

143.40  
131.77  
131.75  
131.52  
131.44  
117.04  
116.57  
116.38

77.25  
77.00  
76.75  
70.18

-21.51

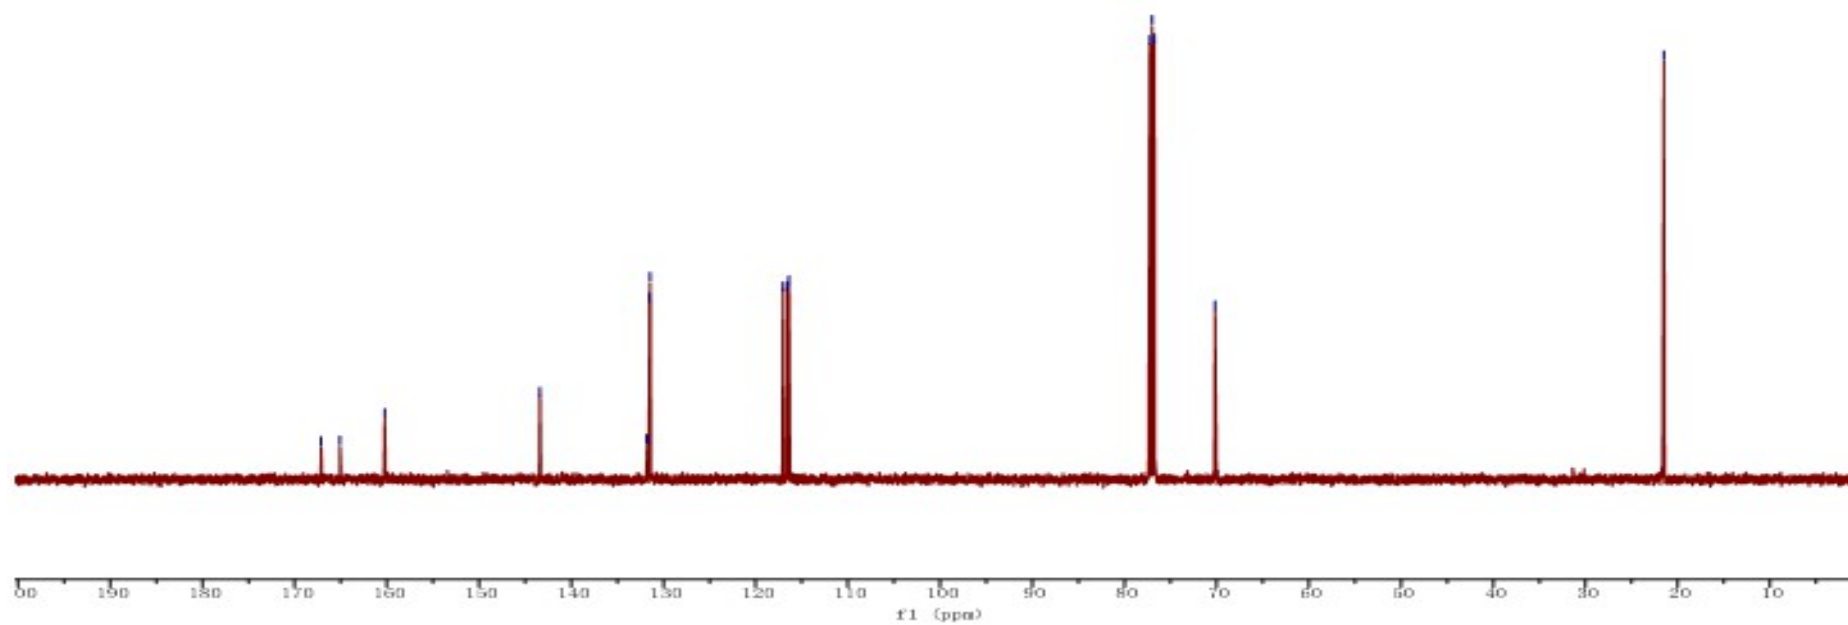

课题2数据\_272.fid

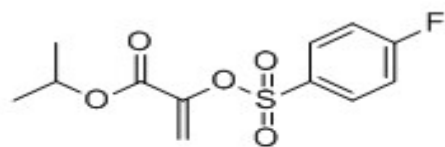

**1e**

--102.00

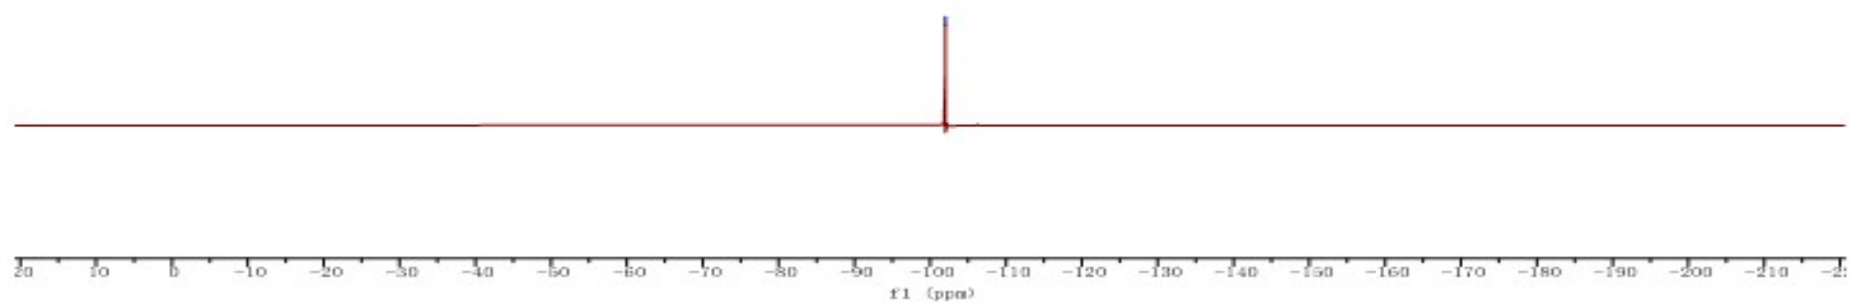

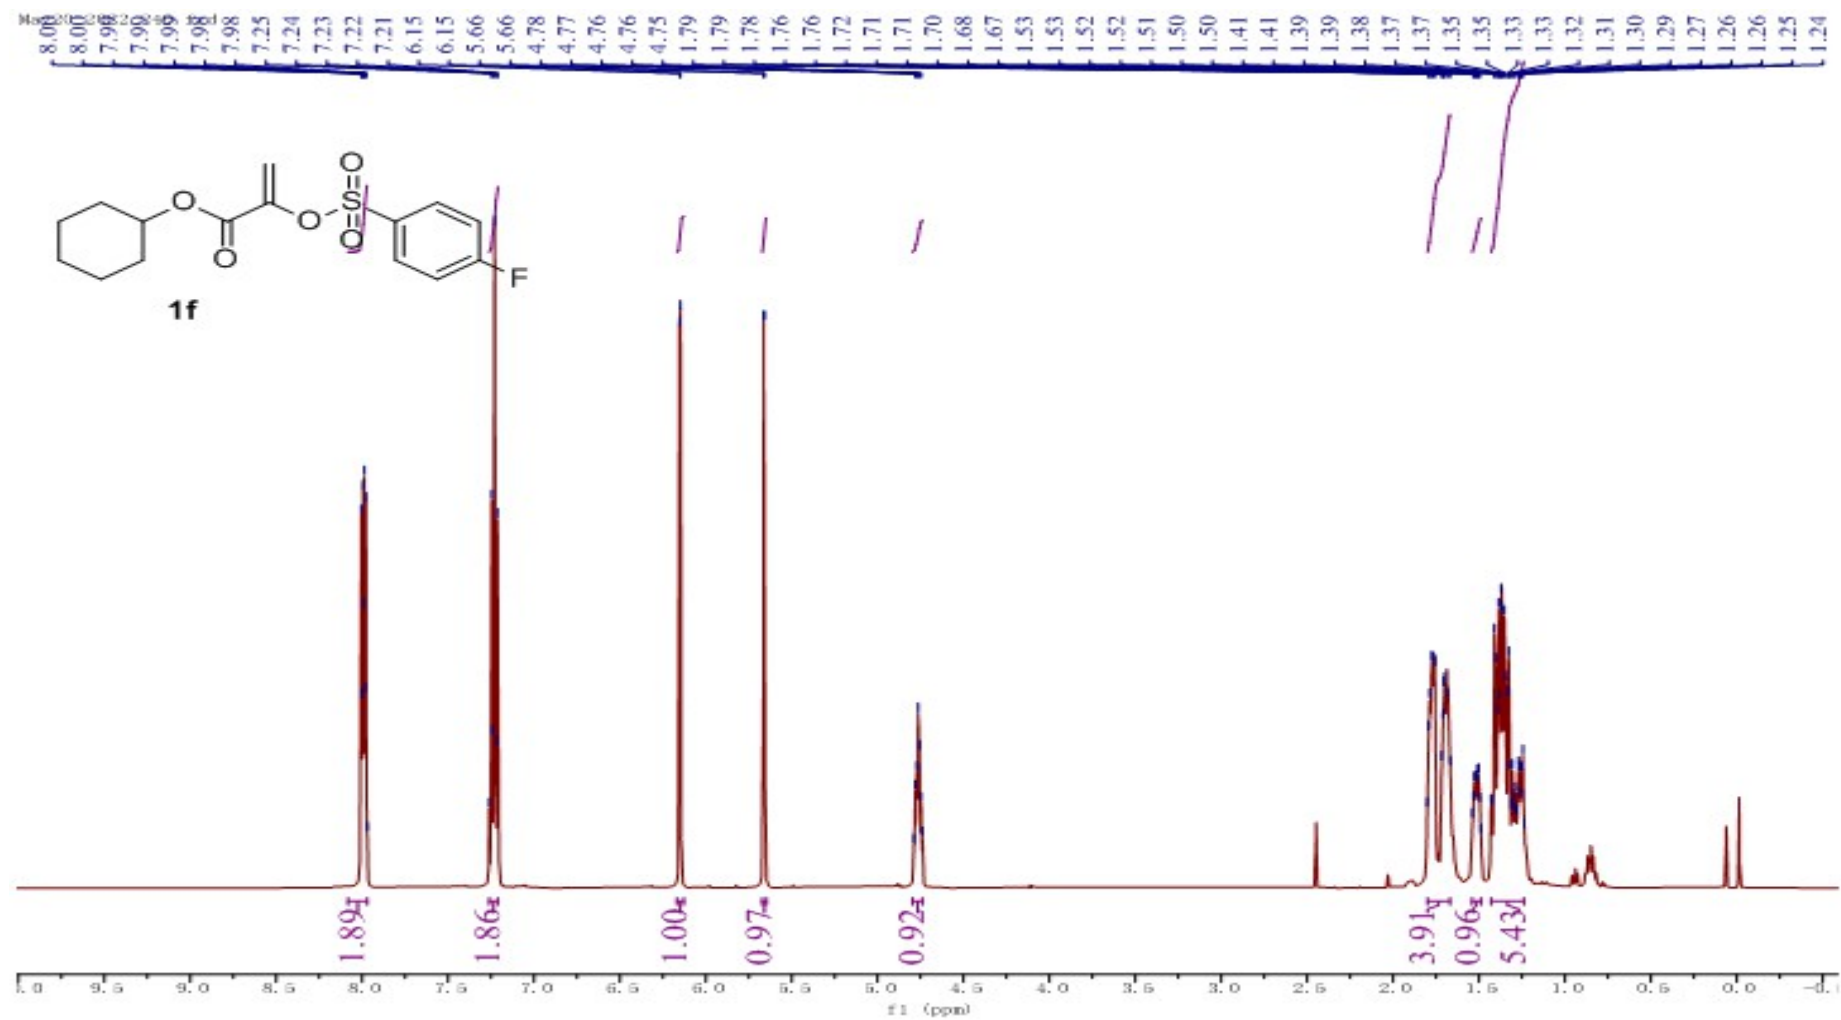

May20-2022, 241, f1.d

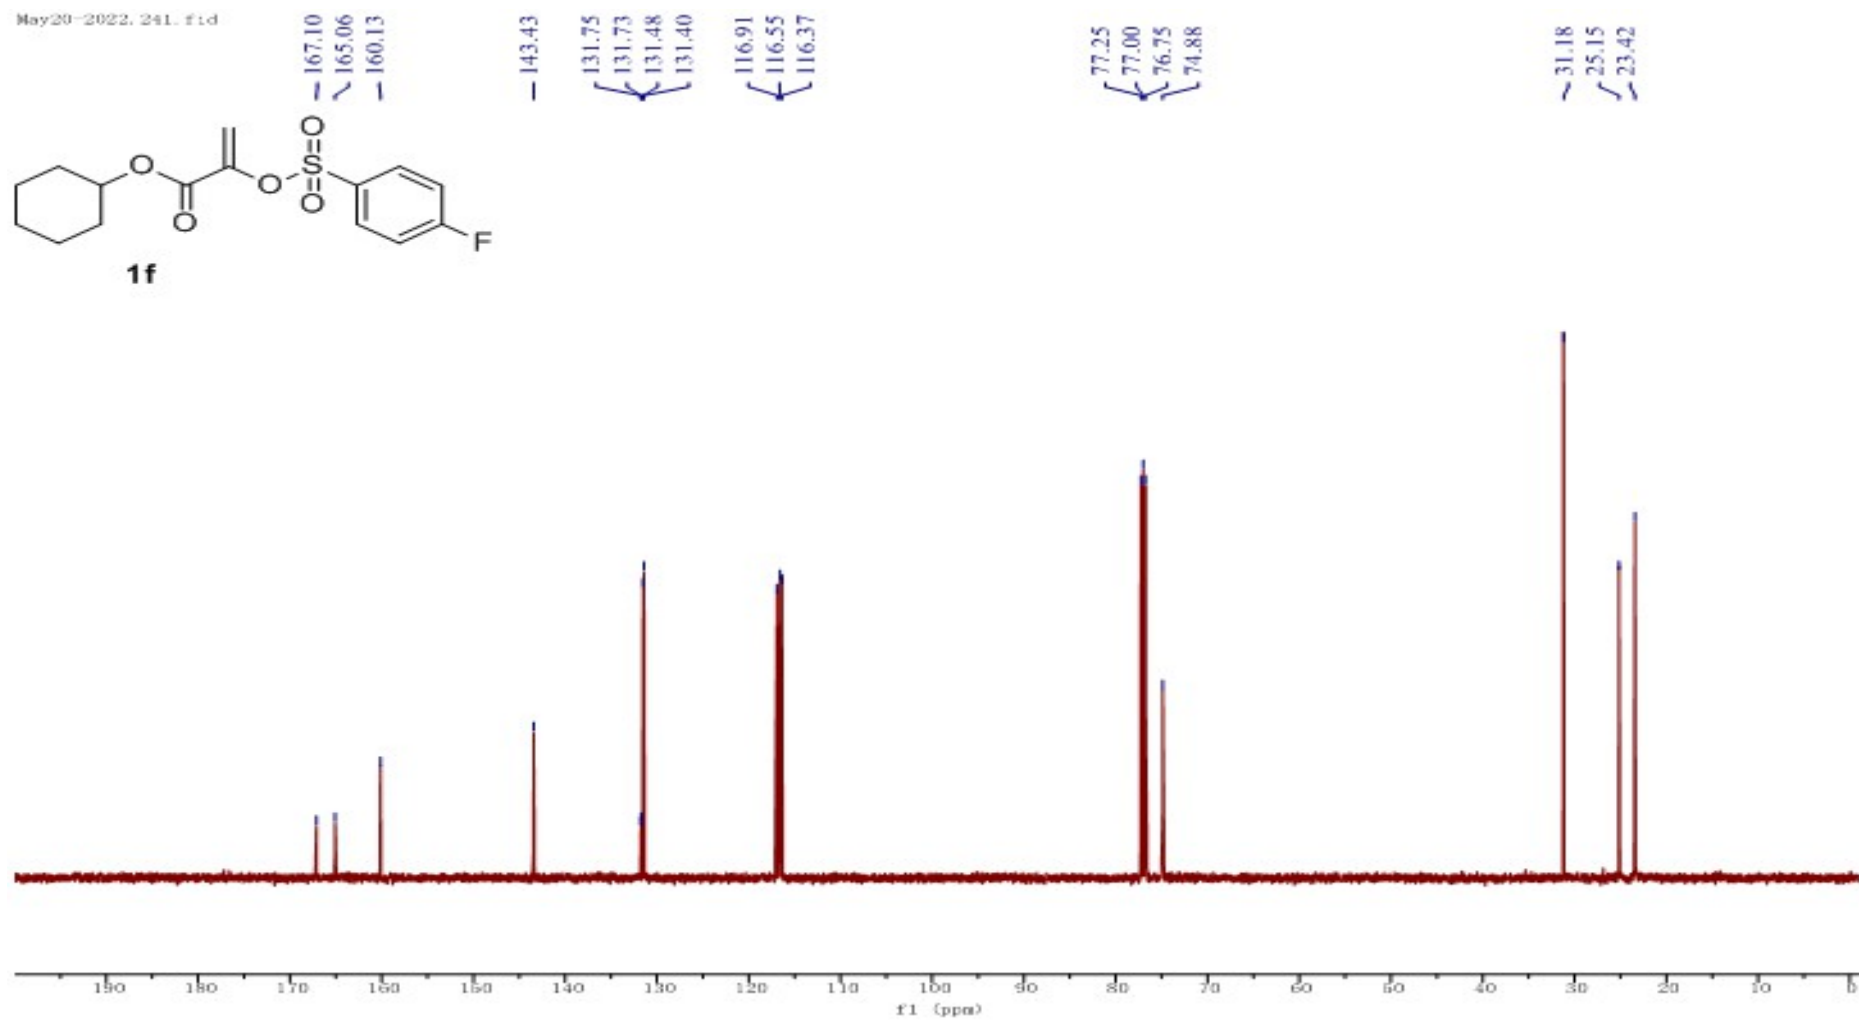



May20-2022, 242, f1.d

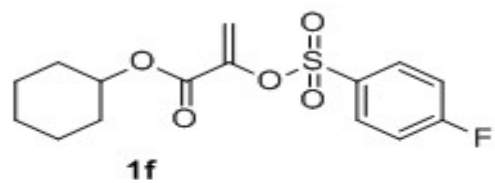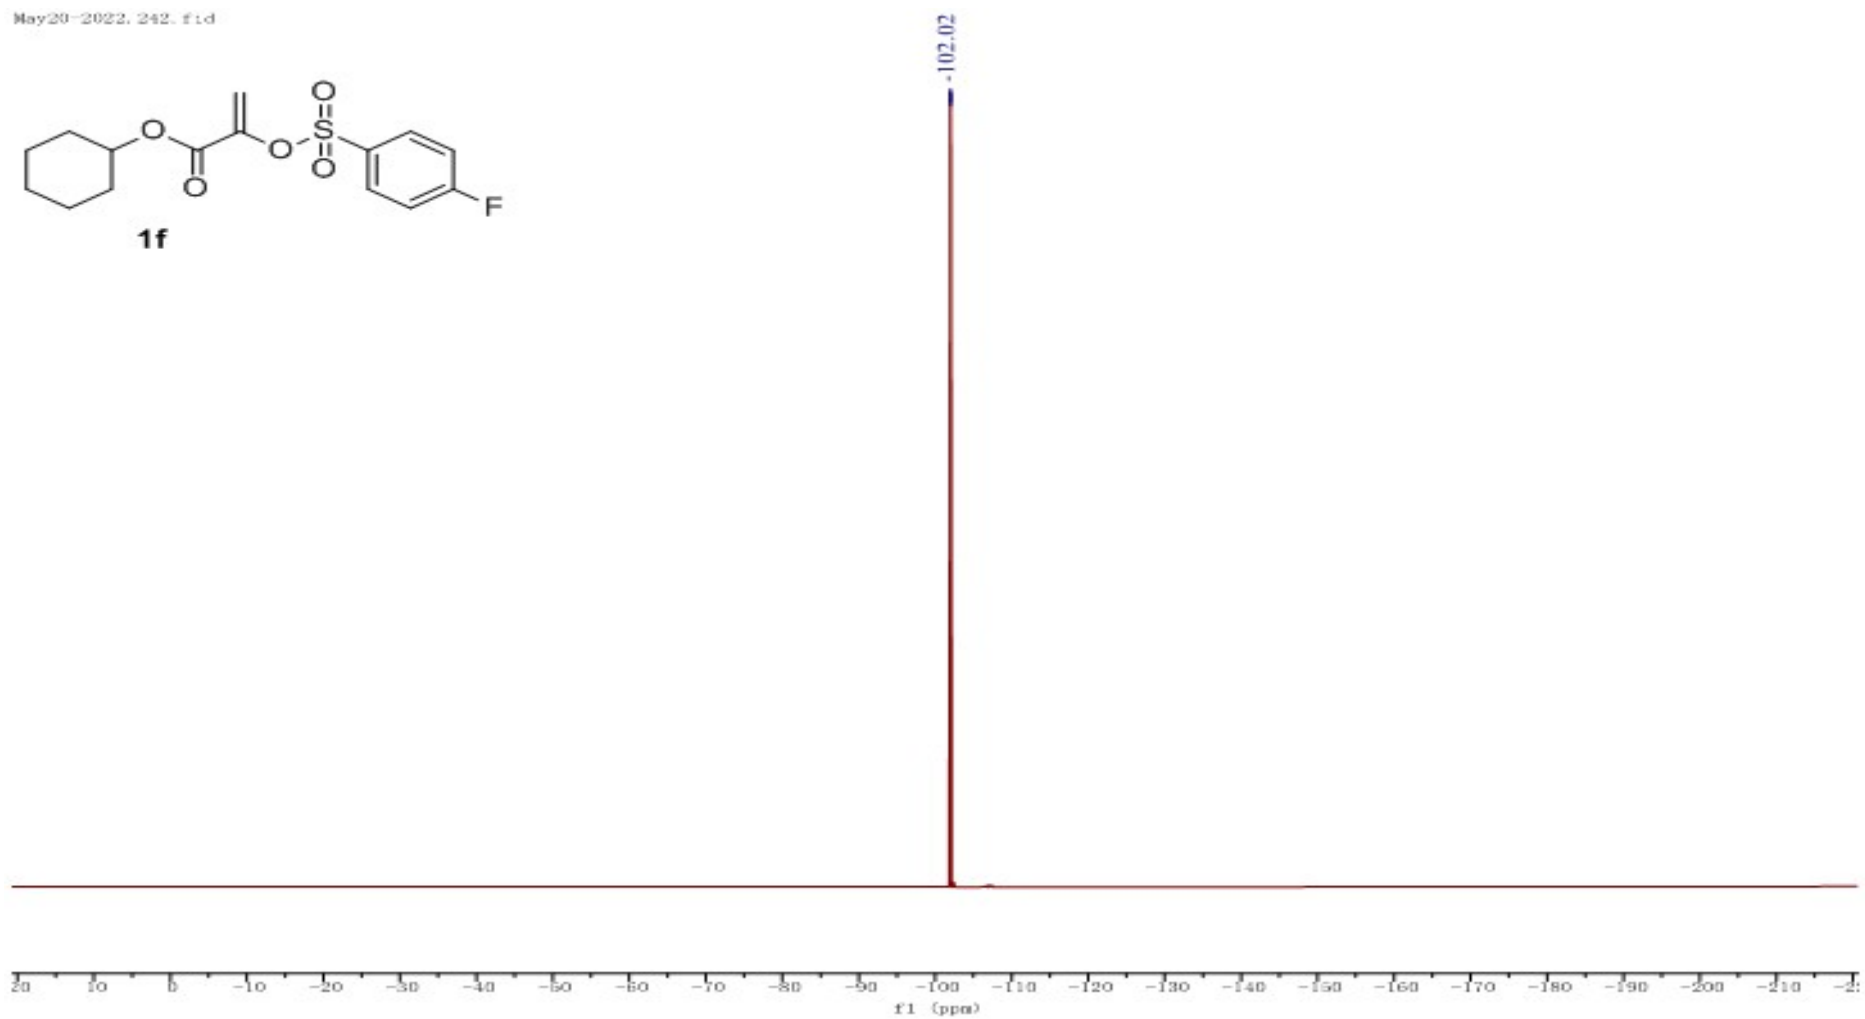

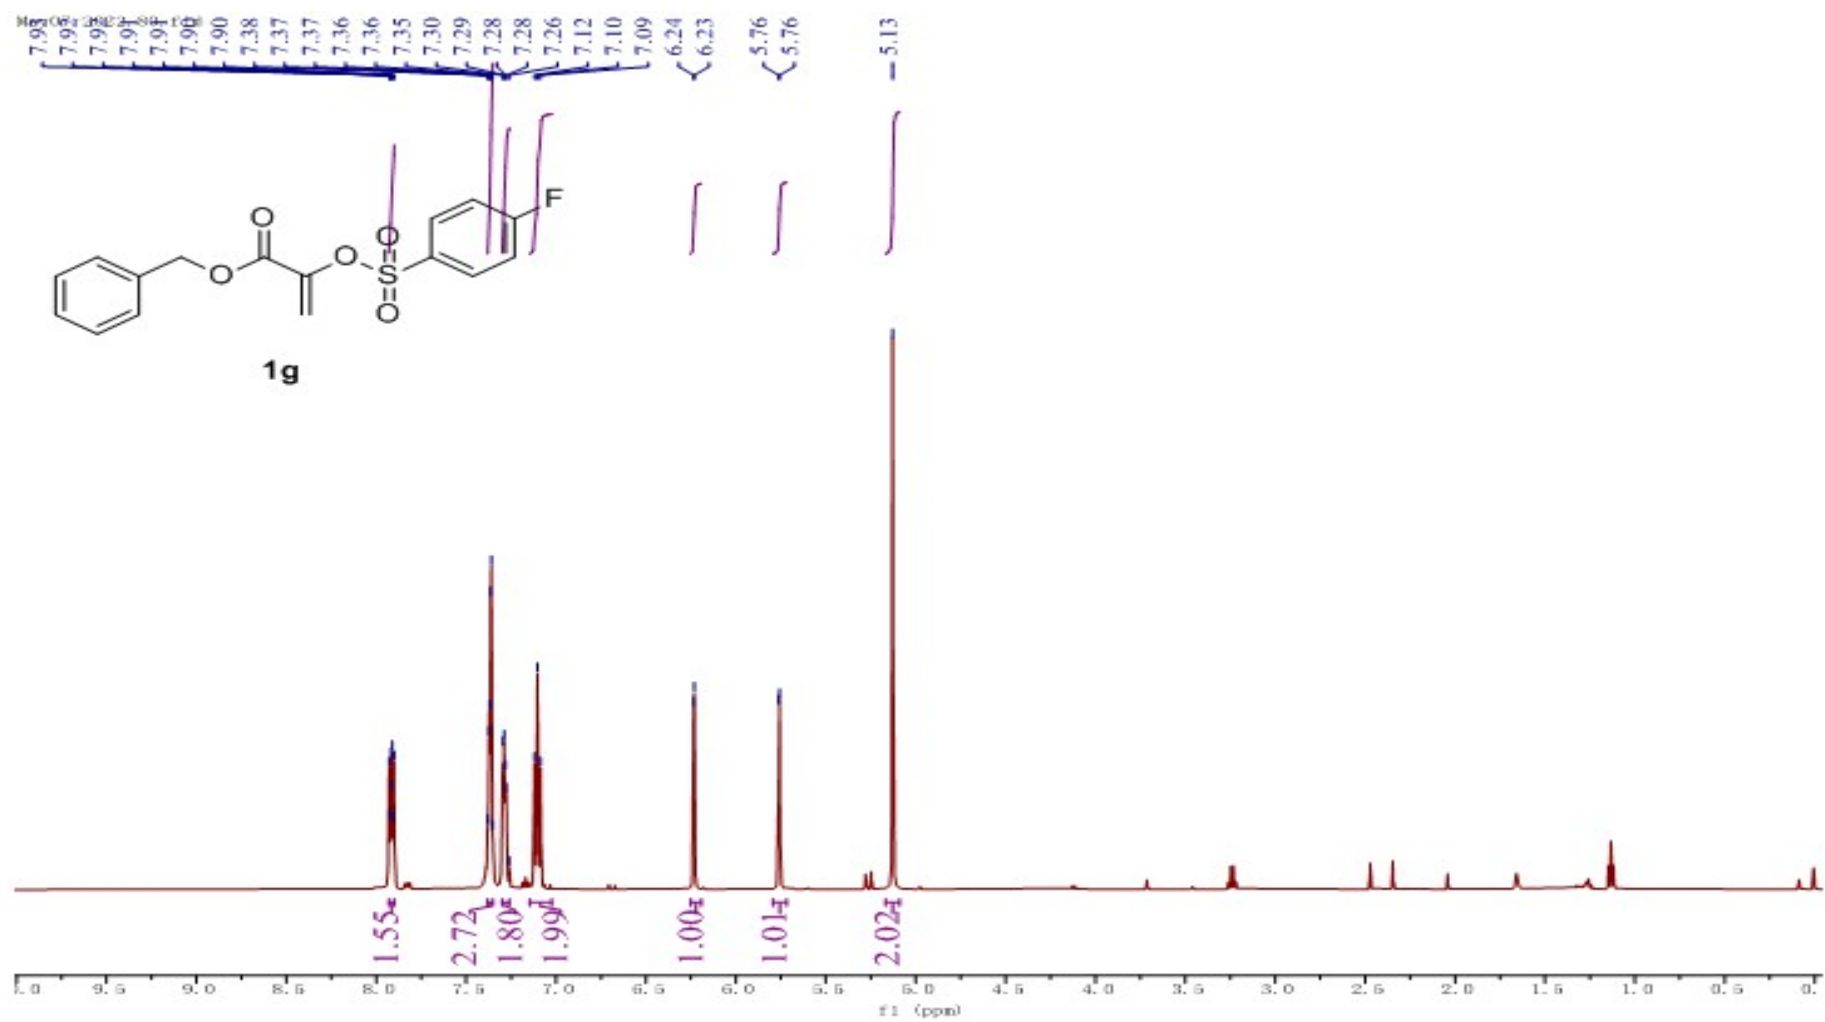

May07 22:21:21

167.02  
164.95  
160.55  
142.77  
134.66  
131.41  
131.40  
131.37  
131.34  
129.56  
129.49  
128.59  
128.57  
128.36  
117.93  
116.48  
116.29  
77.25  
77.00  
76.74  
67.69

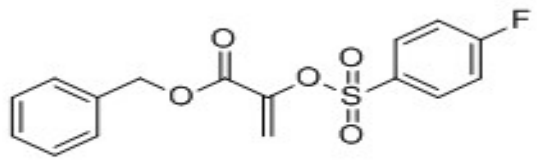

**1g**

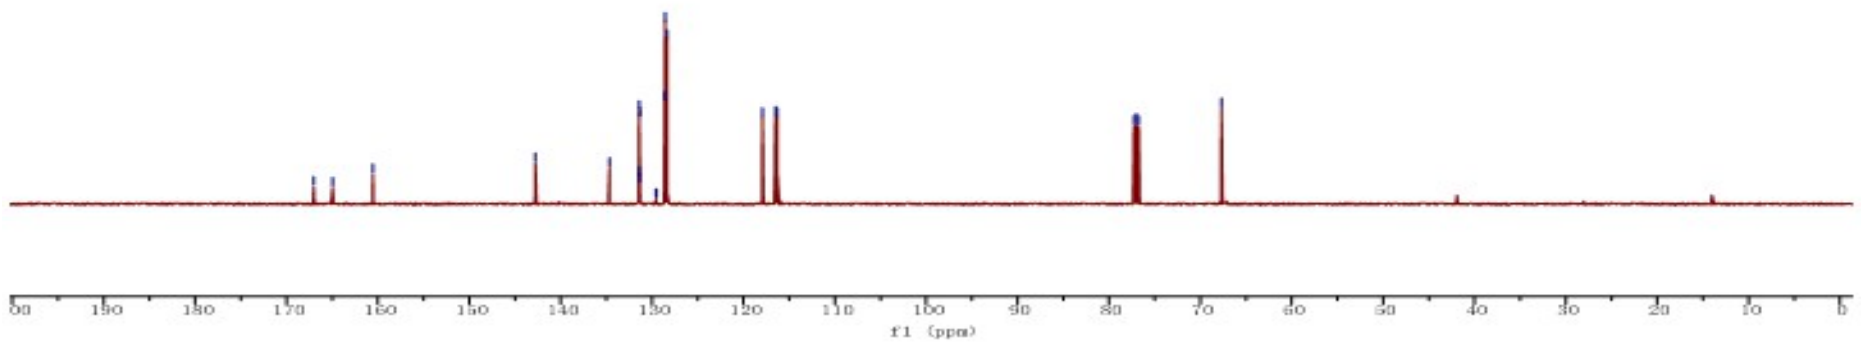

May07-2022, 82, f1d

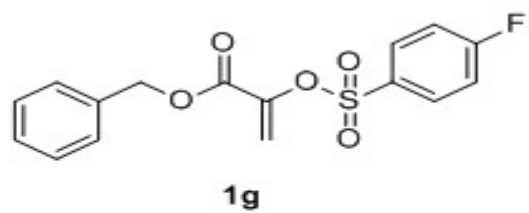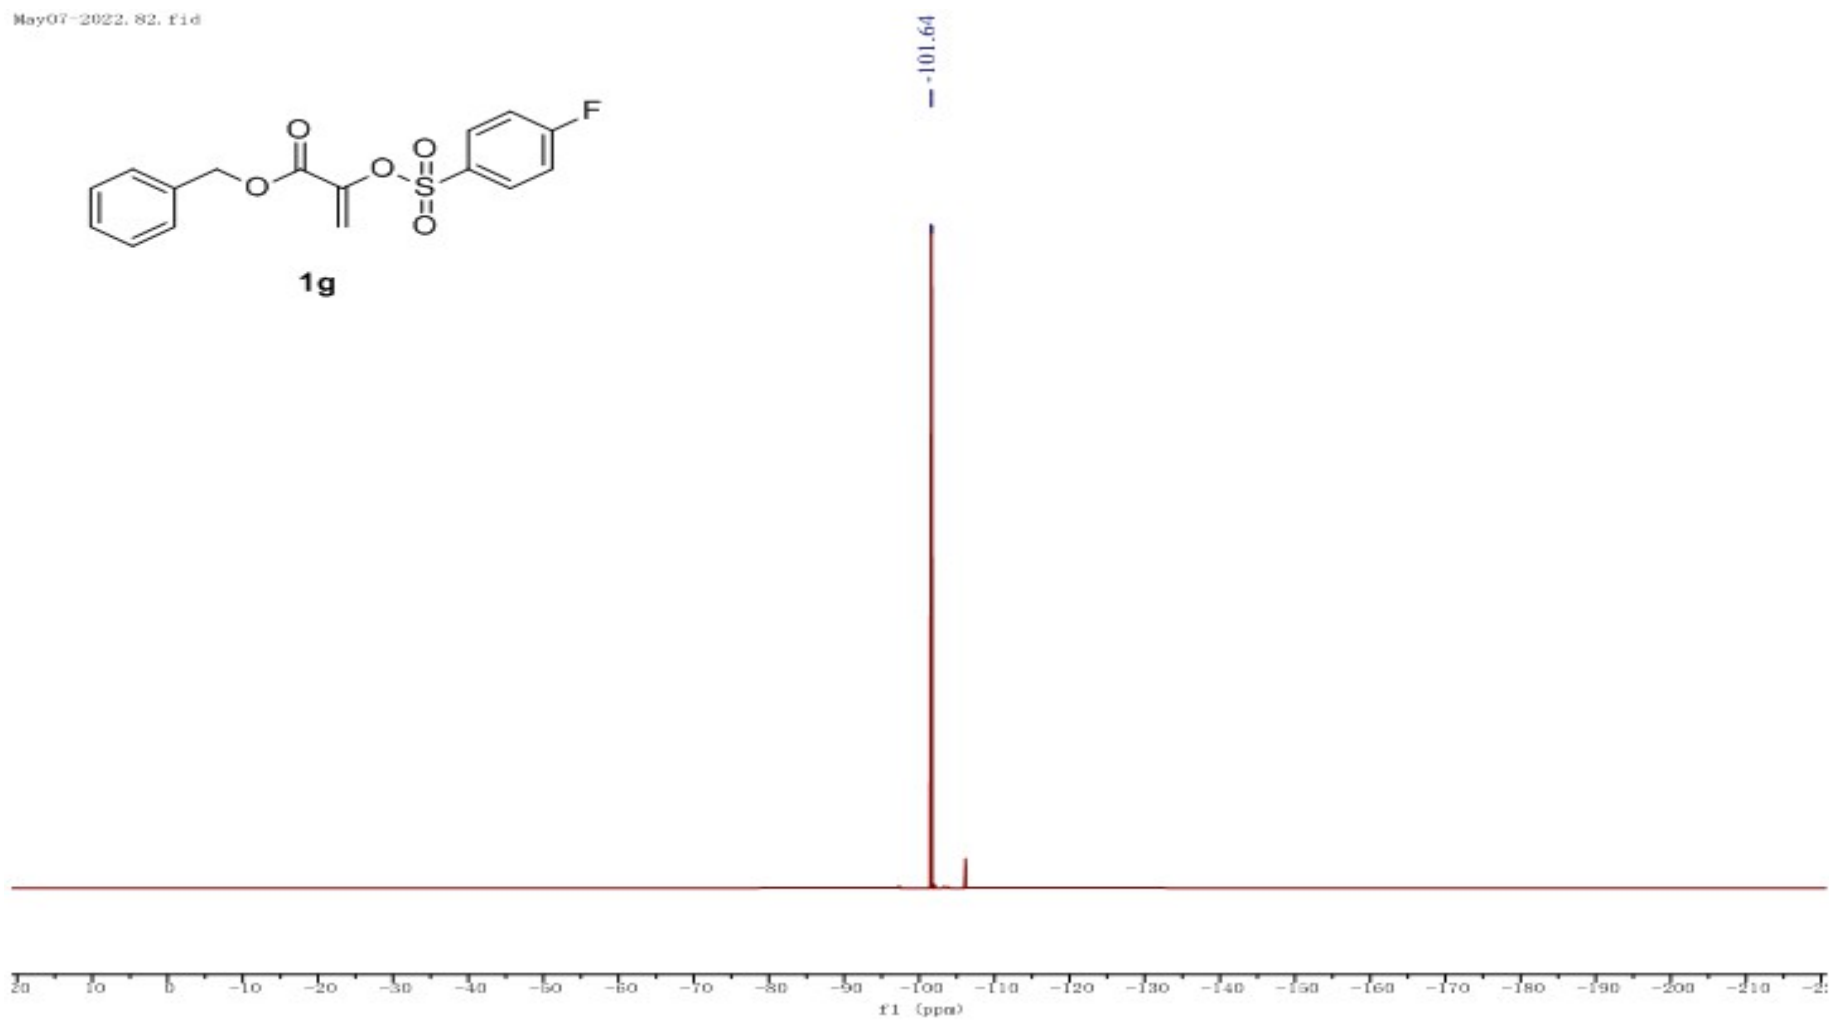

May18-2022, 120, f1

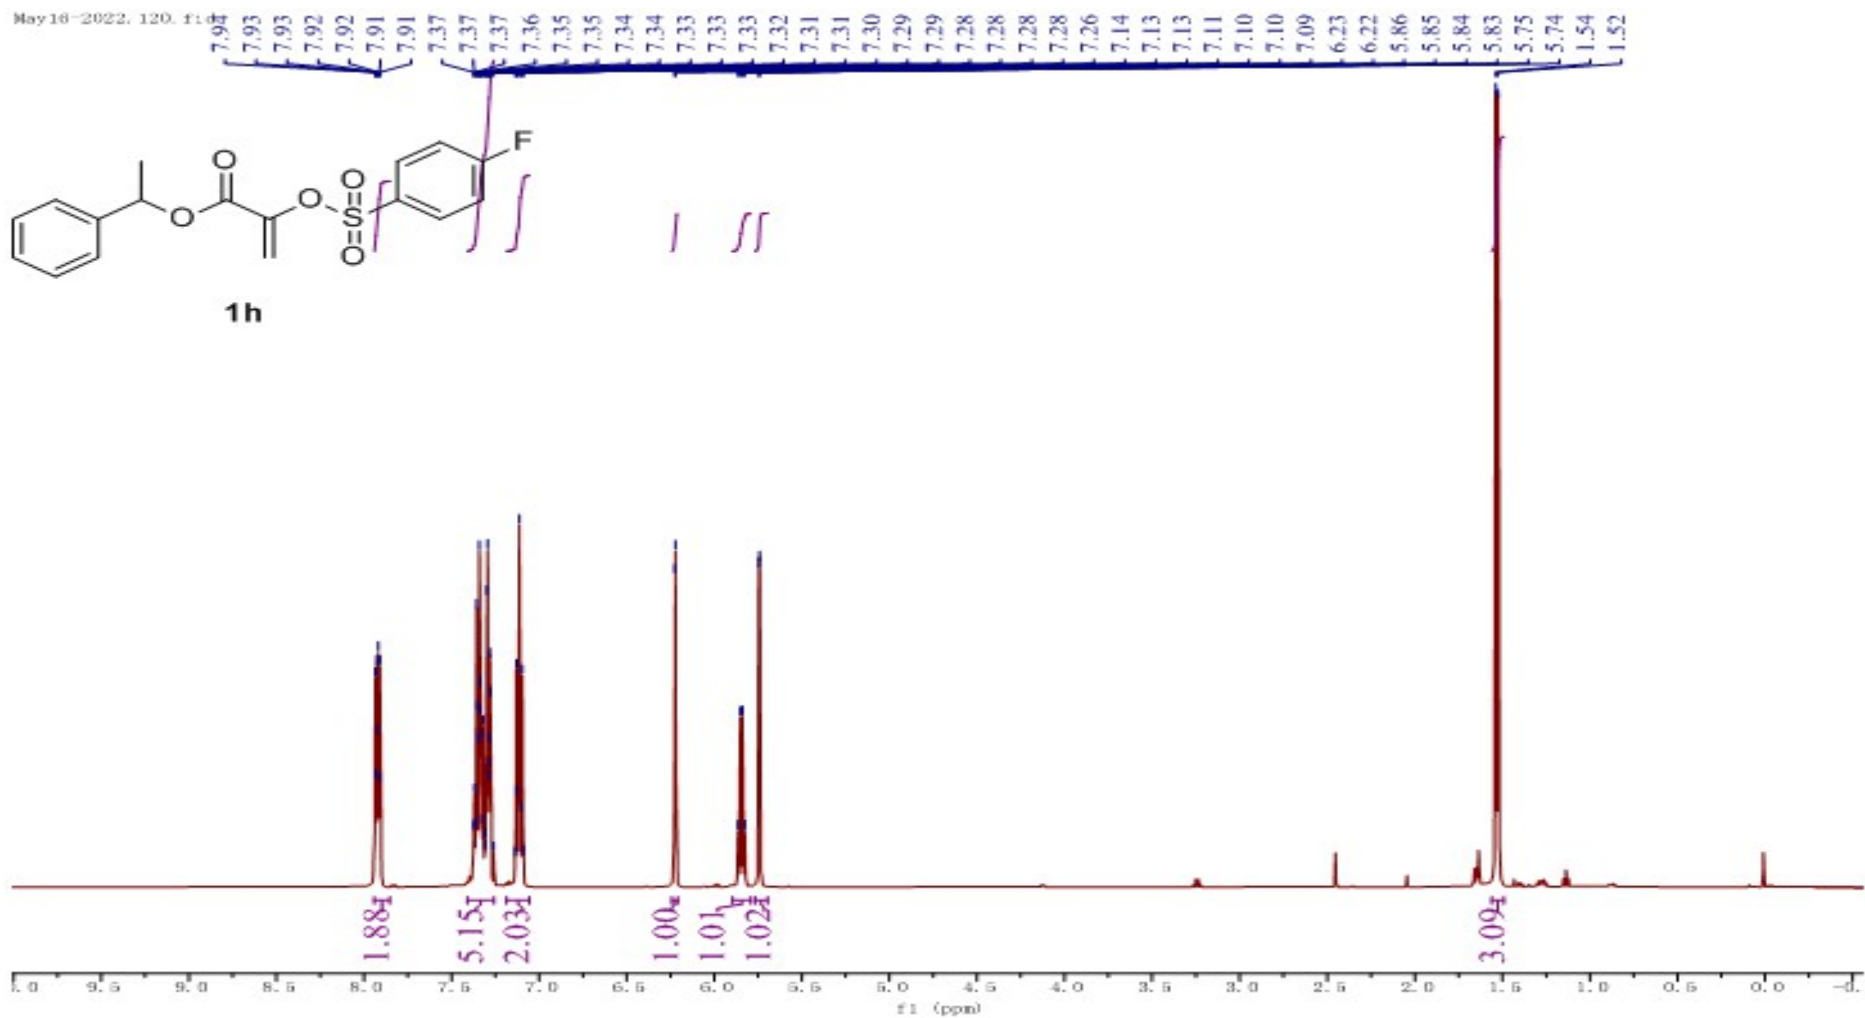

May18-2022, 121, f1.d

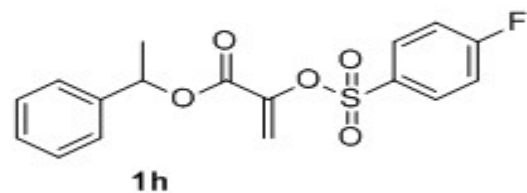

167.02  
164.97  
159.94  
143.11  
140.37  
131.45  
131.42  
131.34  
128.52  
128.21  
126.05  
117.54  
116.48  
116.30

77.25  
77.00  
76.74  
74.56

-21.81

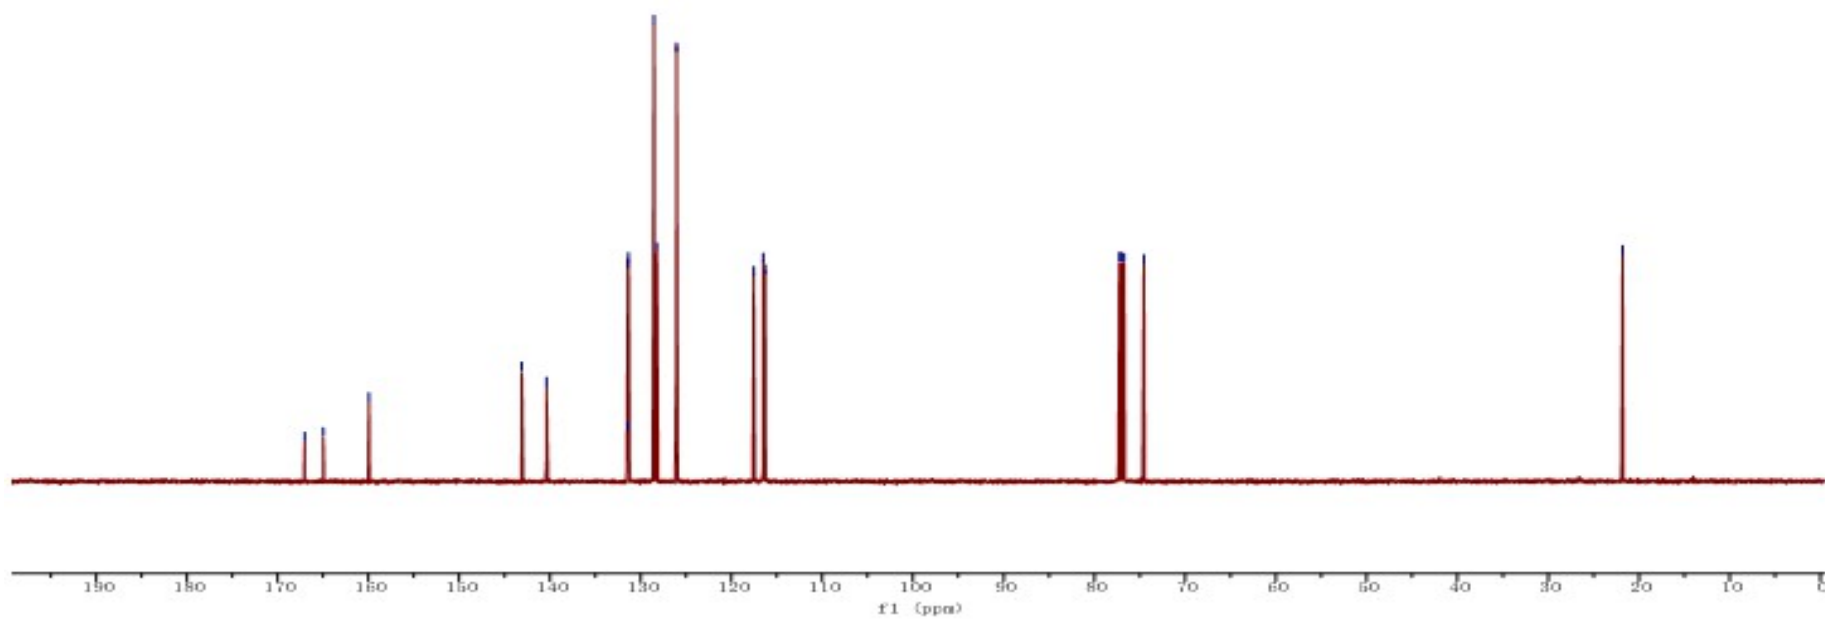

May18-2022, 122, f1.d

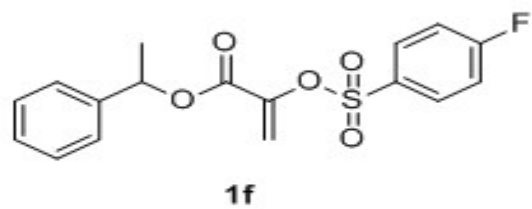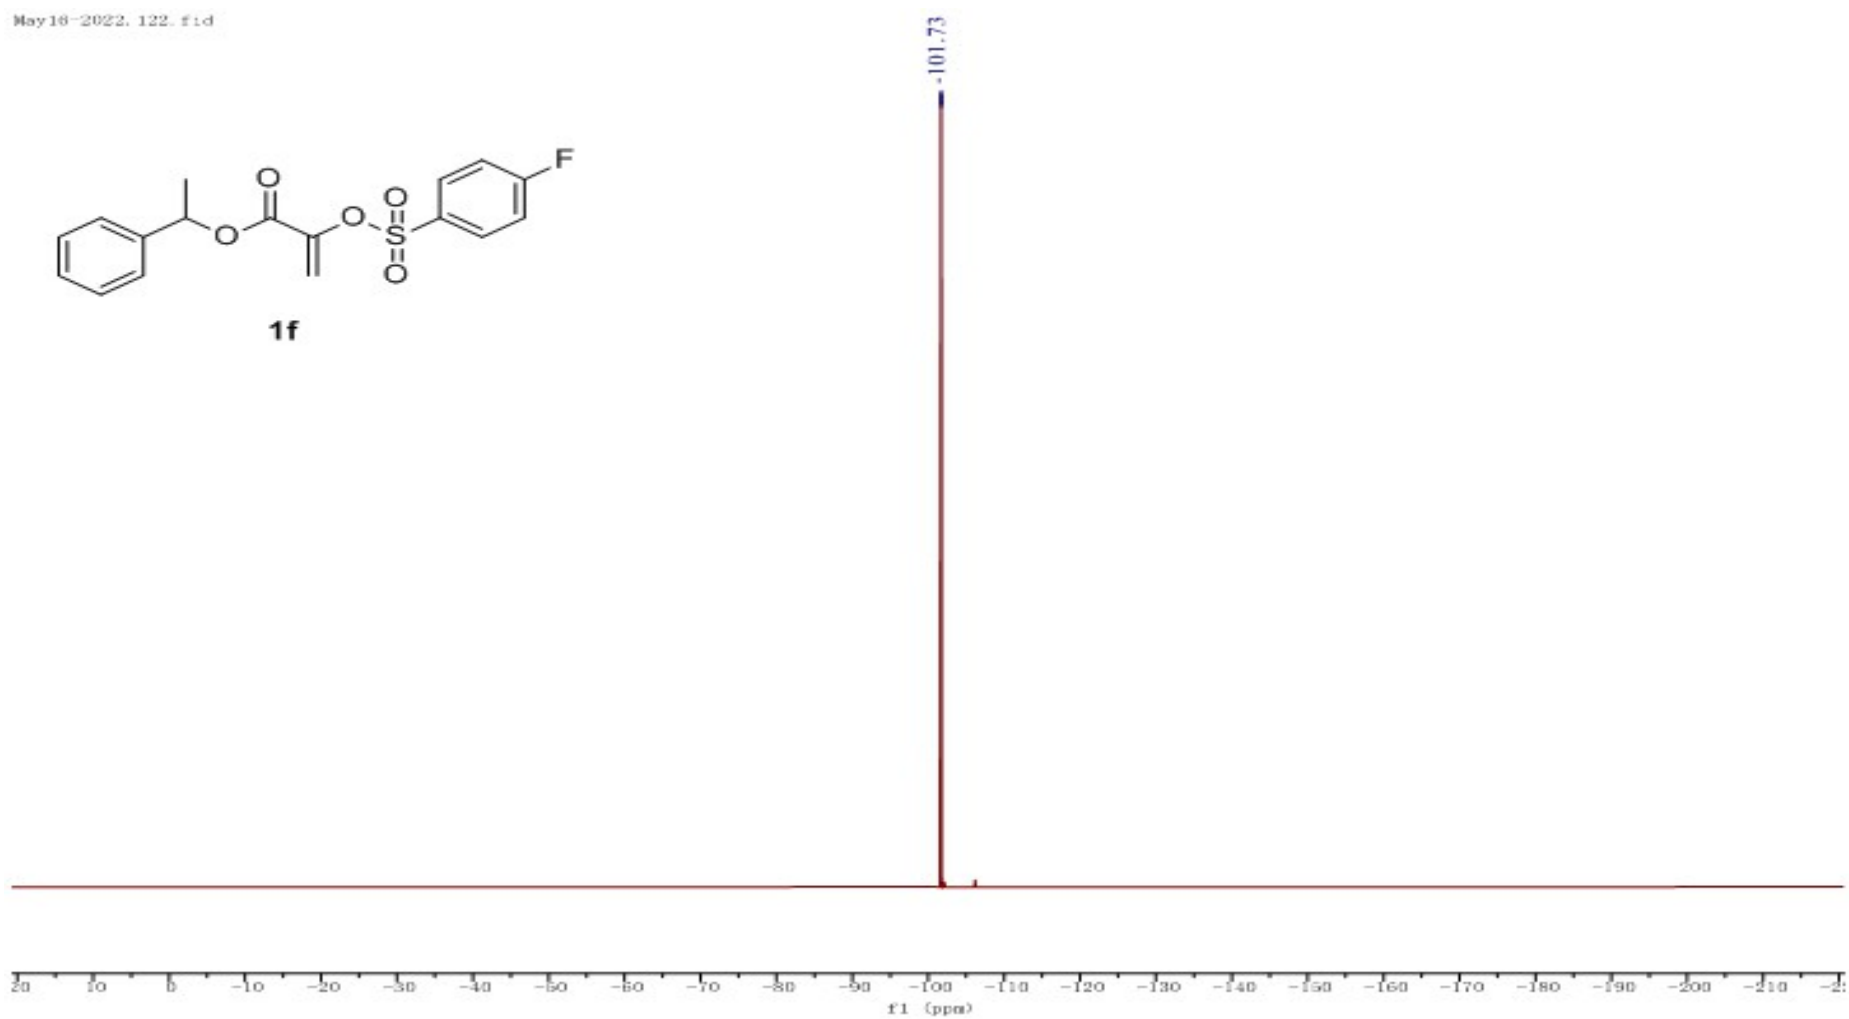

Jun08-2022, 210, f1.d

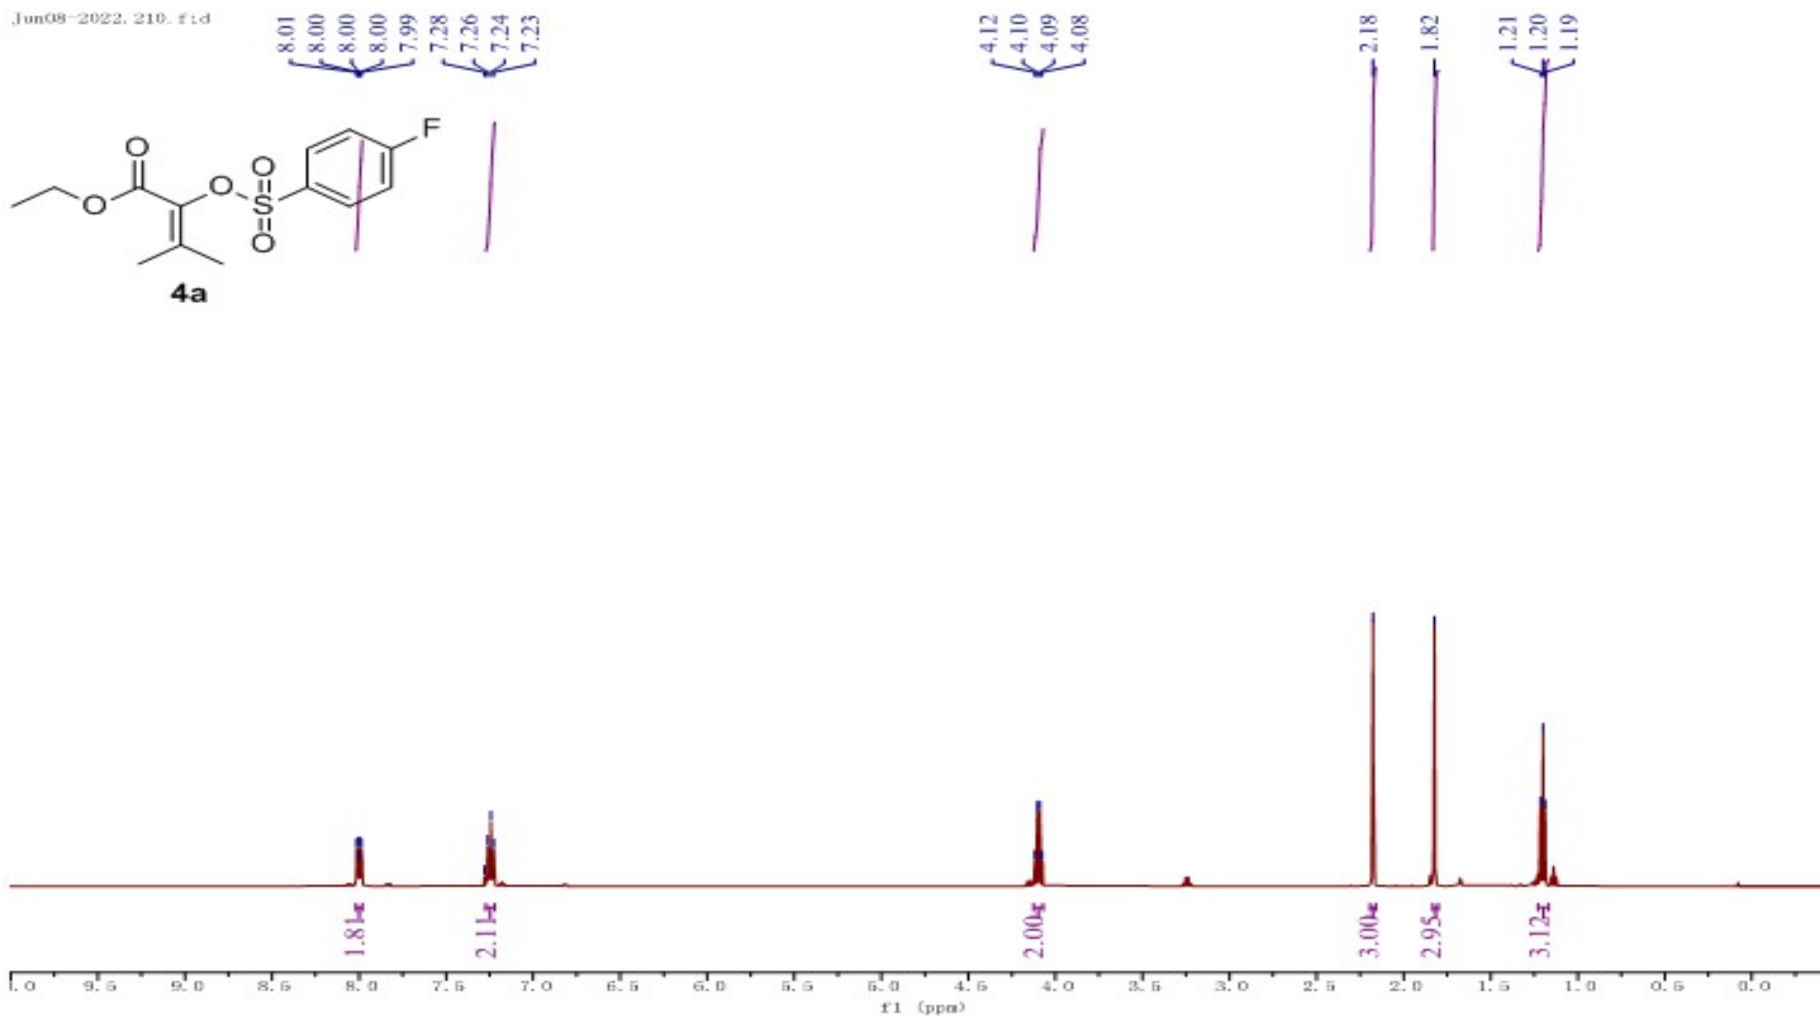



Jun08-2022\_211.fid

166.89  
164.85  
162.03

144.48  
132.91  
132.80  
131.14  
131.07  
116.41  
116.22

77.26  
77.00  
76.75

61.12

41.96

21.33  
20.37  
13.91

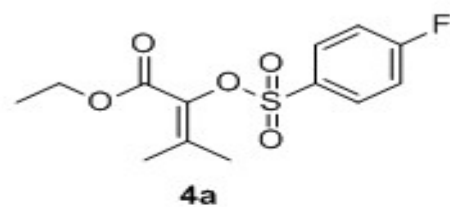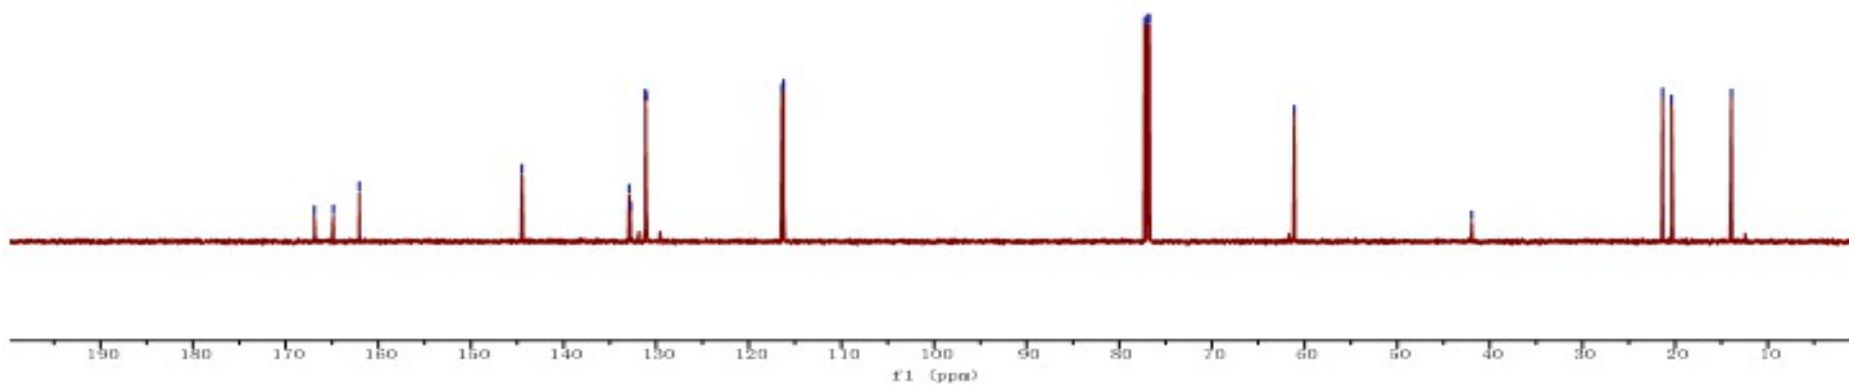

Jun08-2022, 212, f1.d

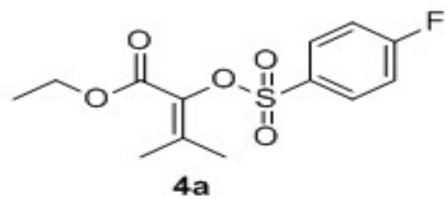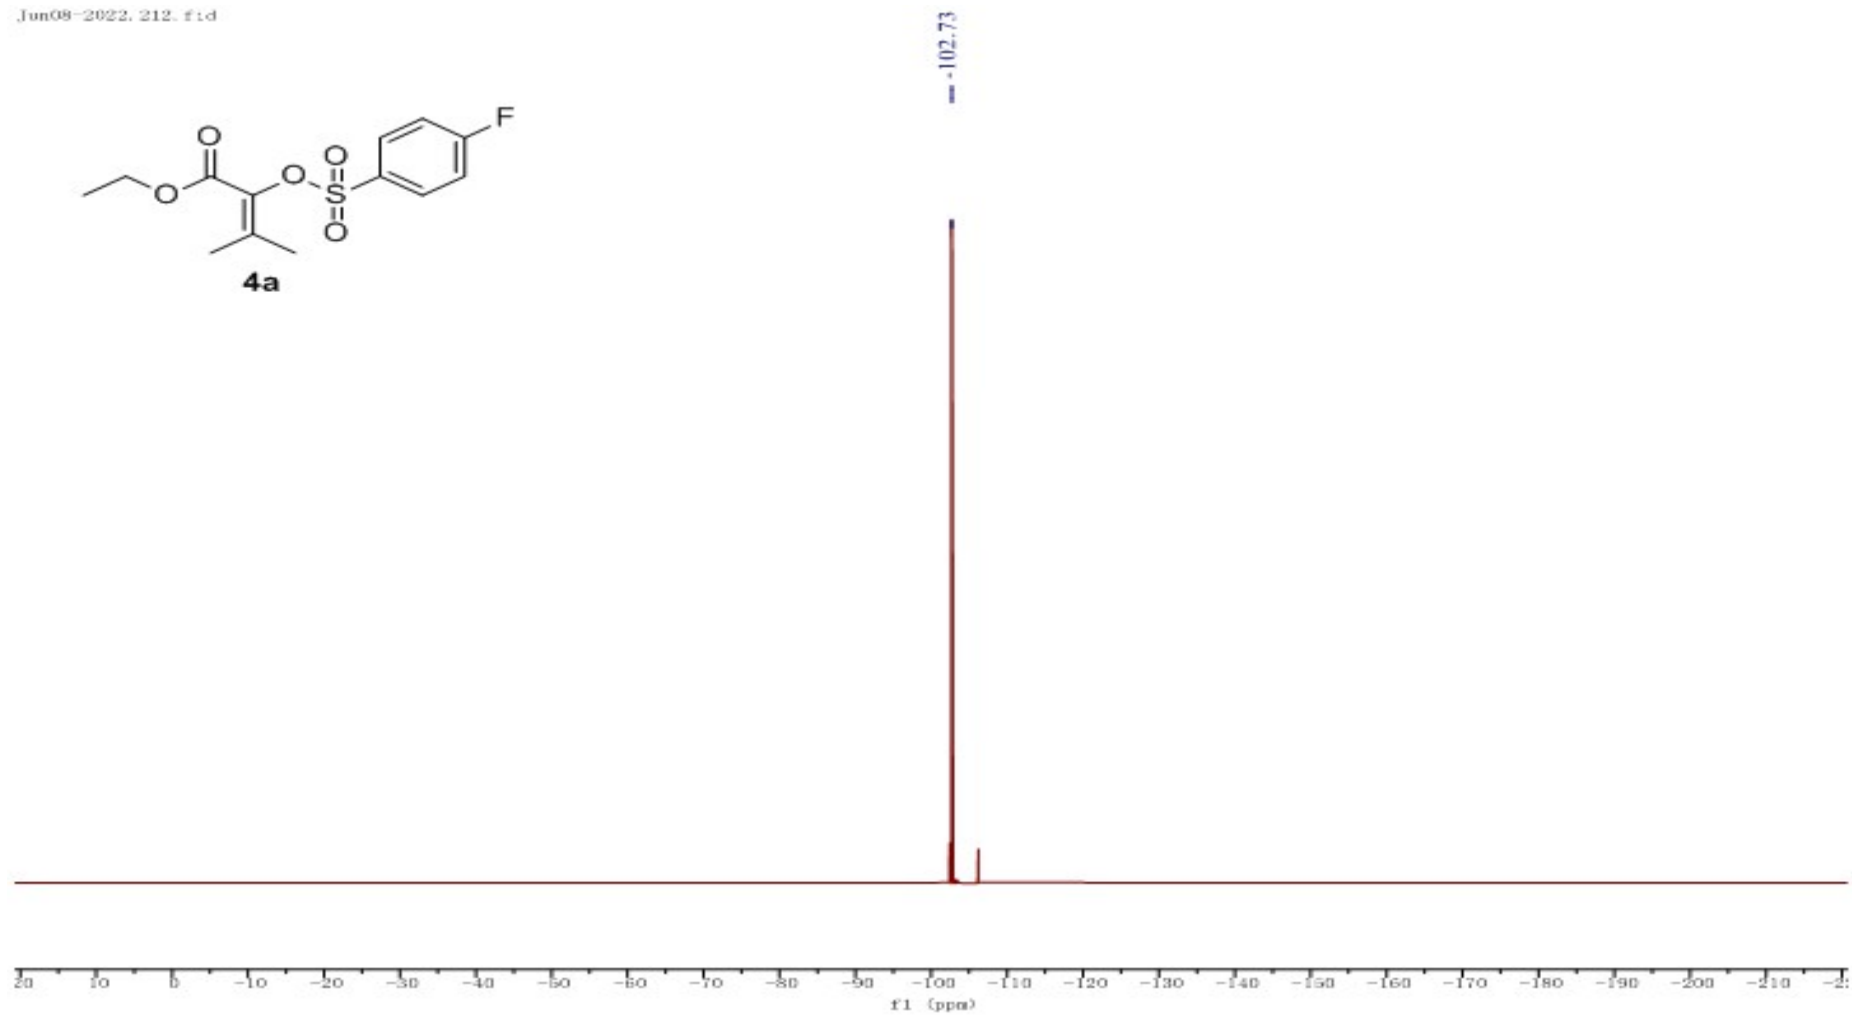

Jun28-2022, 250.

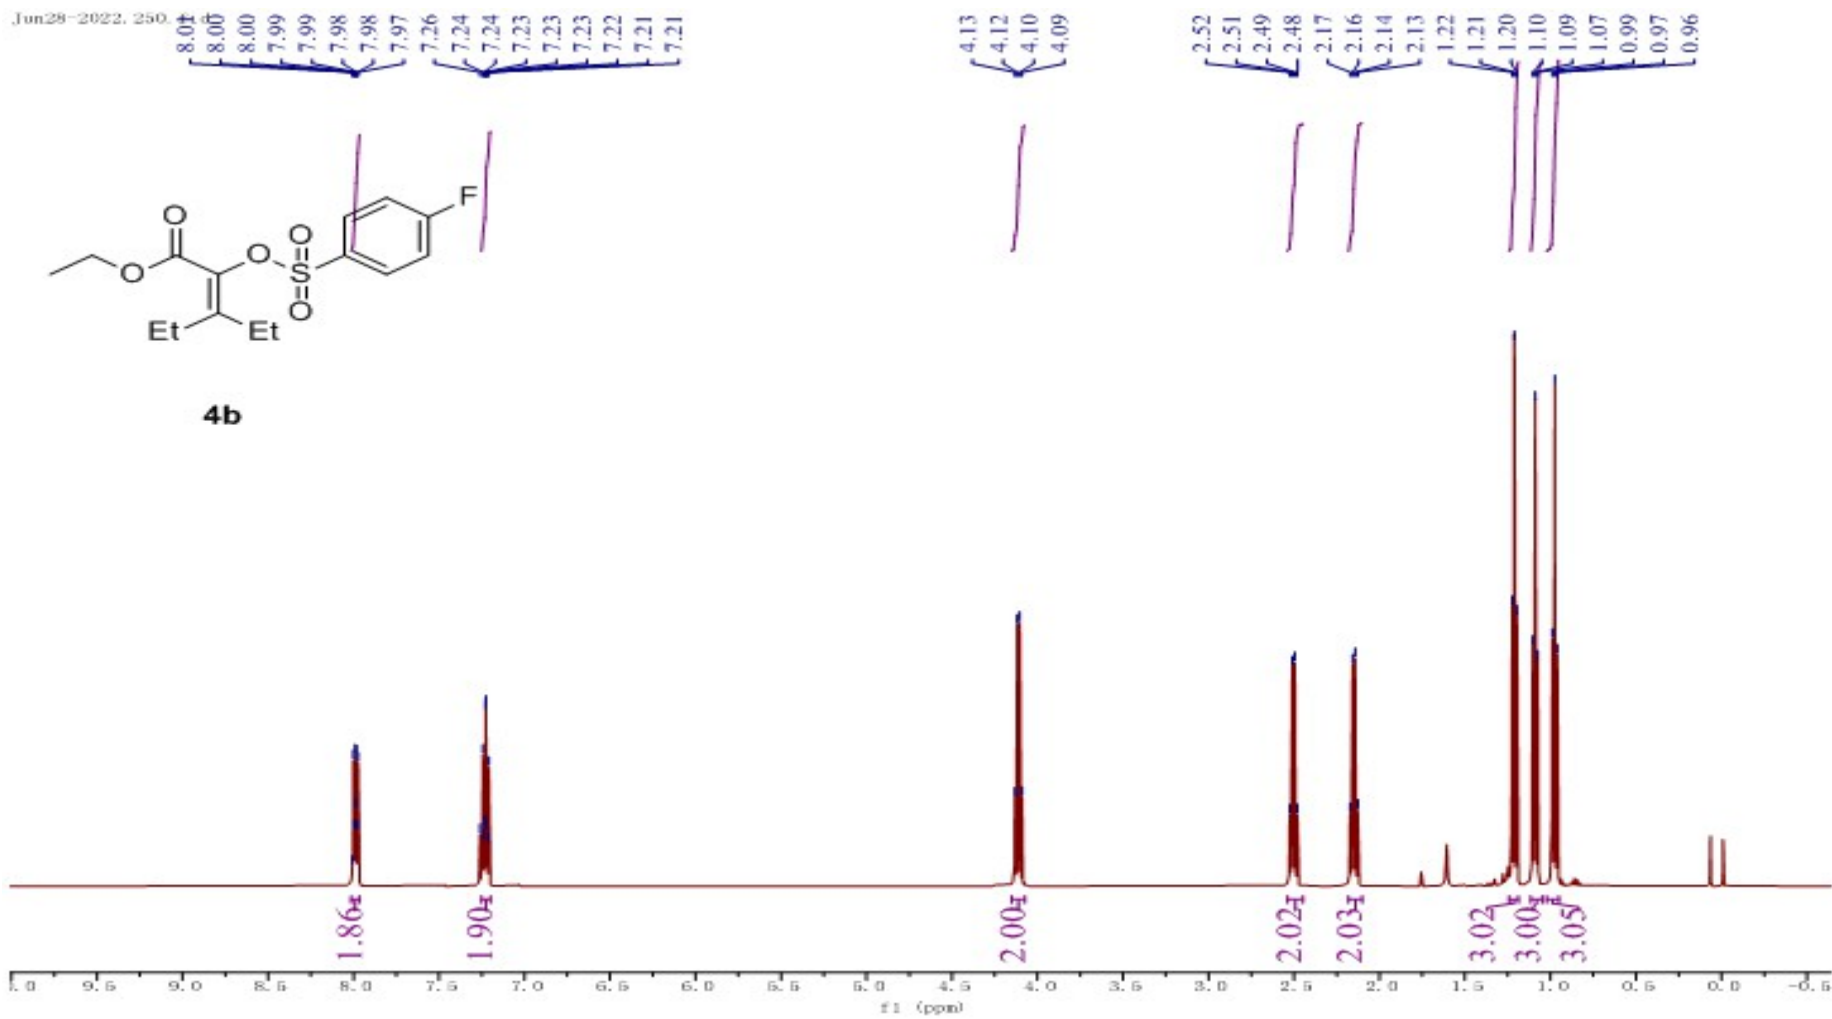

Jun28-2022\_251.f1d

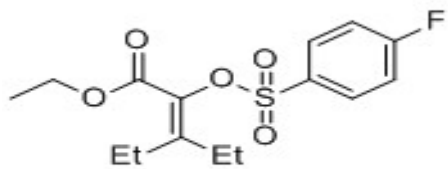

4b

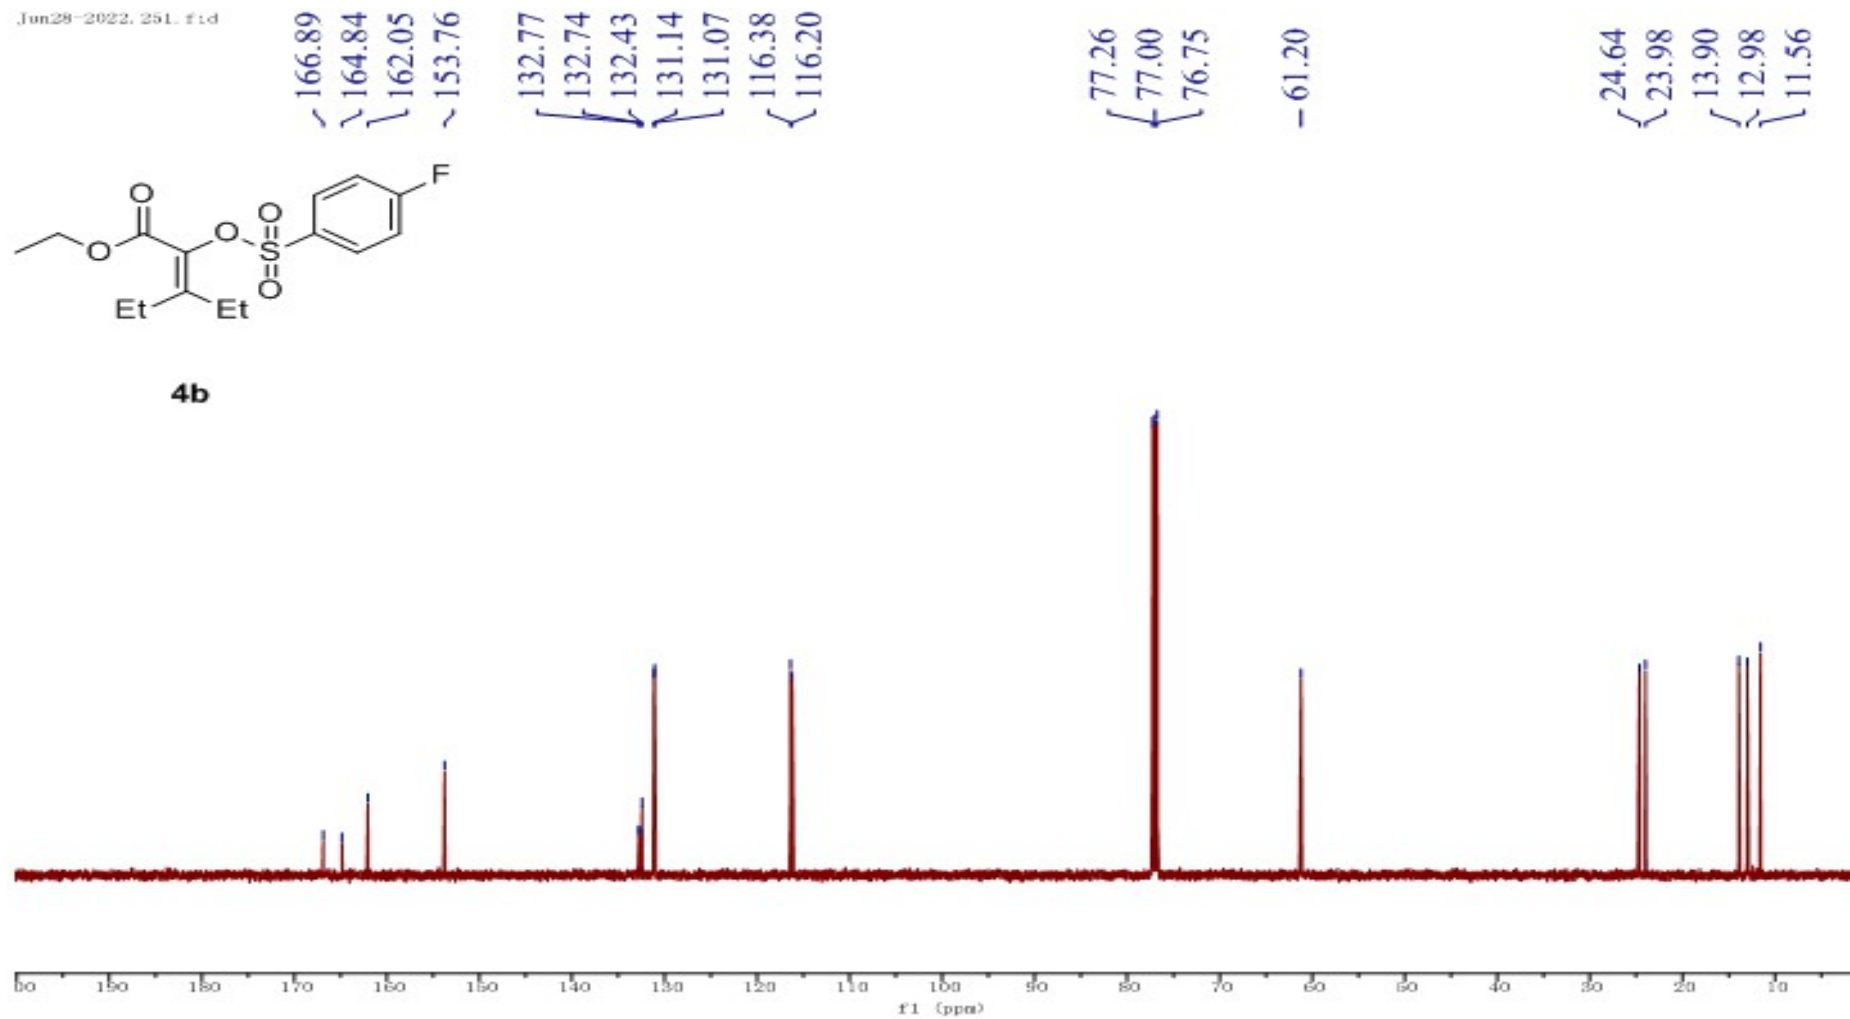

Jun28-2022, 252, f1.d

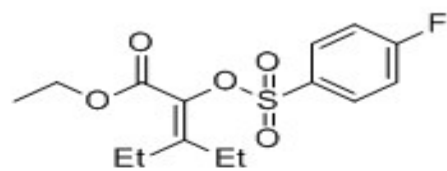

**4b**

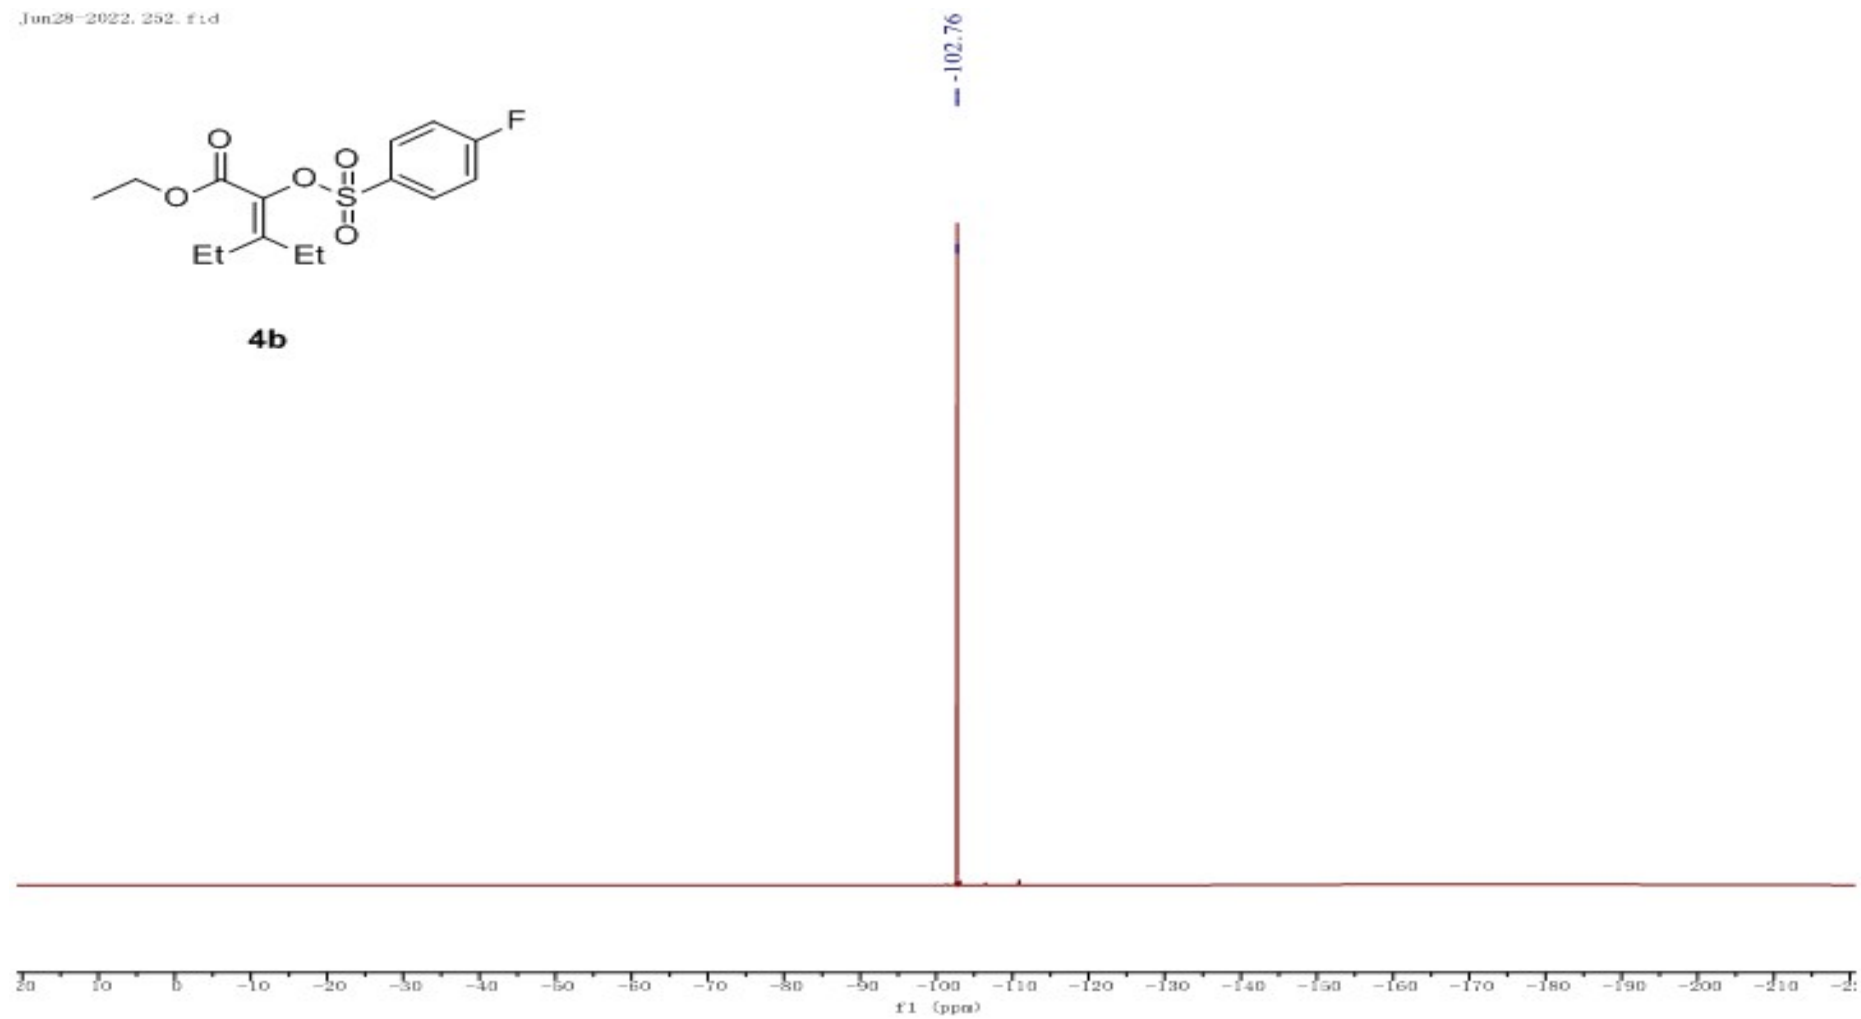

Jun18-2022\_20.f1d

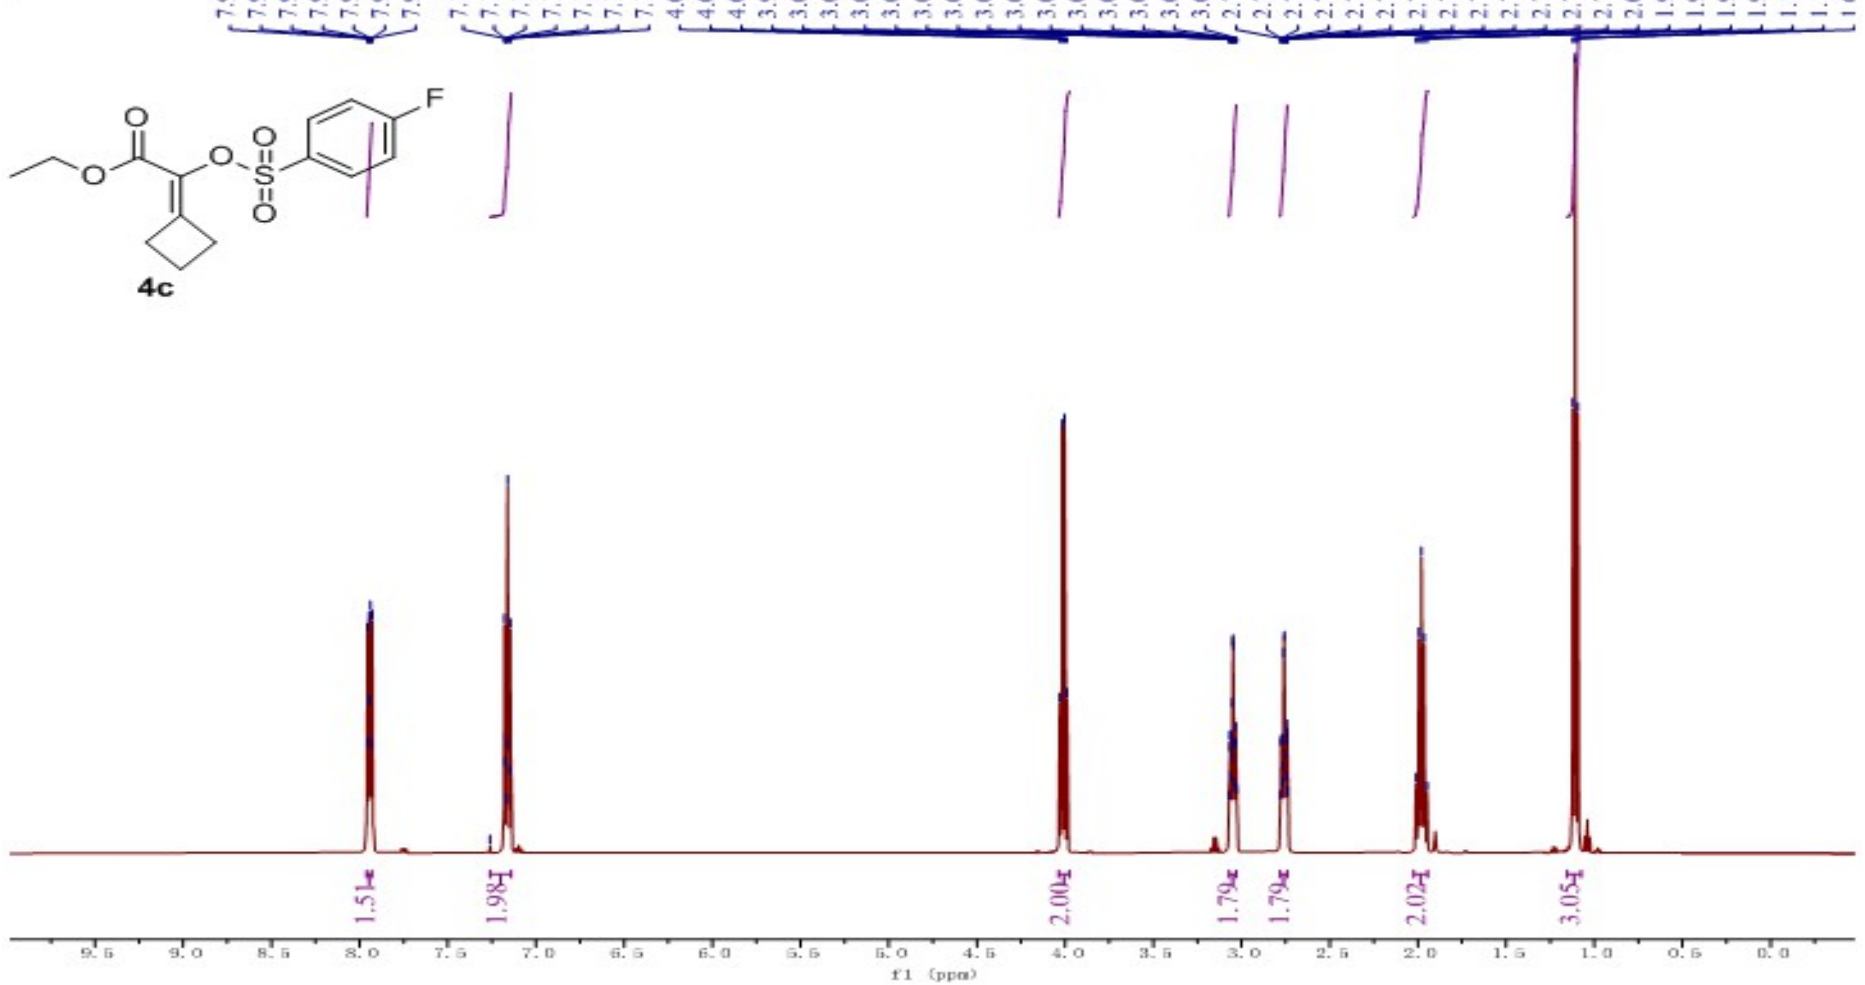

Jun18-2022\_21.fid

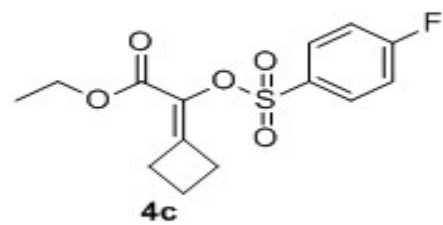

166.67  
164.63  
161.24  
156.36  
132.39  
132.37  
131.07  
130.99  
129.45  
116.15  
115.97

77.25  
77.00  
76.74  
-60.77

-41.77  
31.41  
29.65

16.75  
13.76

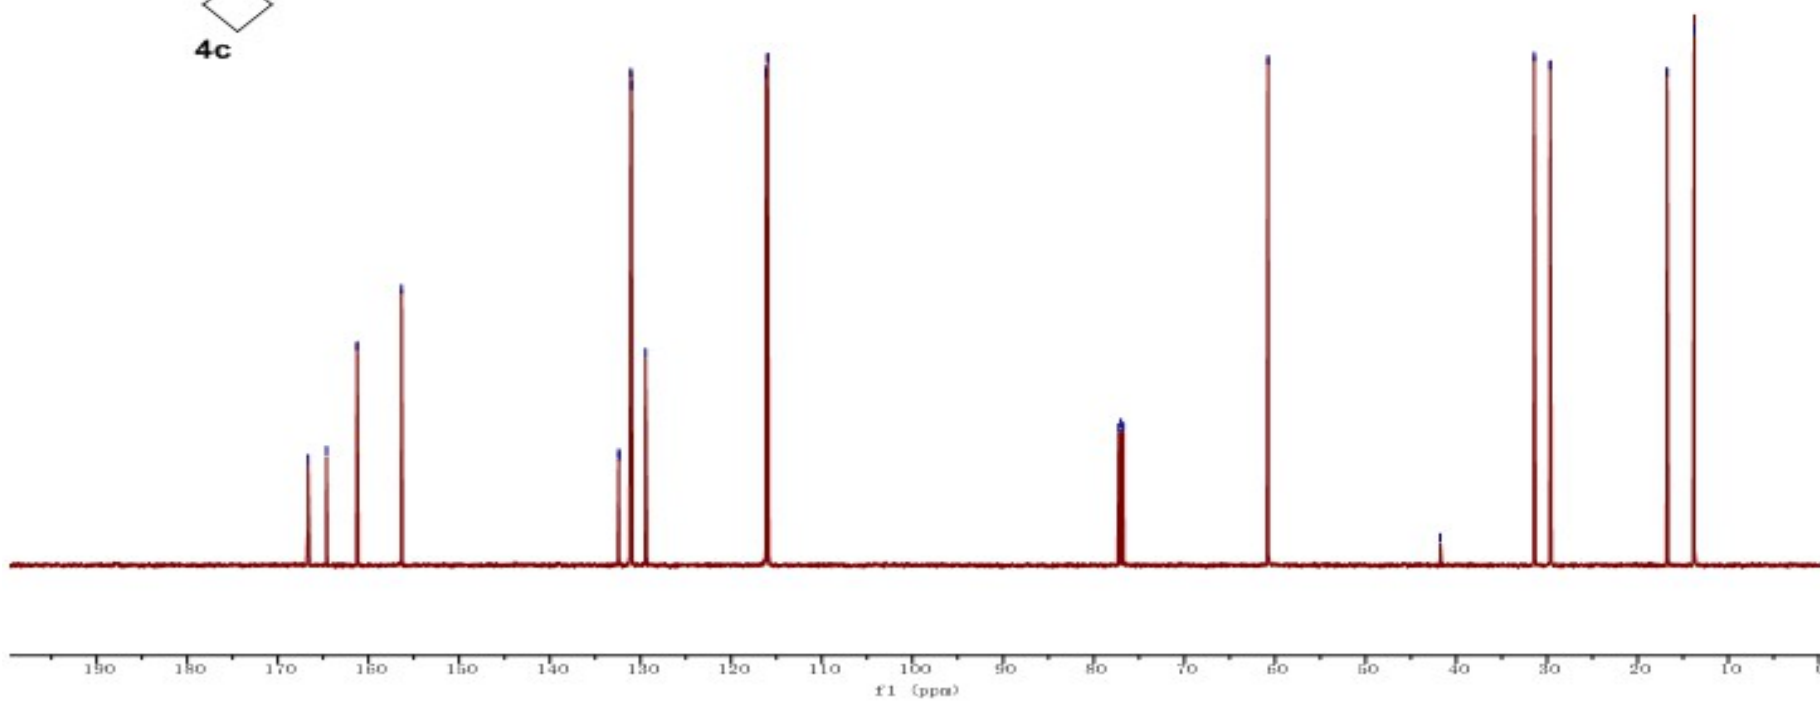

Jun18-2022, 22, f1d

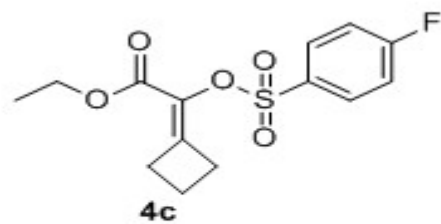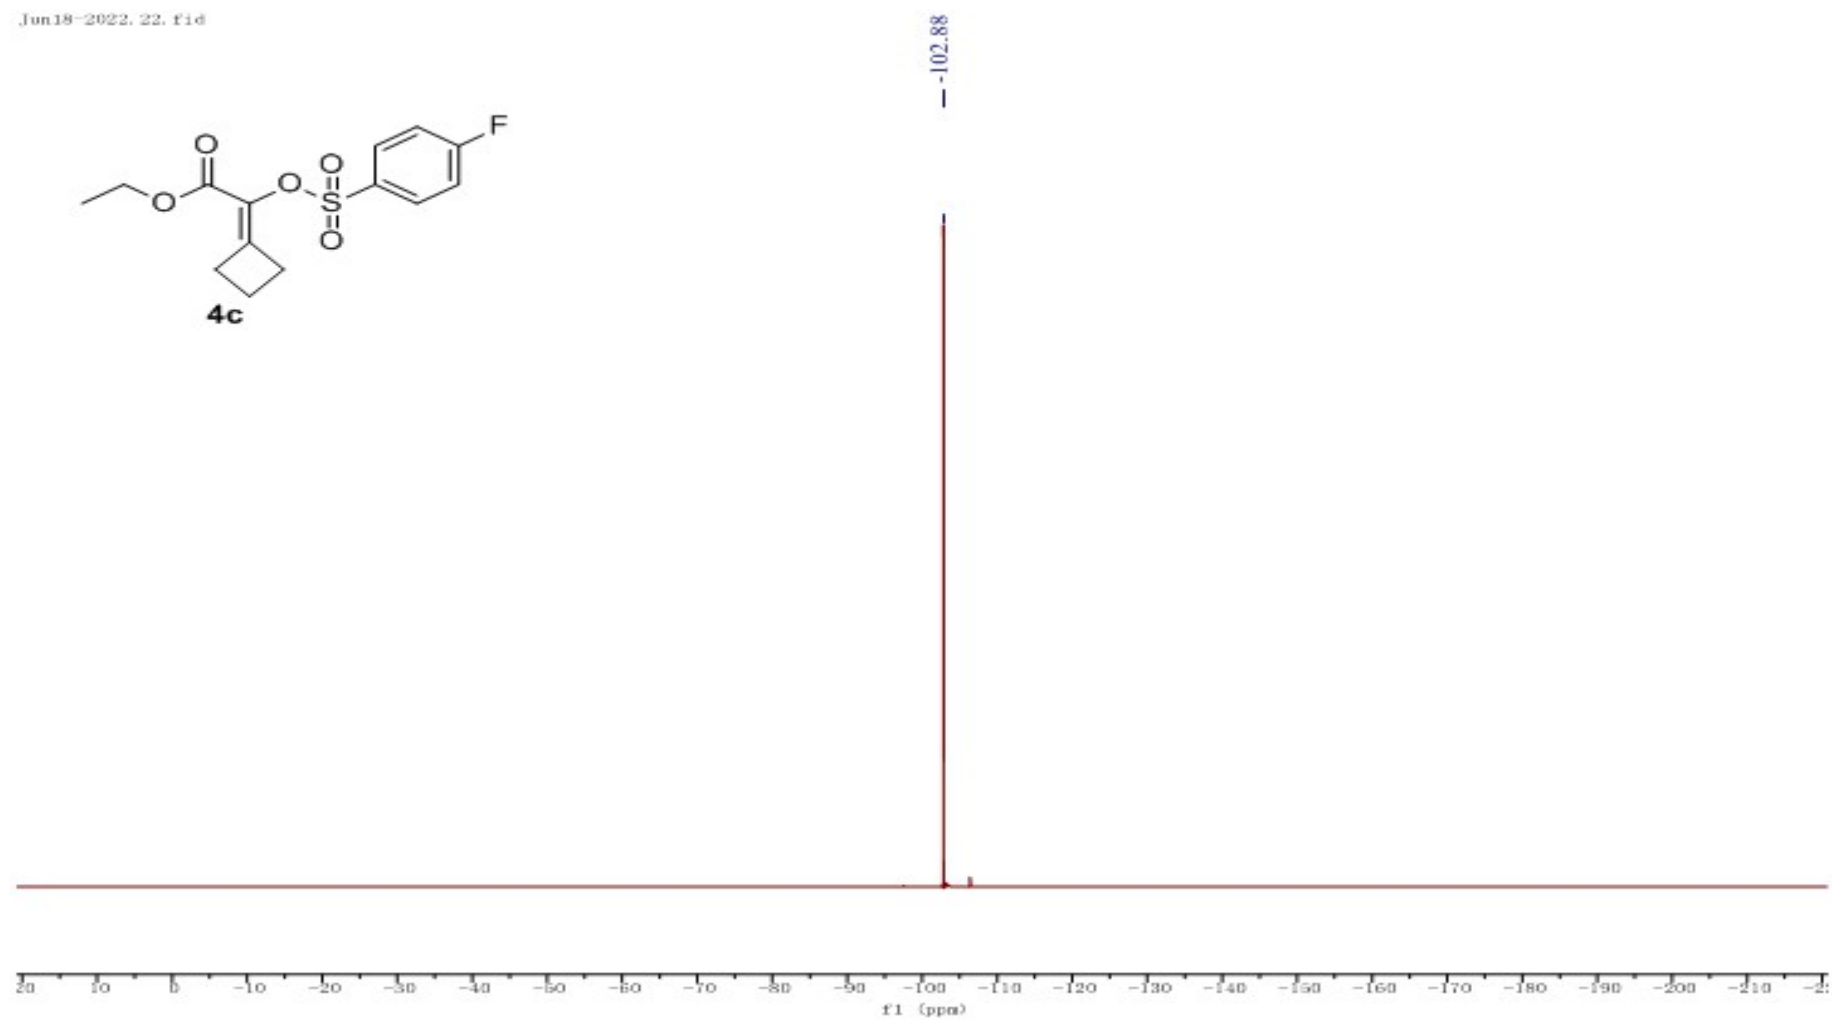



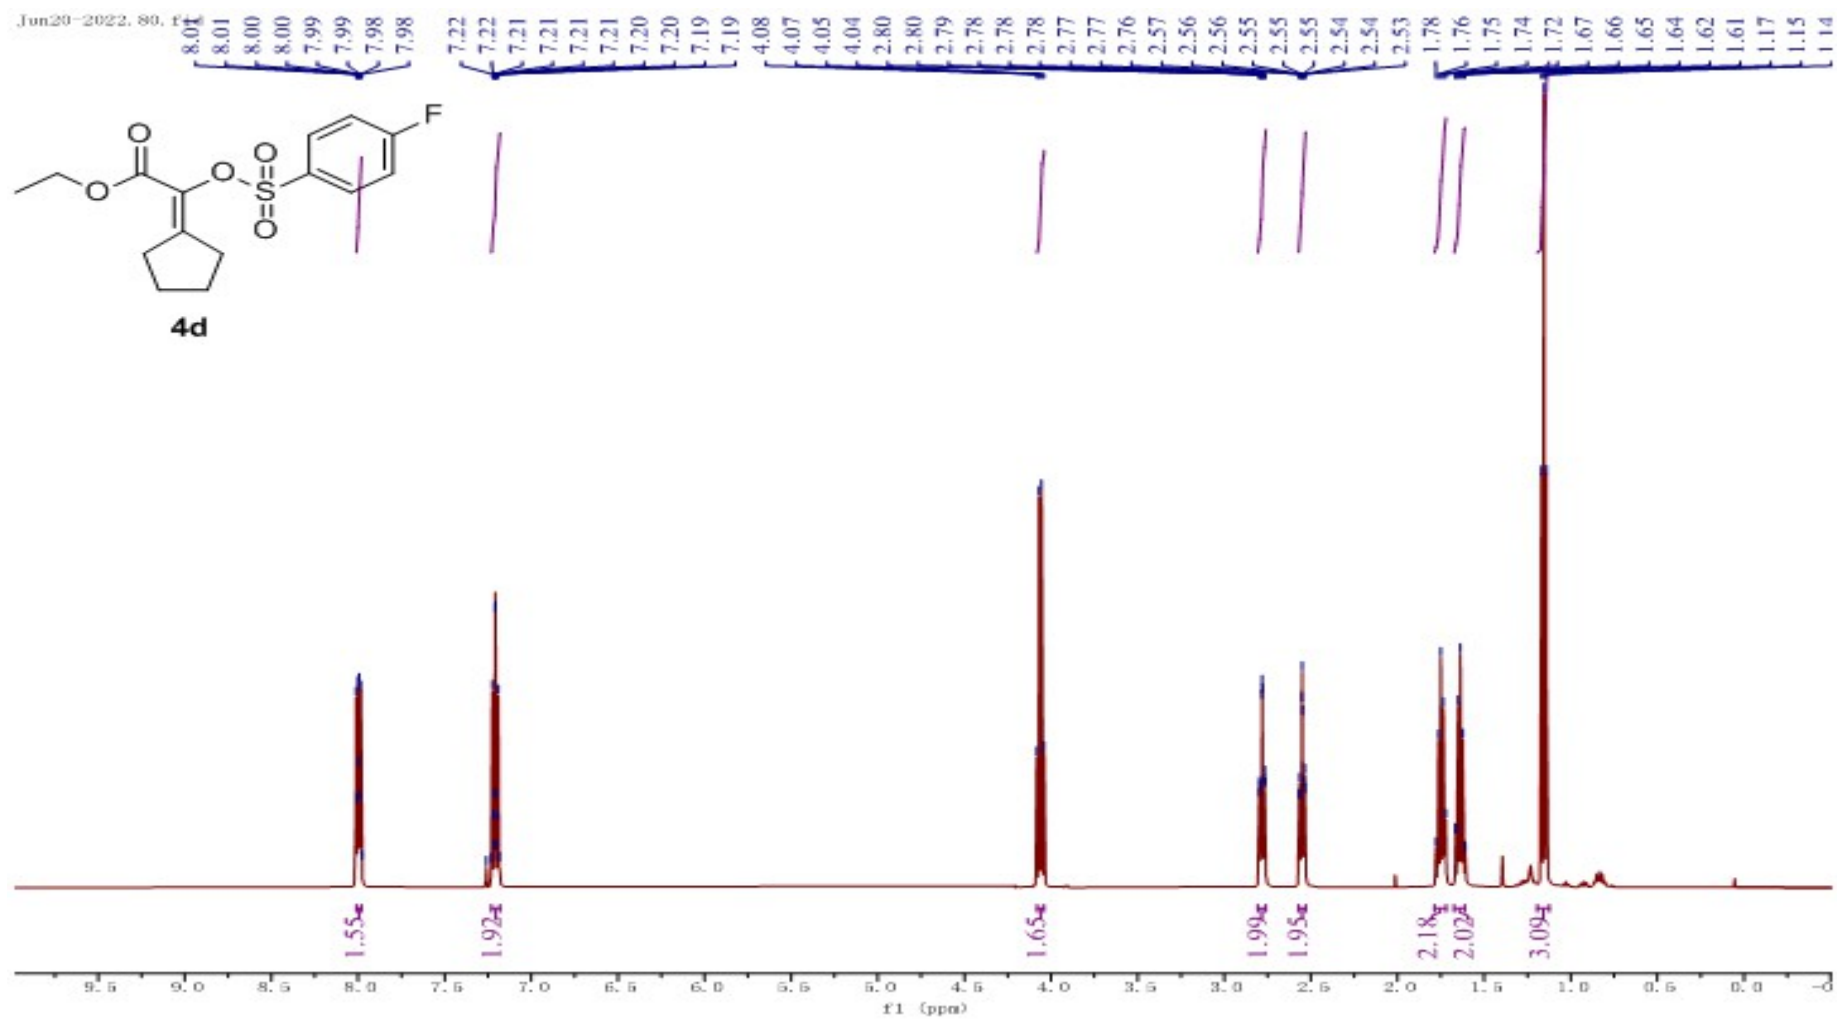

Jun20-2022\_81.f1d

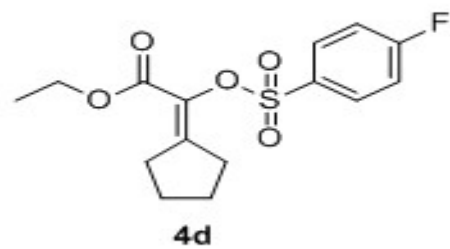

166.76  
164.72  
161.83  
158.21

133.16  
133.13  
131.06  
130.98  
130.18  
116.25  
116.07

77.26  
77.00  
76.75

-60.97

33.36  
32.65  
26.64  
25.35  
-13.94

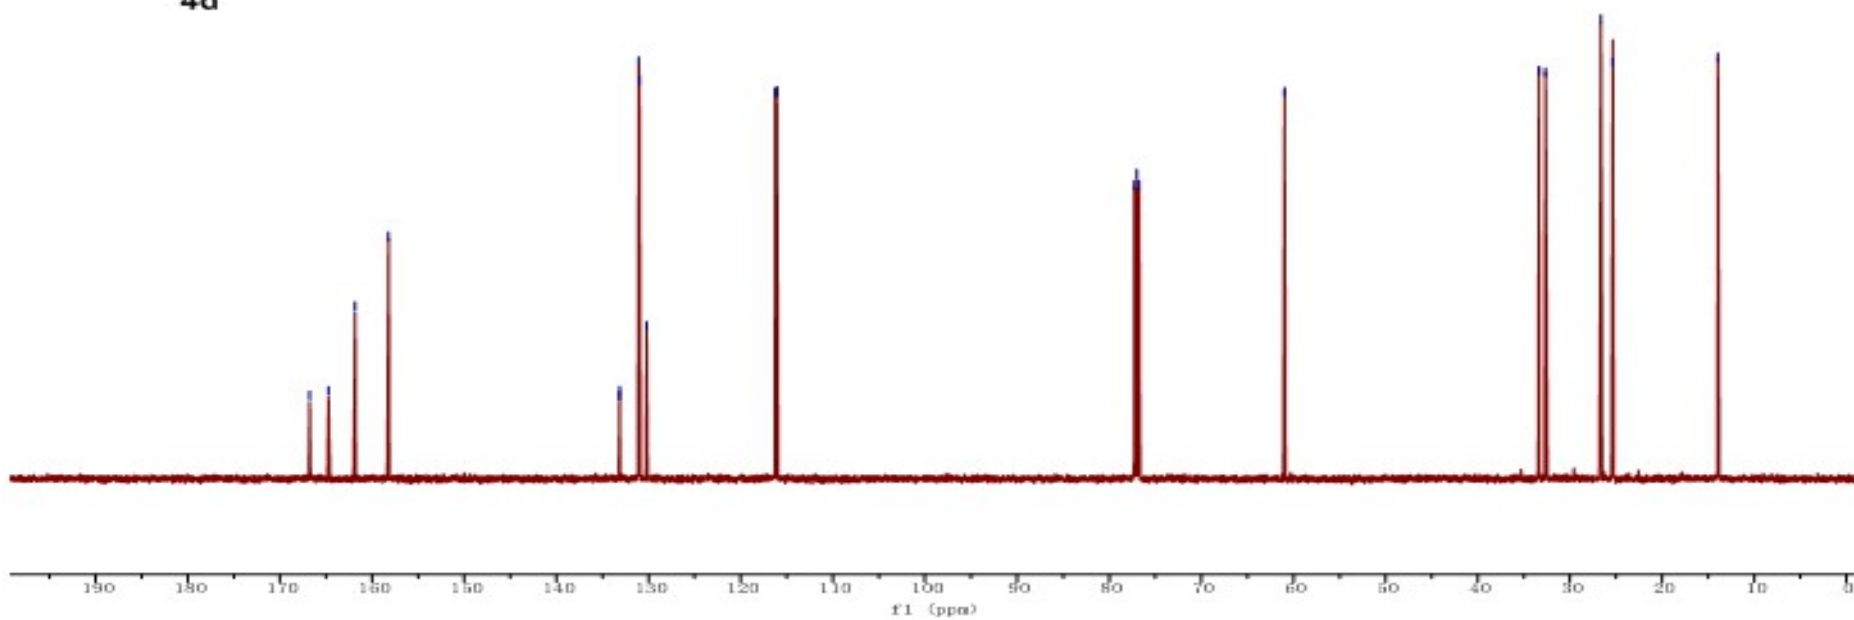

Jun20-2022, 82, f1d

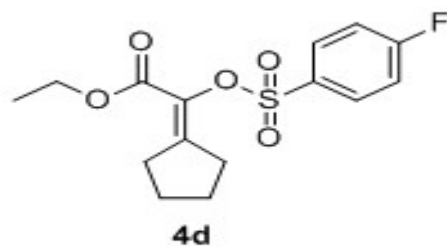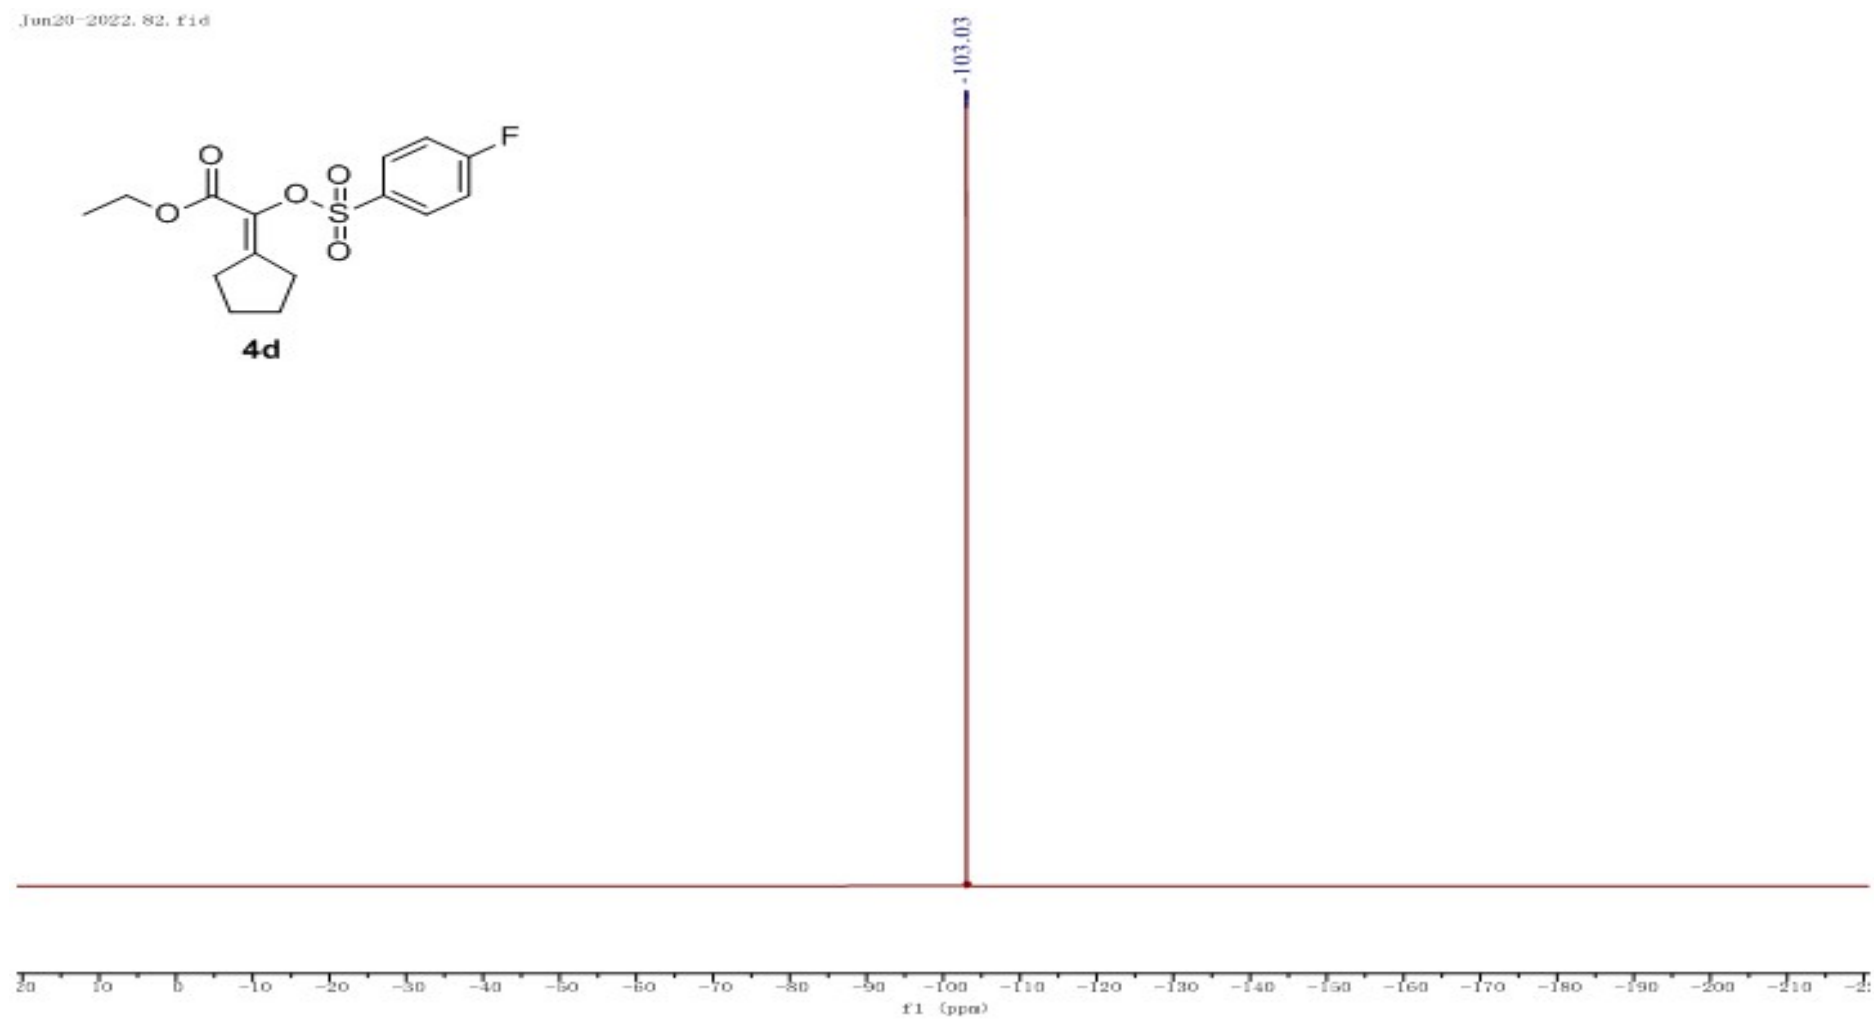

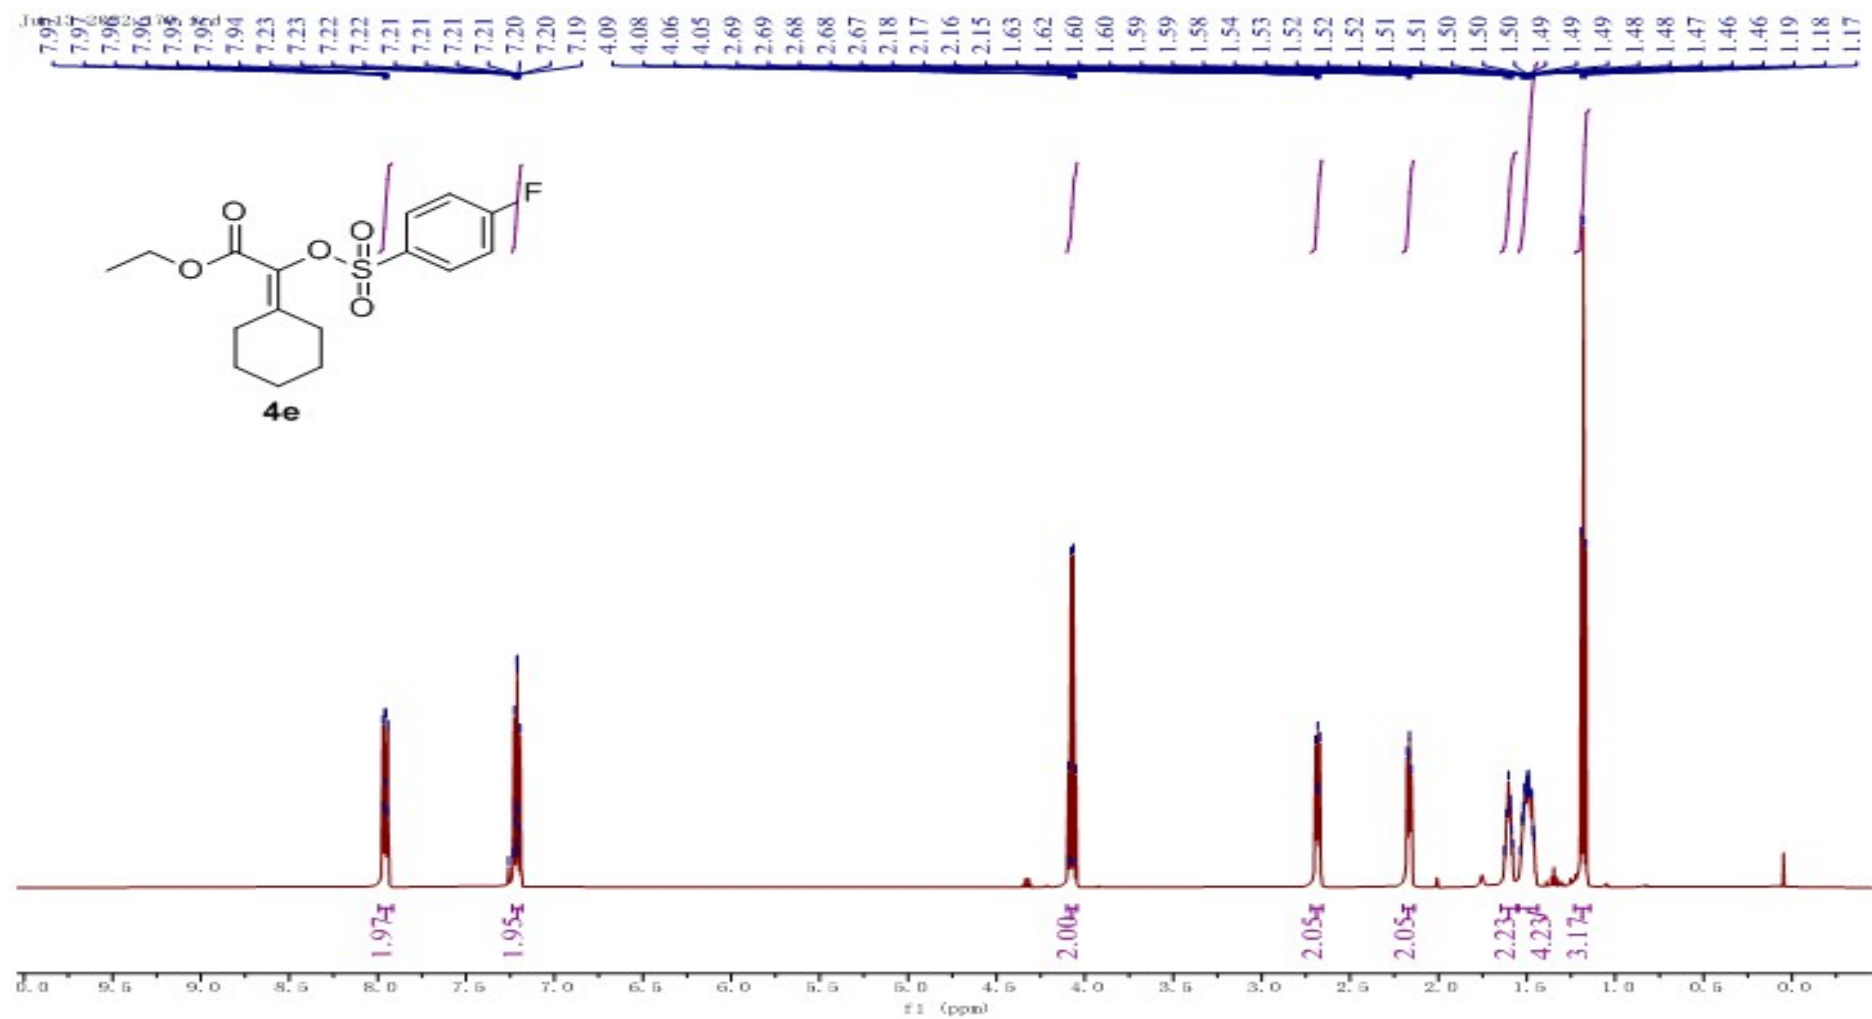

Jun13-2022, 171, f1.d

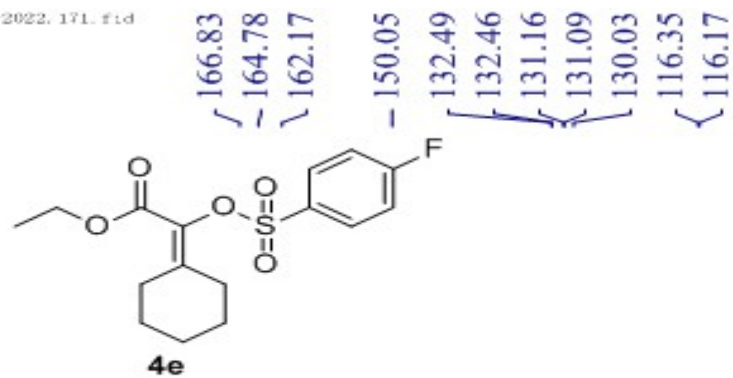

77.26  
77.00  
76.75

-61.09

30.02  
29.47  
27.51  
27.14  
25.70  
13.82

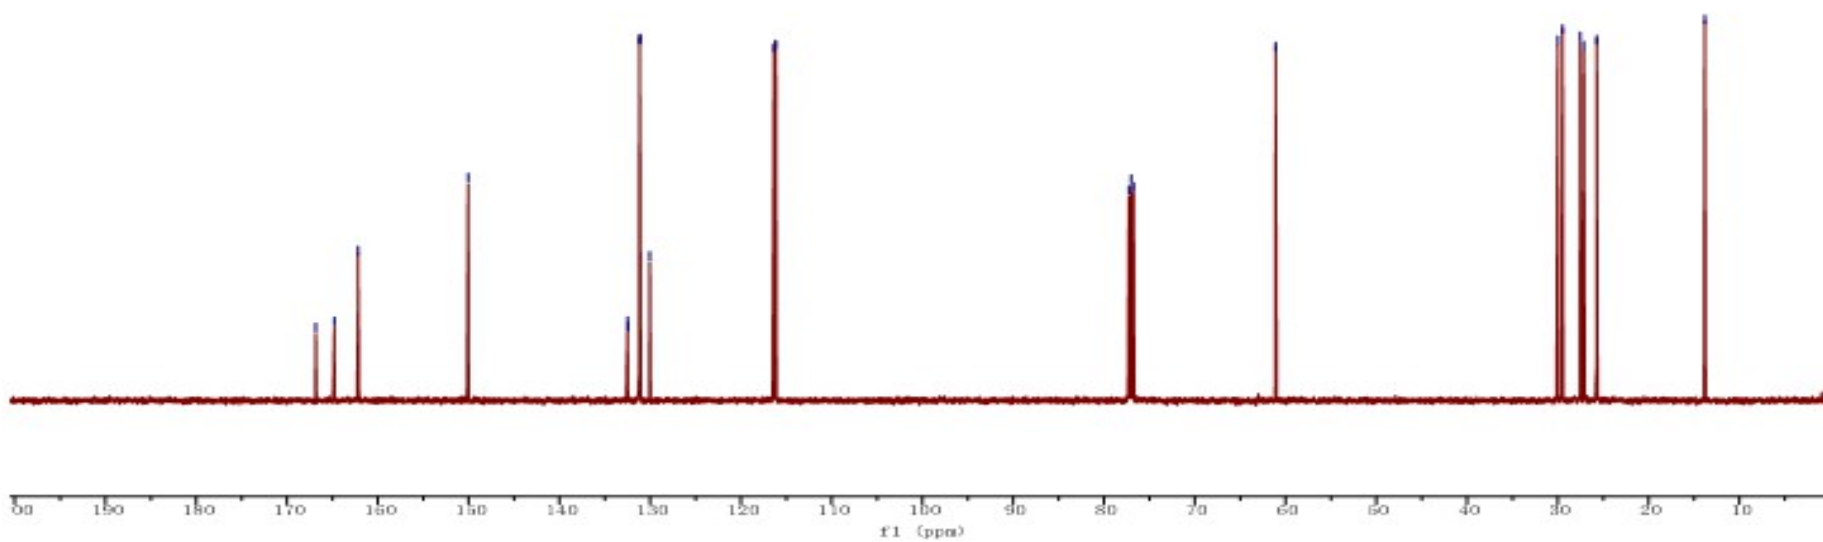

Jun13-2022, 172, f1.d

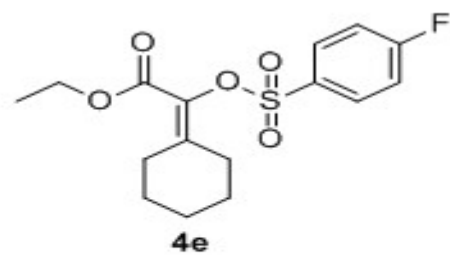

-102.71

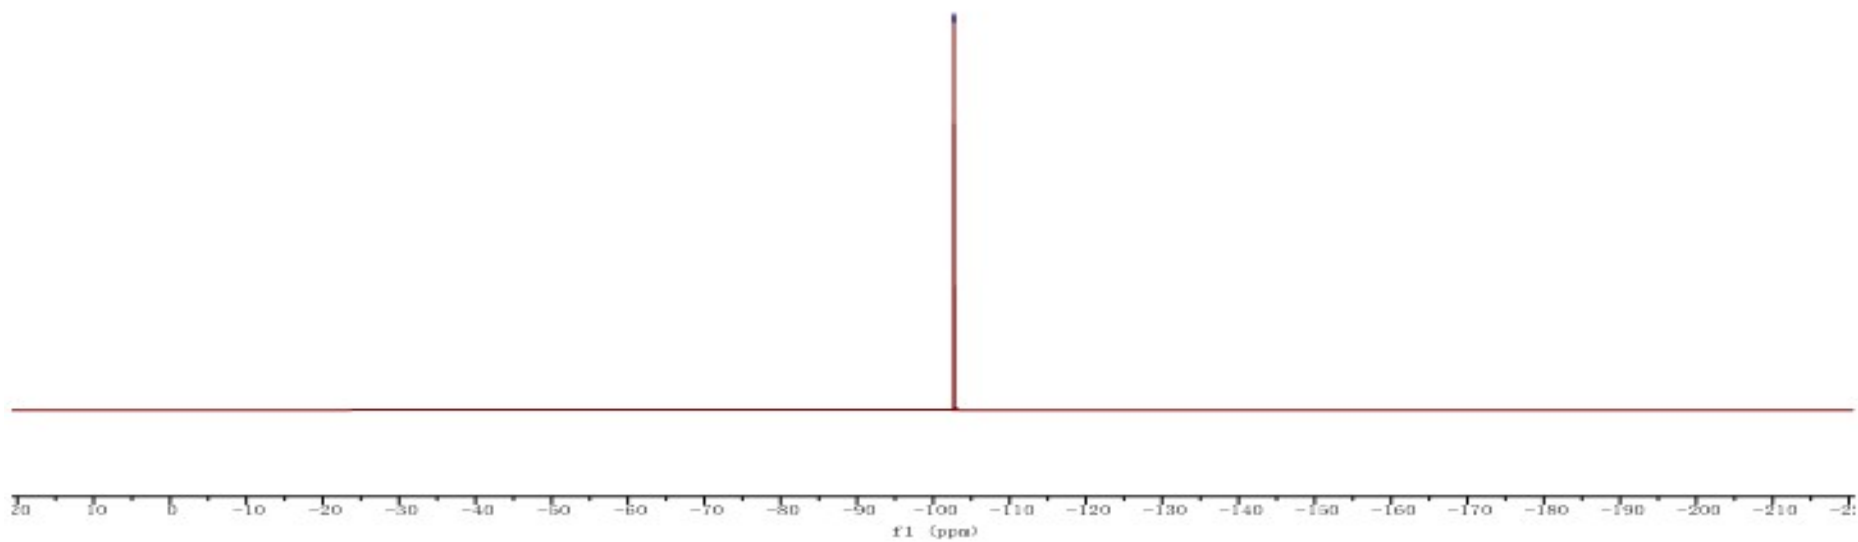

Jun07-2022, 170, f1.d

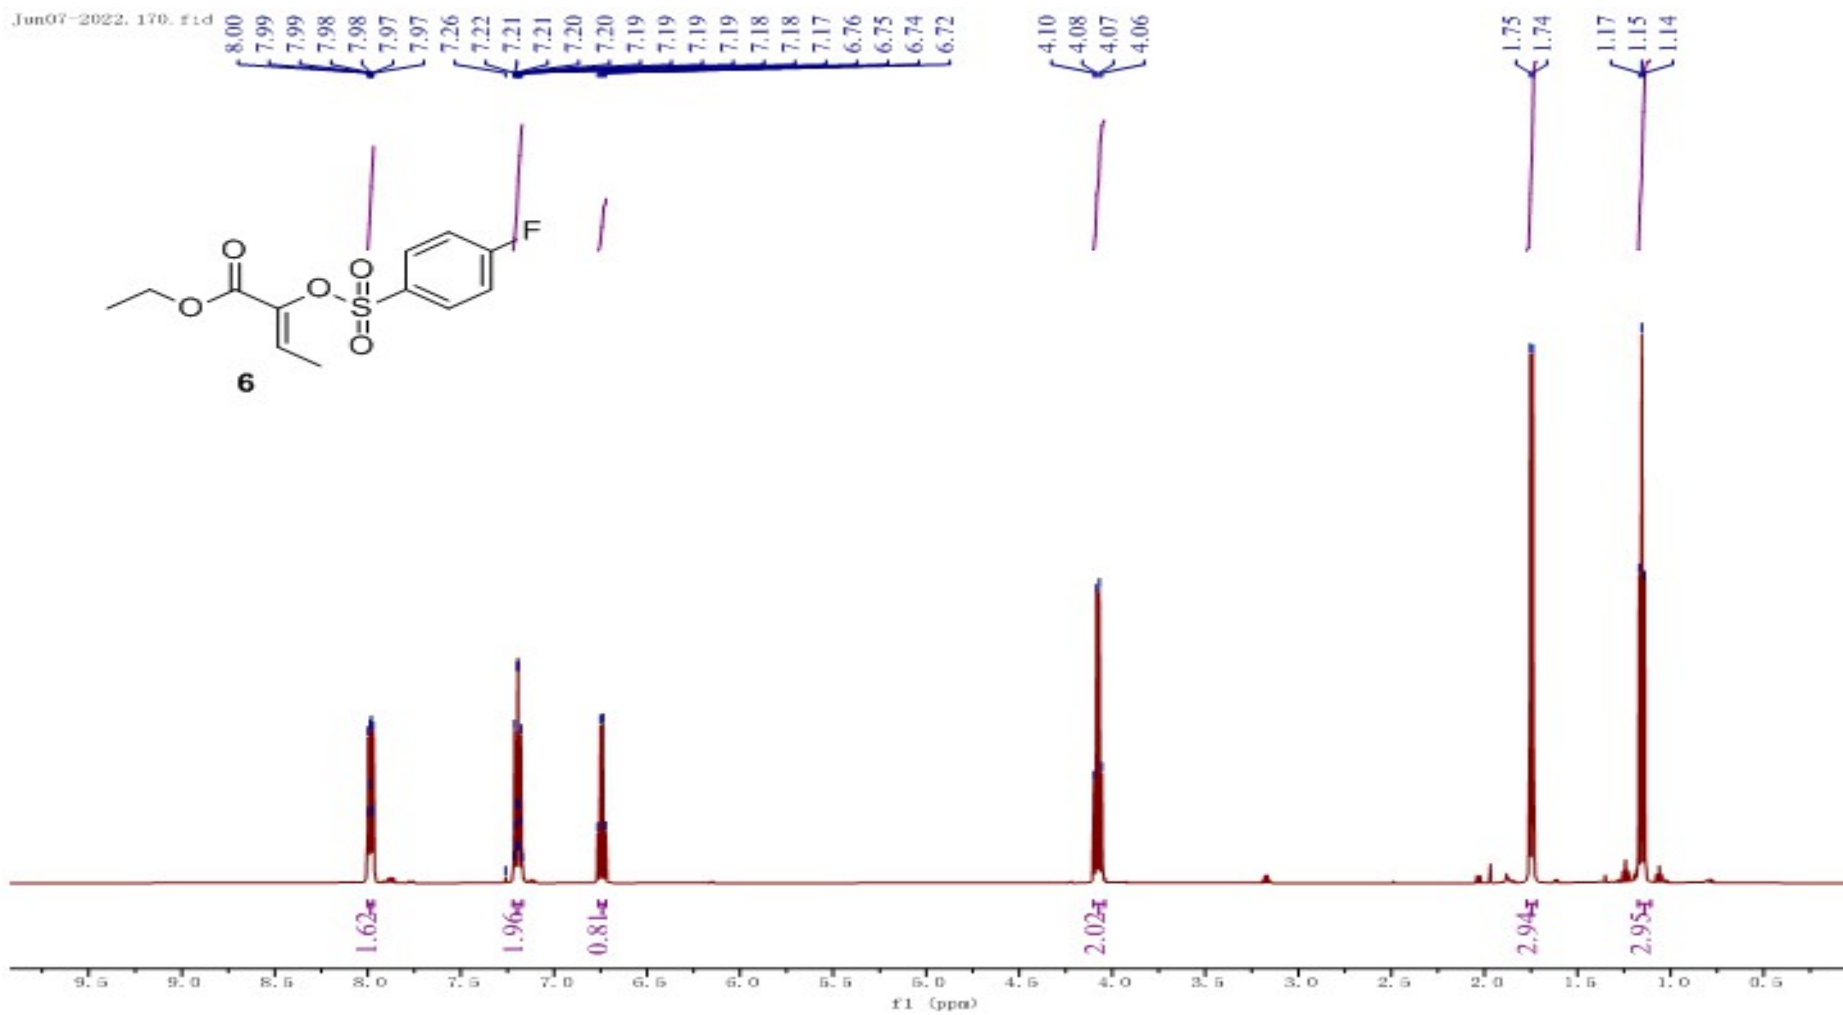

Jun07-2022\_171.fid

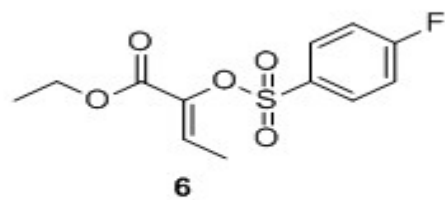

166.83  
164.78  
161.21

138.01  
132.42  
132.40  
131.64  
131.15  
131.07

116.29  
116.11

77.25  
77.00  
76.74

61.44

13.75  
12.16

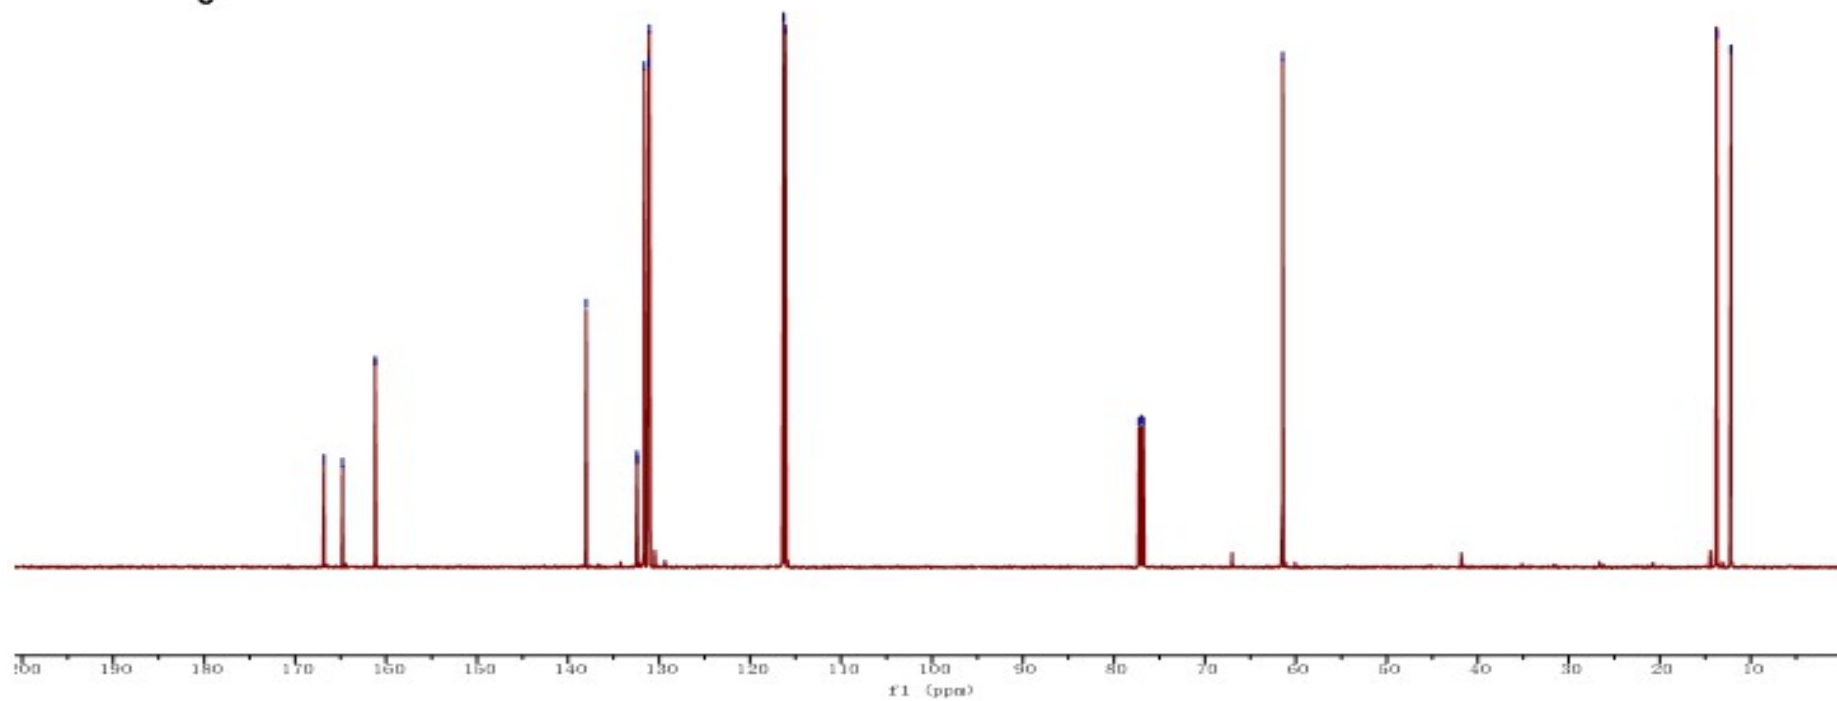



Jun07-2022, 172, f1.d

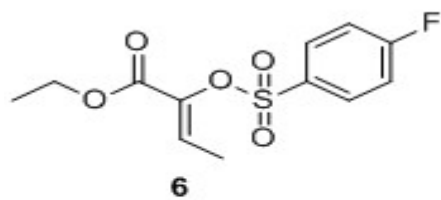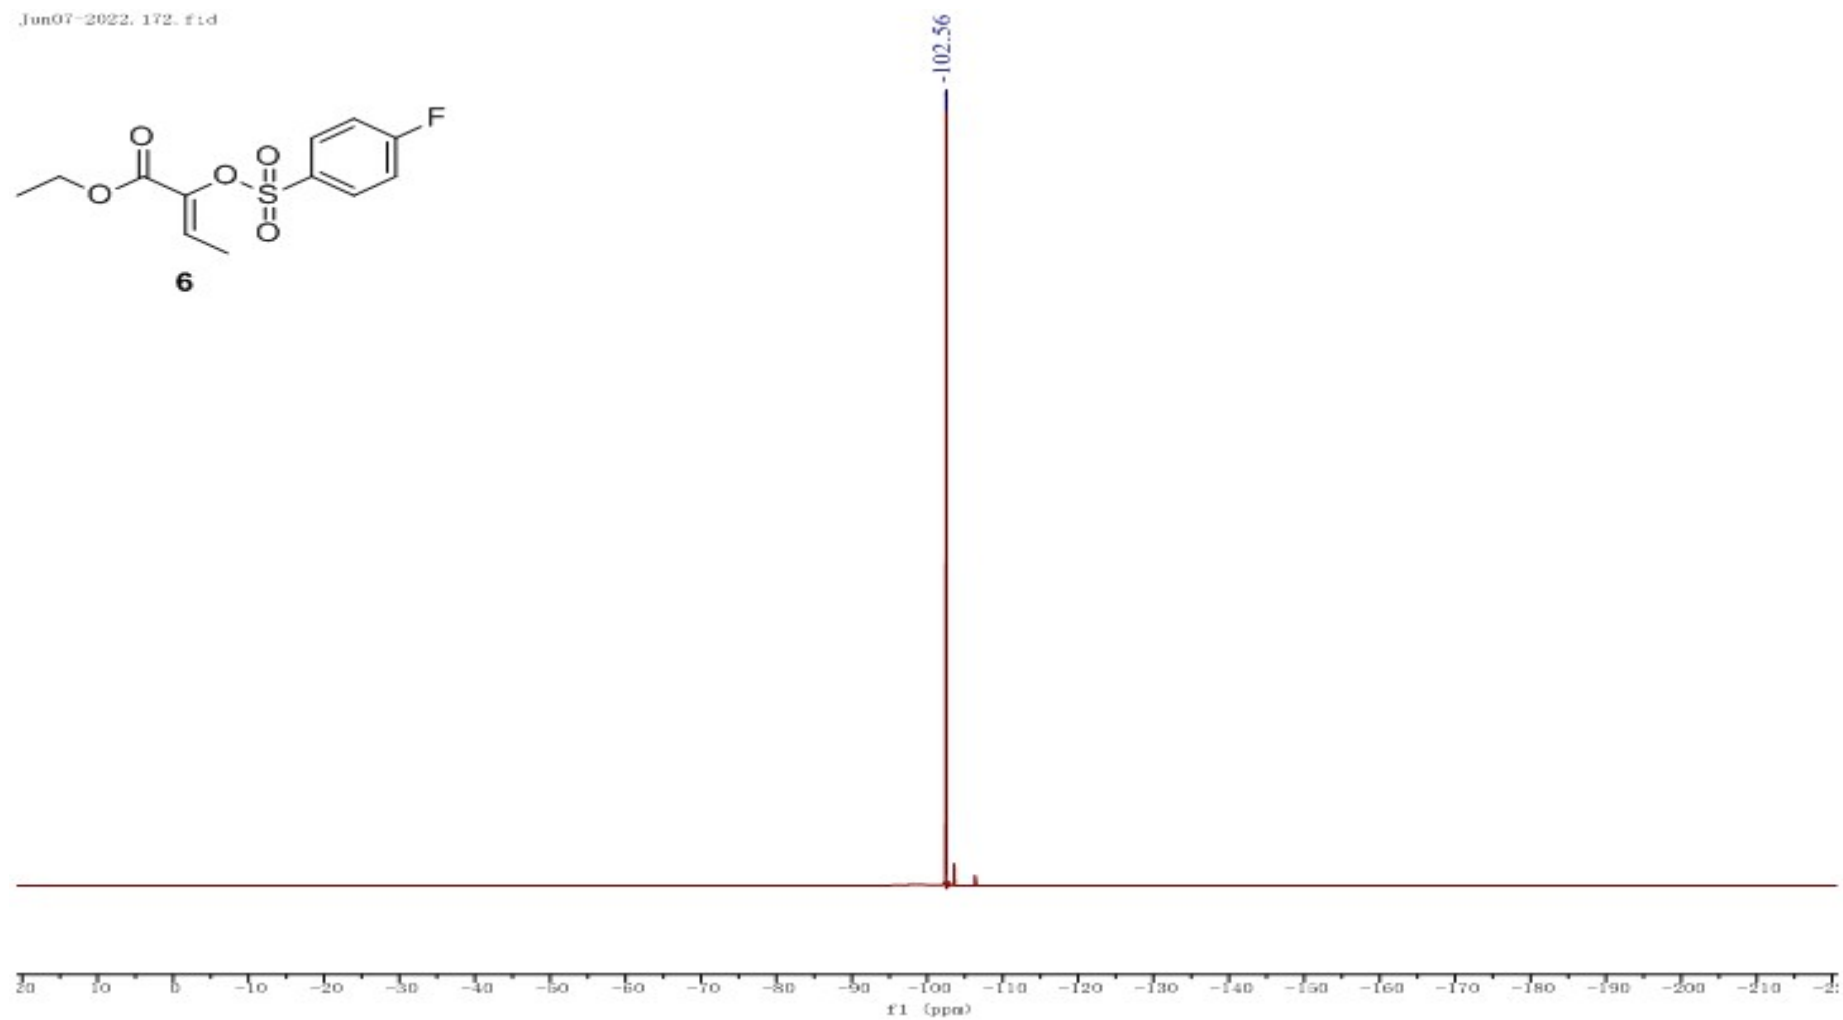

Apr23-2022, 60, f1d

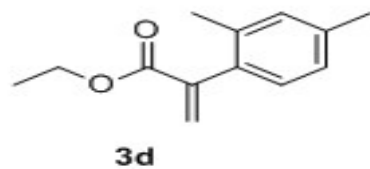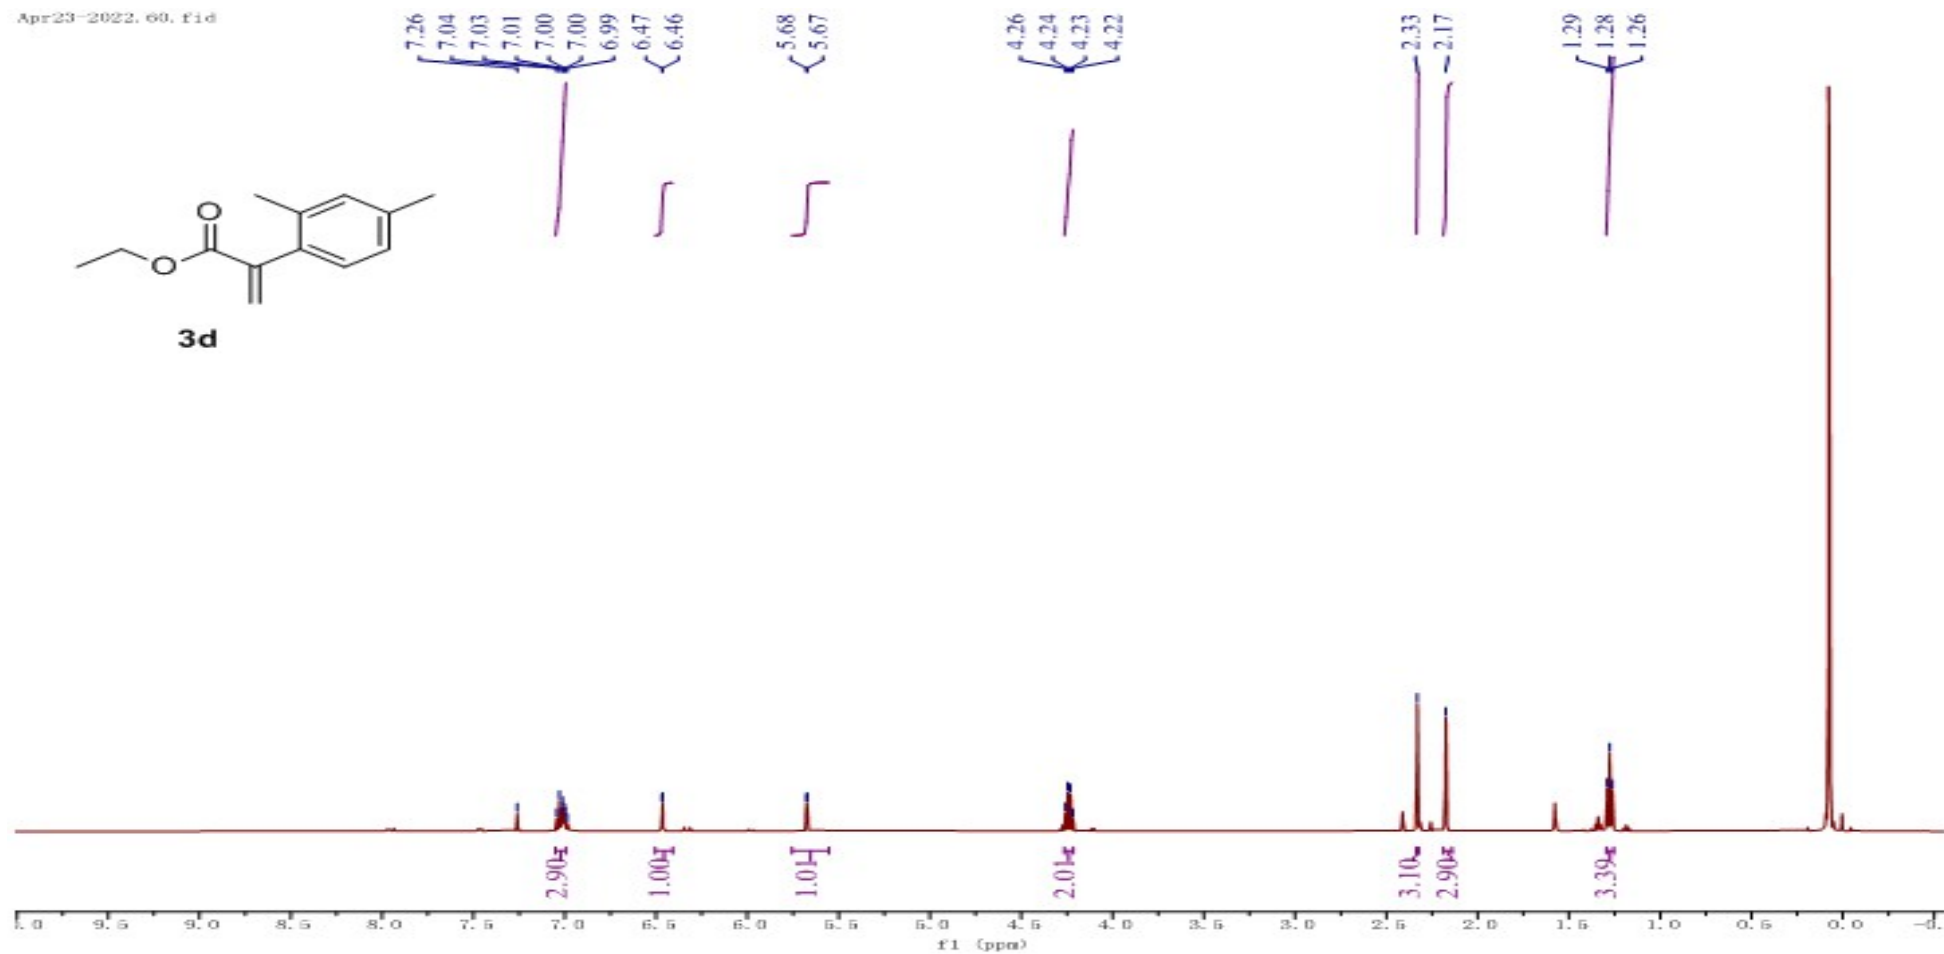

Apr23-2022, 61, f1d

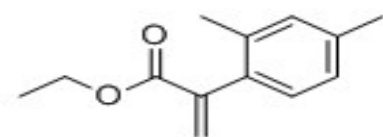

**3d**

166.83

142.03  
137.79  
135.86  
134.45  
130.67  
129.44  
128.03  
126.30

77.25  
77.00  
76.75

60.99

21.10  
19.75  
14.18

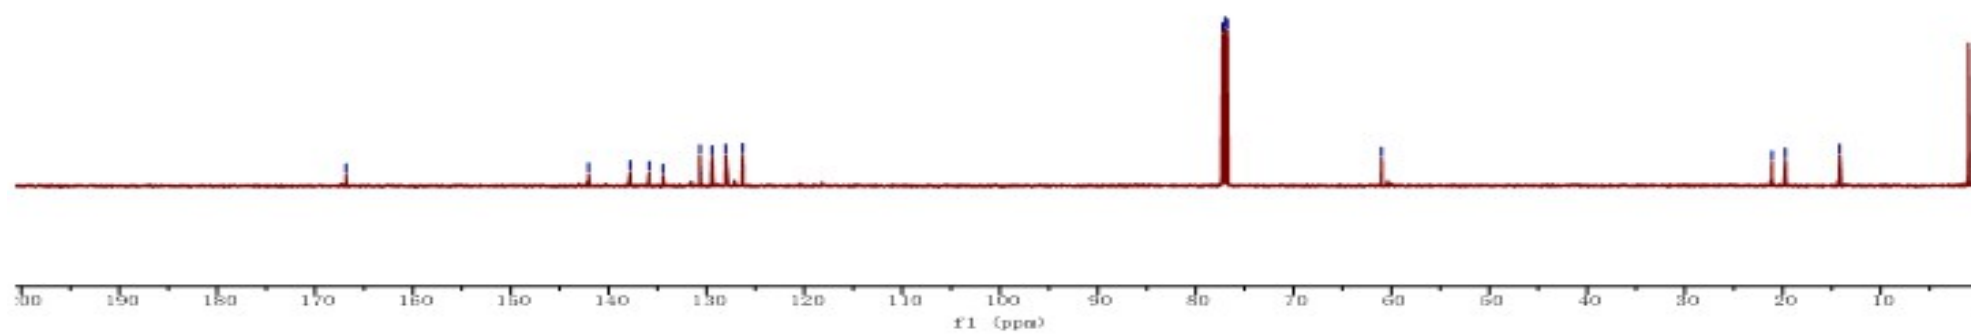

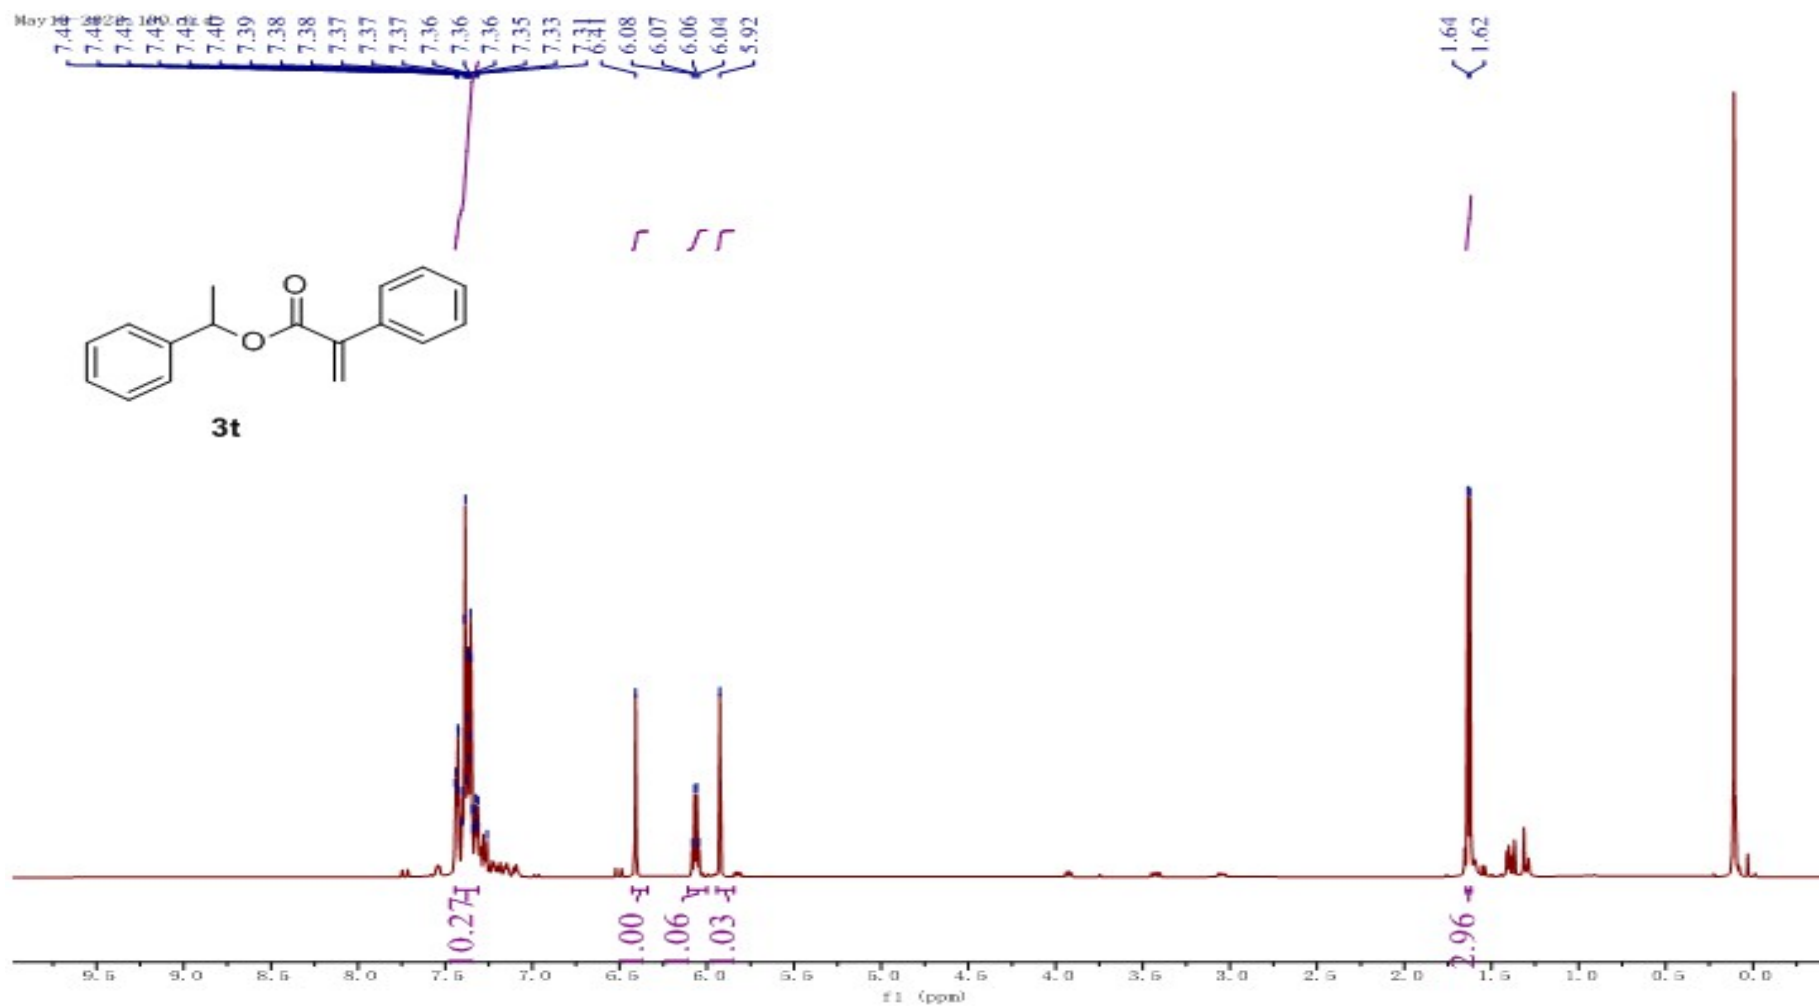

May19-2022\_131.fid

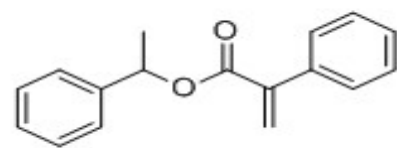

**3t**

165.94

141.58  
141.56  
136.67  
128.50  
128.48  
128.29  
128.27  
128.08  
128.01  
127.85  
126.59  
126.03

77.25  
77.00  
76.74  
73.13

22.34

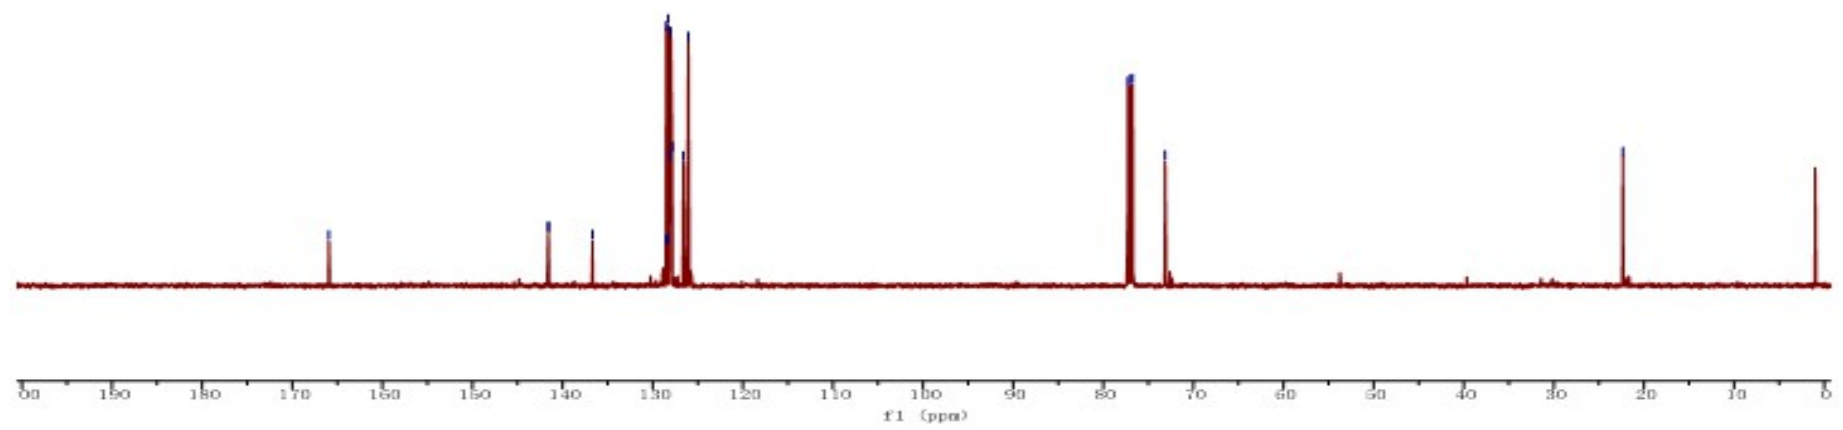

Jun15-2022, 340, f1.d

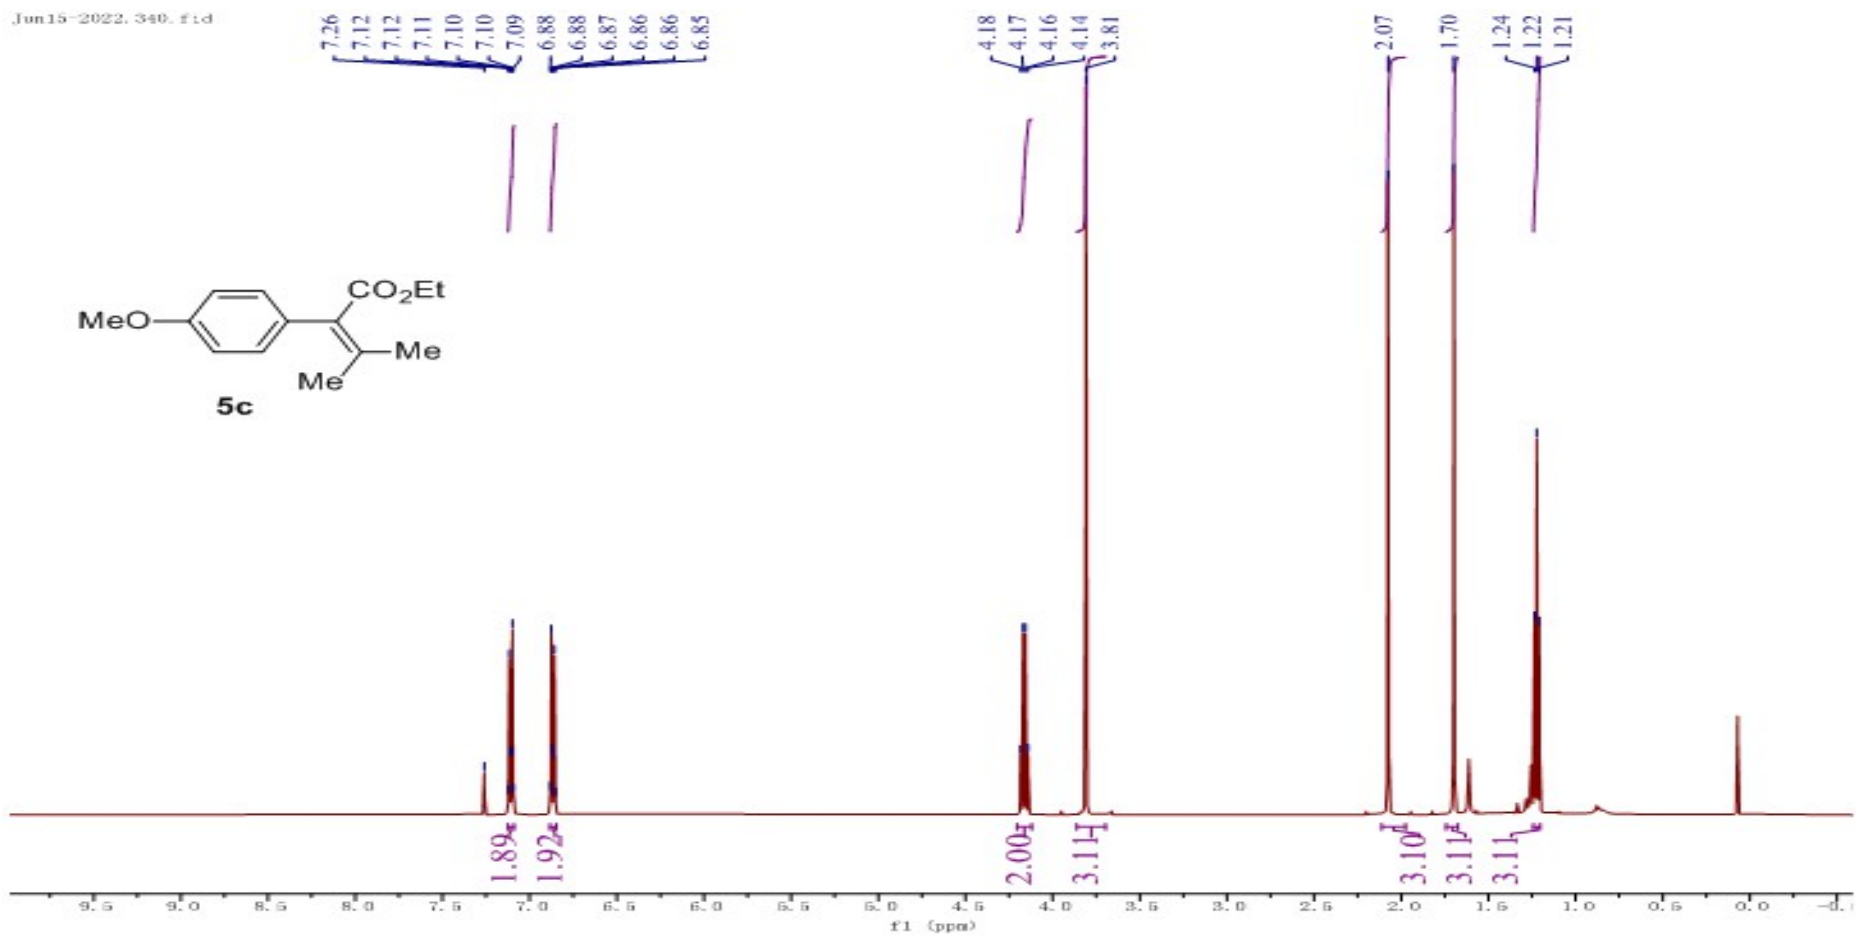

Jun15-2022\_341.f1d

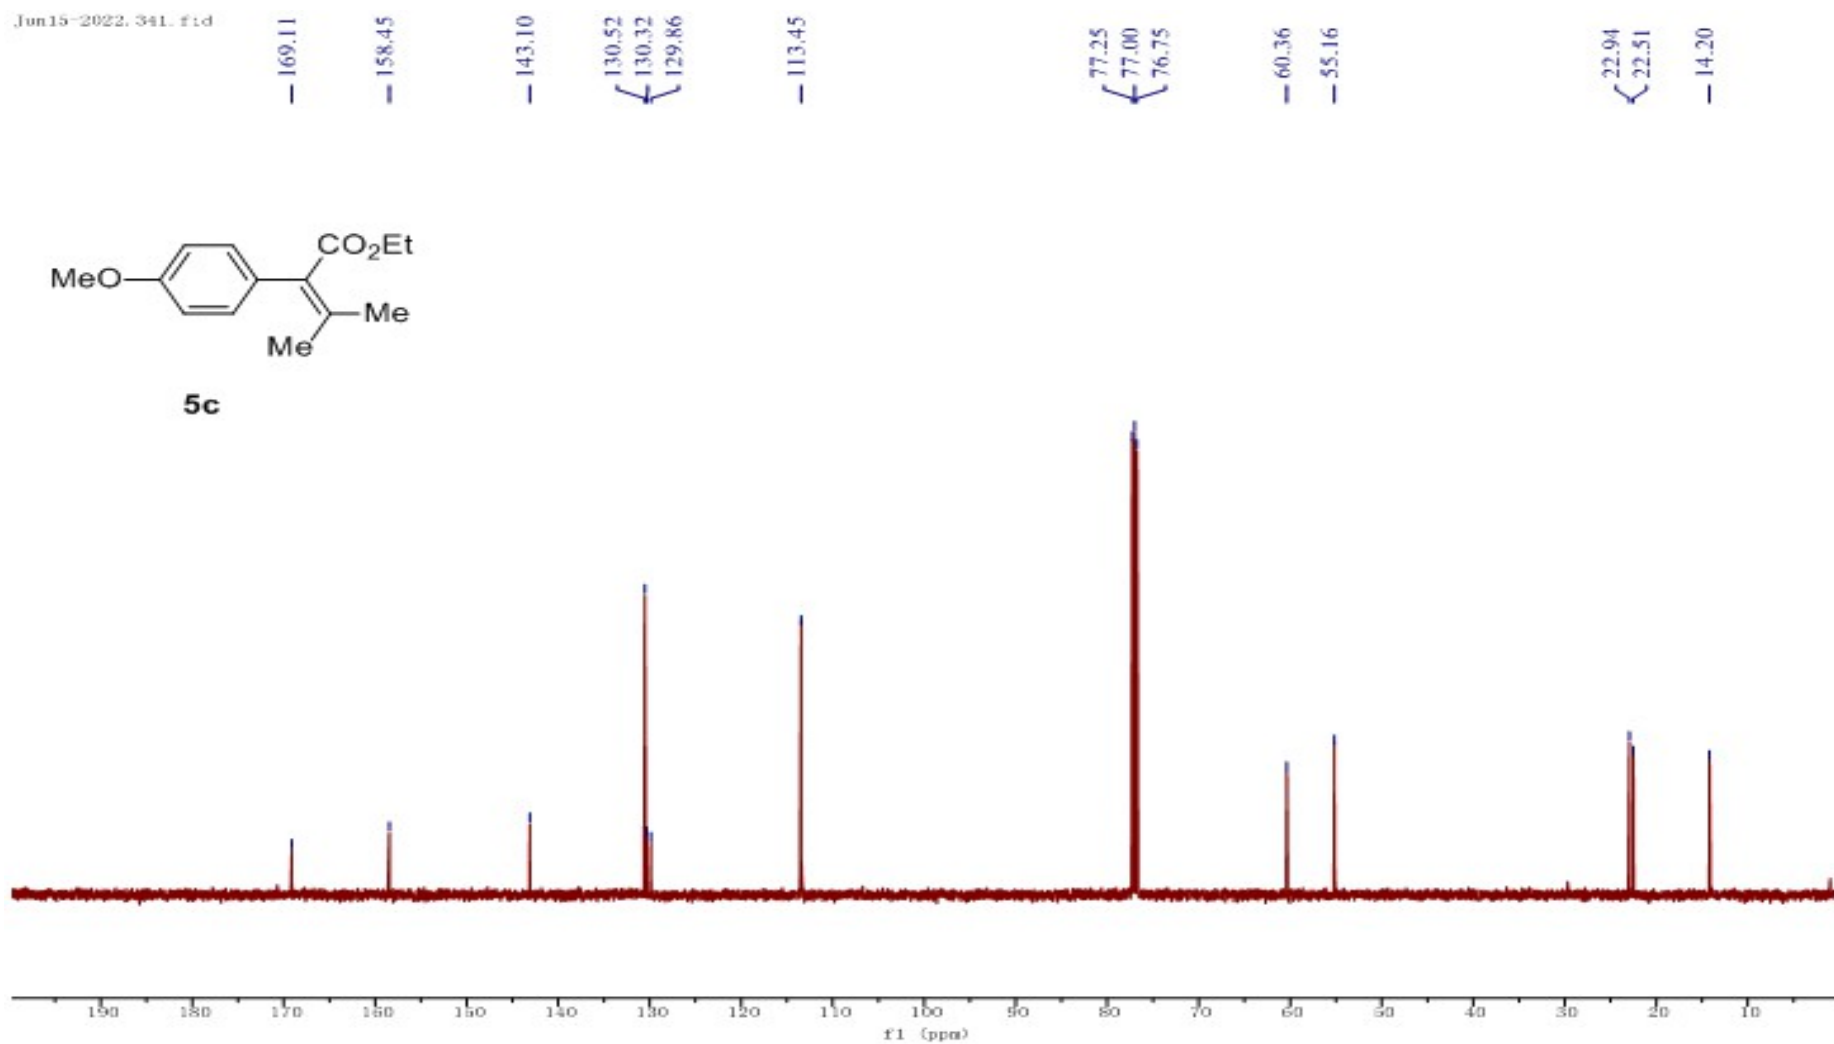

Jun18-2022, 280, f1.d

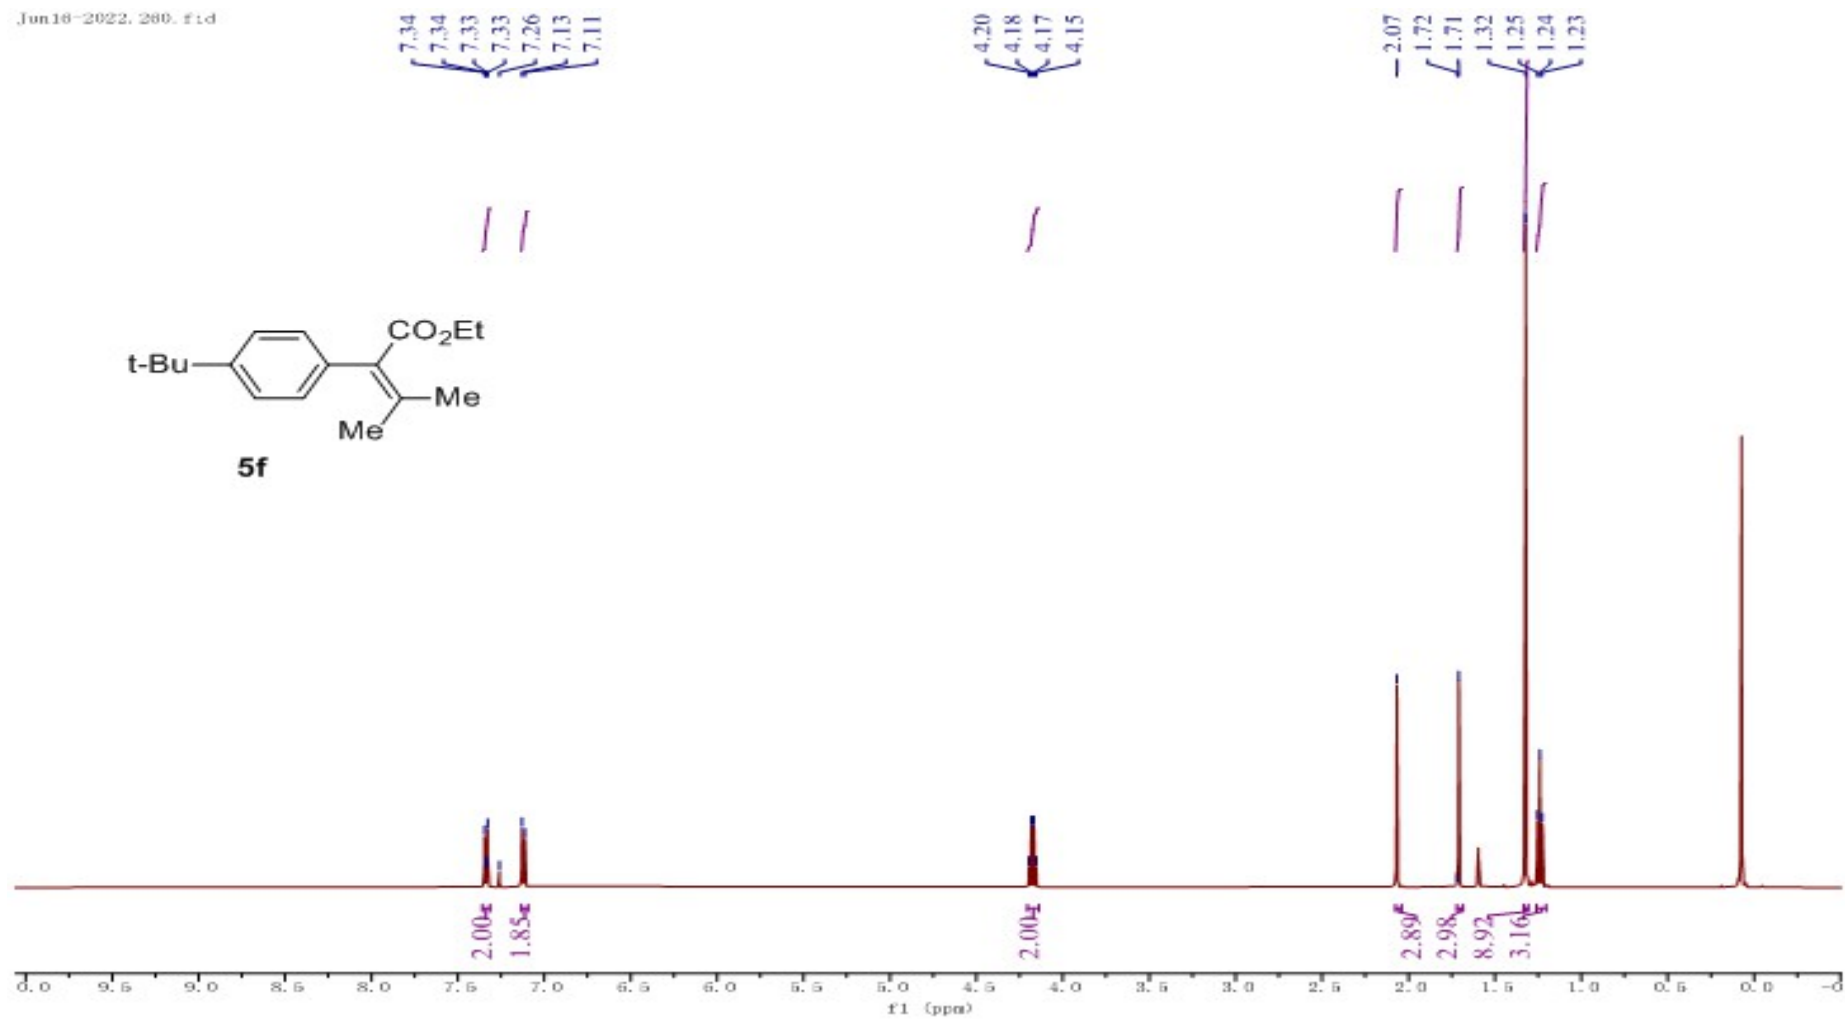



Jun18-2022, 281, f1.d

169.22 149.67 142.47 134.77 130.32 128.98 124.92 77.25 77.00 76.75 60.40 34.47 31.33 22.87 22.55 14.21

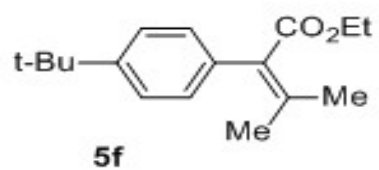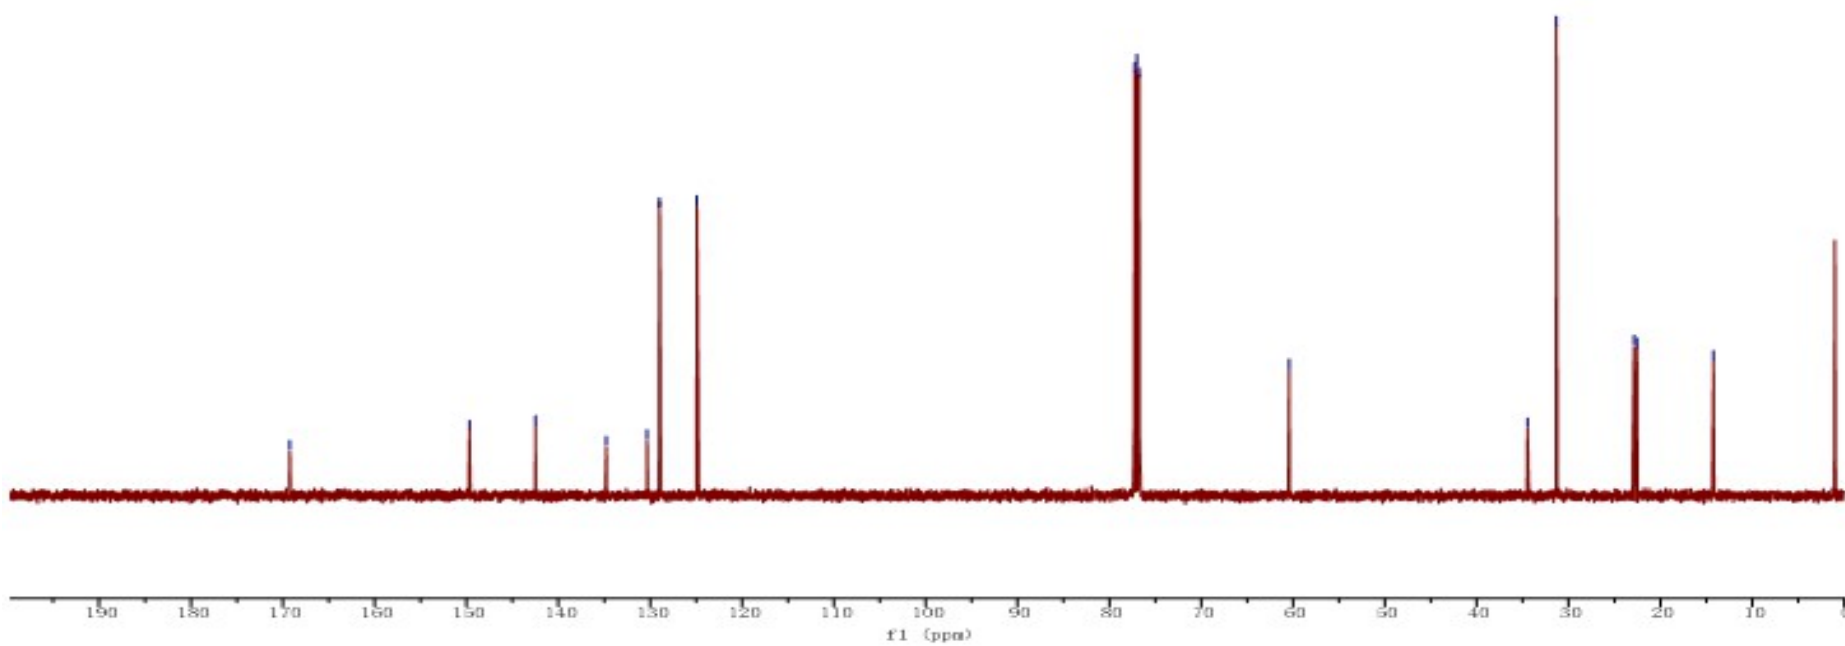

Jun23-2022\_330.f1.d

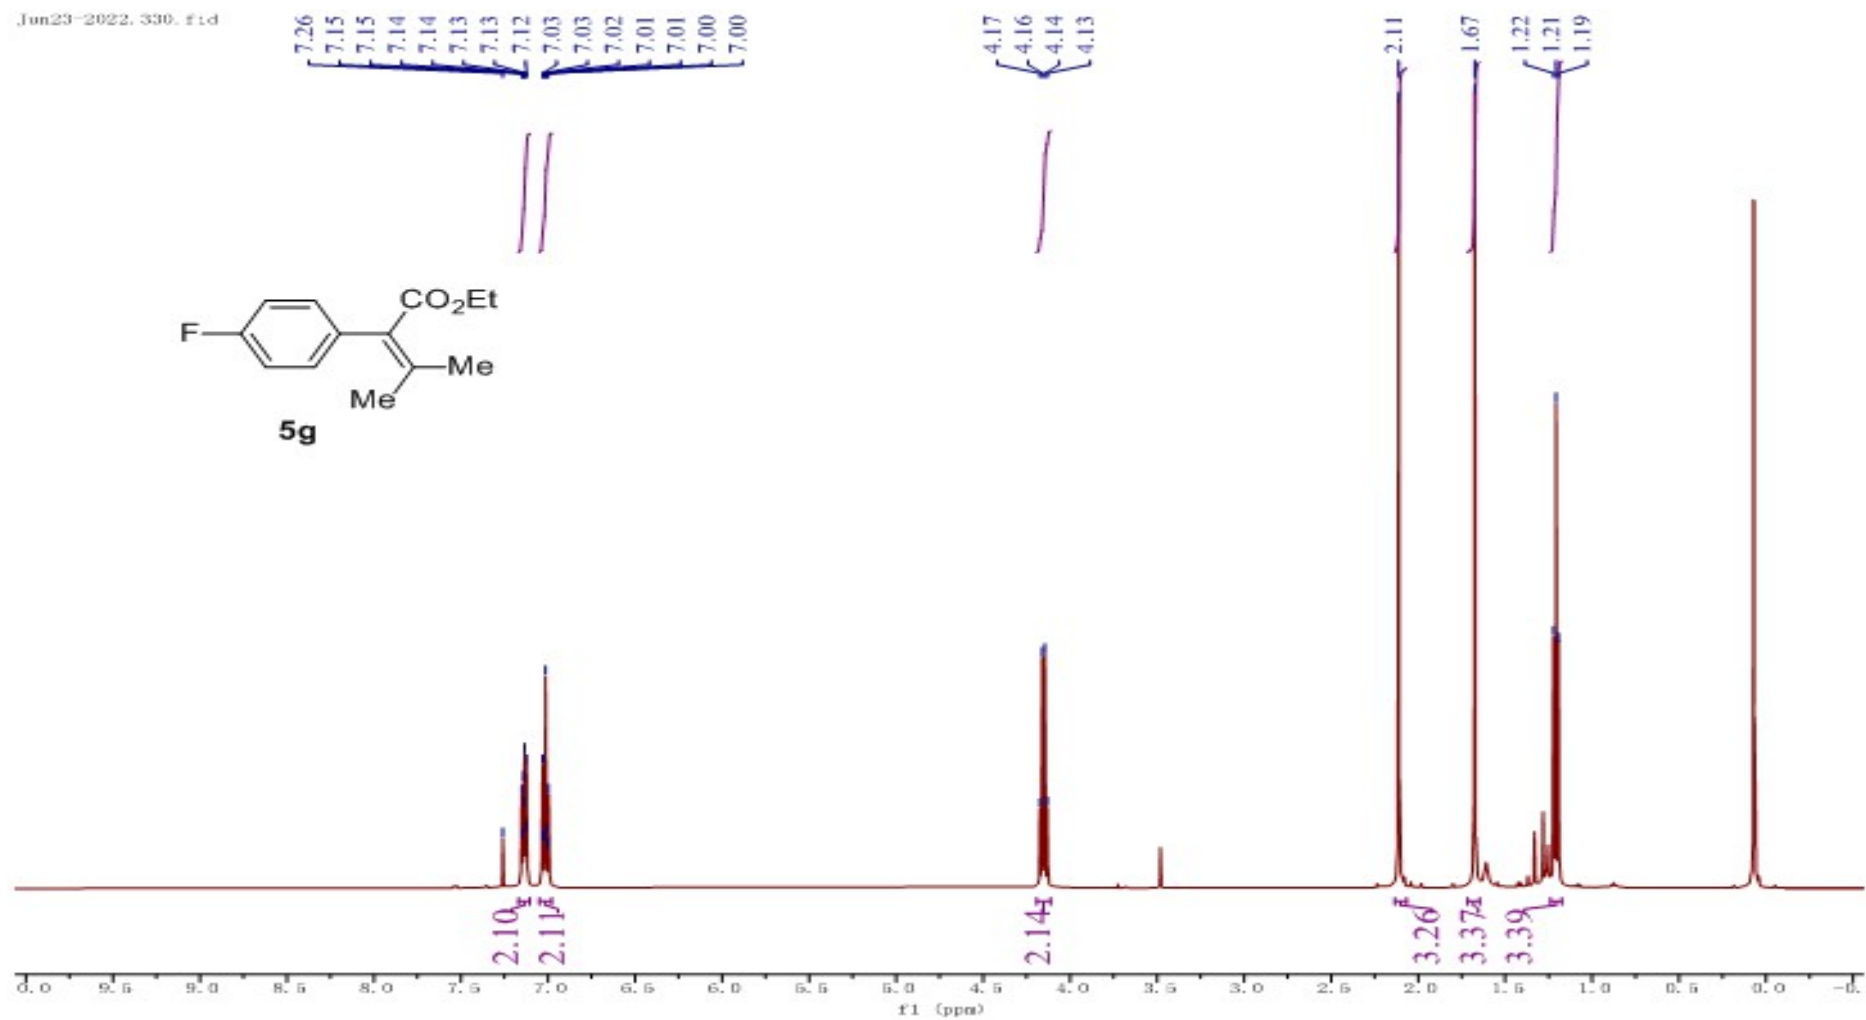

Jun23-2022\_331.f1d

168.49  
162.78  
160.83

144.94

134.05

134.03

131.12

131.06

129.25

115.05

114.88

77.26

77.00

76.75

60.43

23.20

22.52

14.16

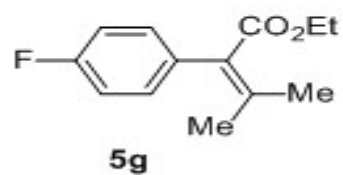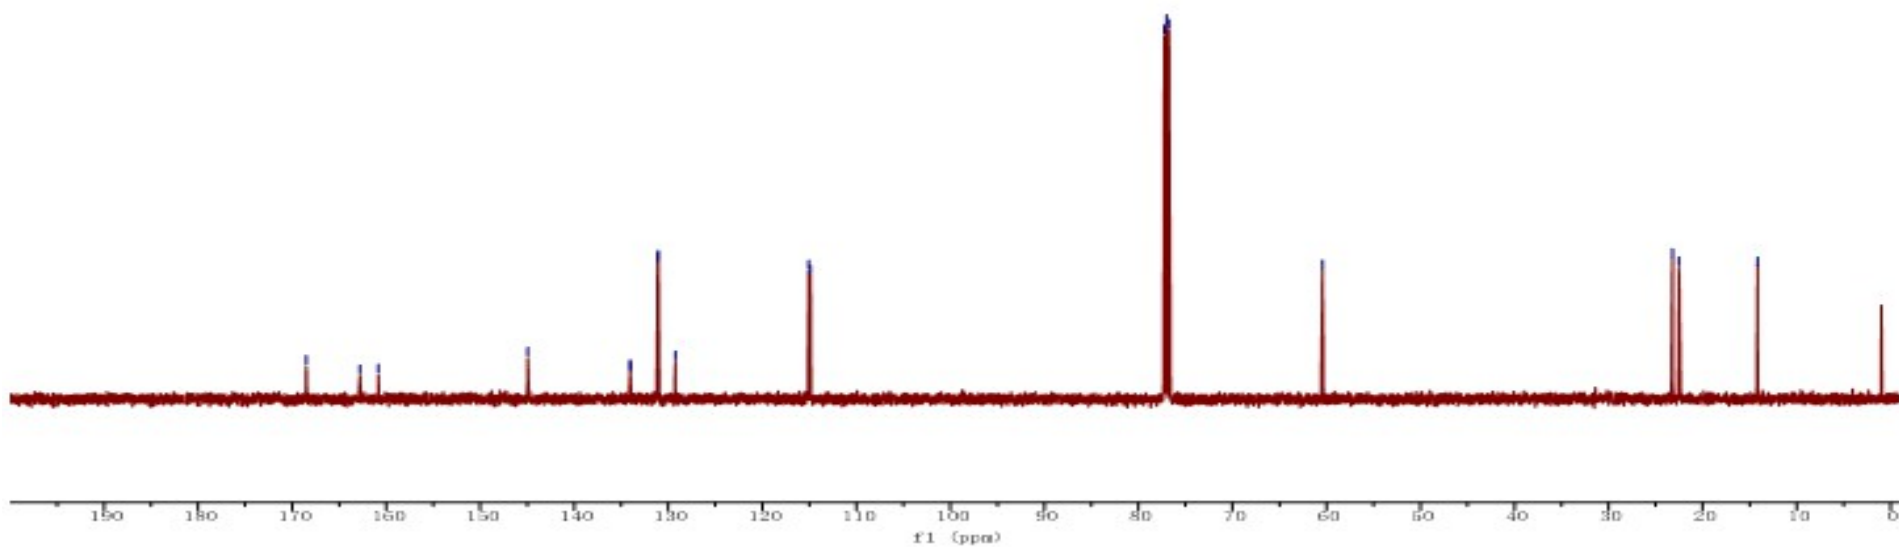

Jun23-2022, 332, f1d

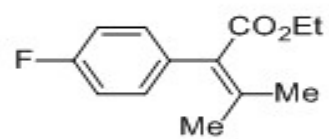

5g

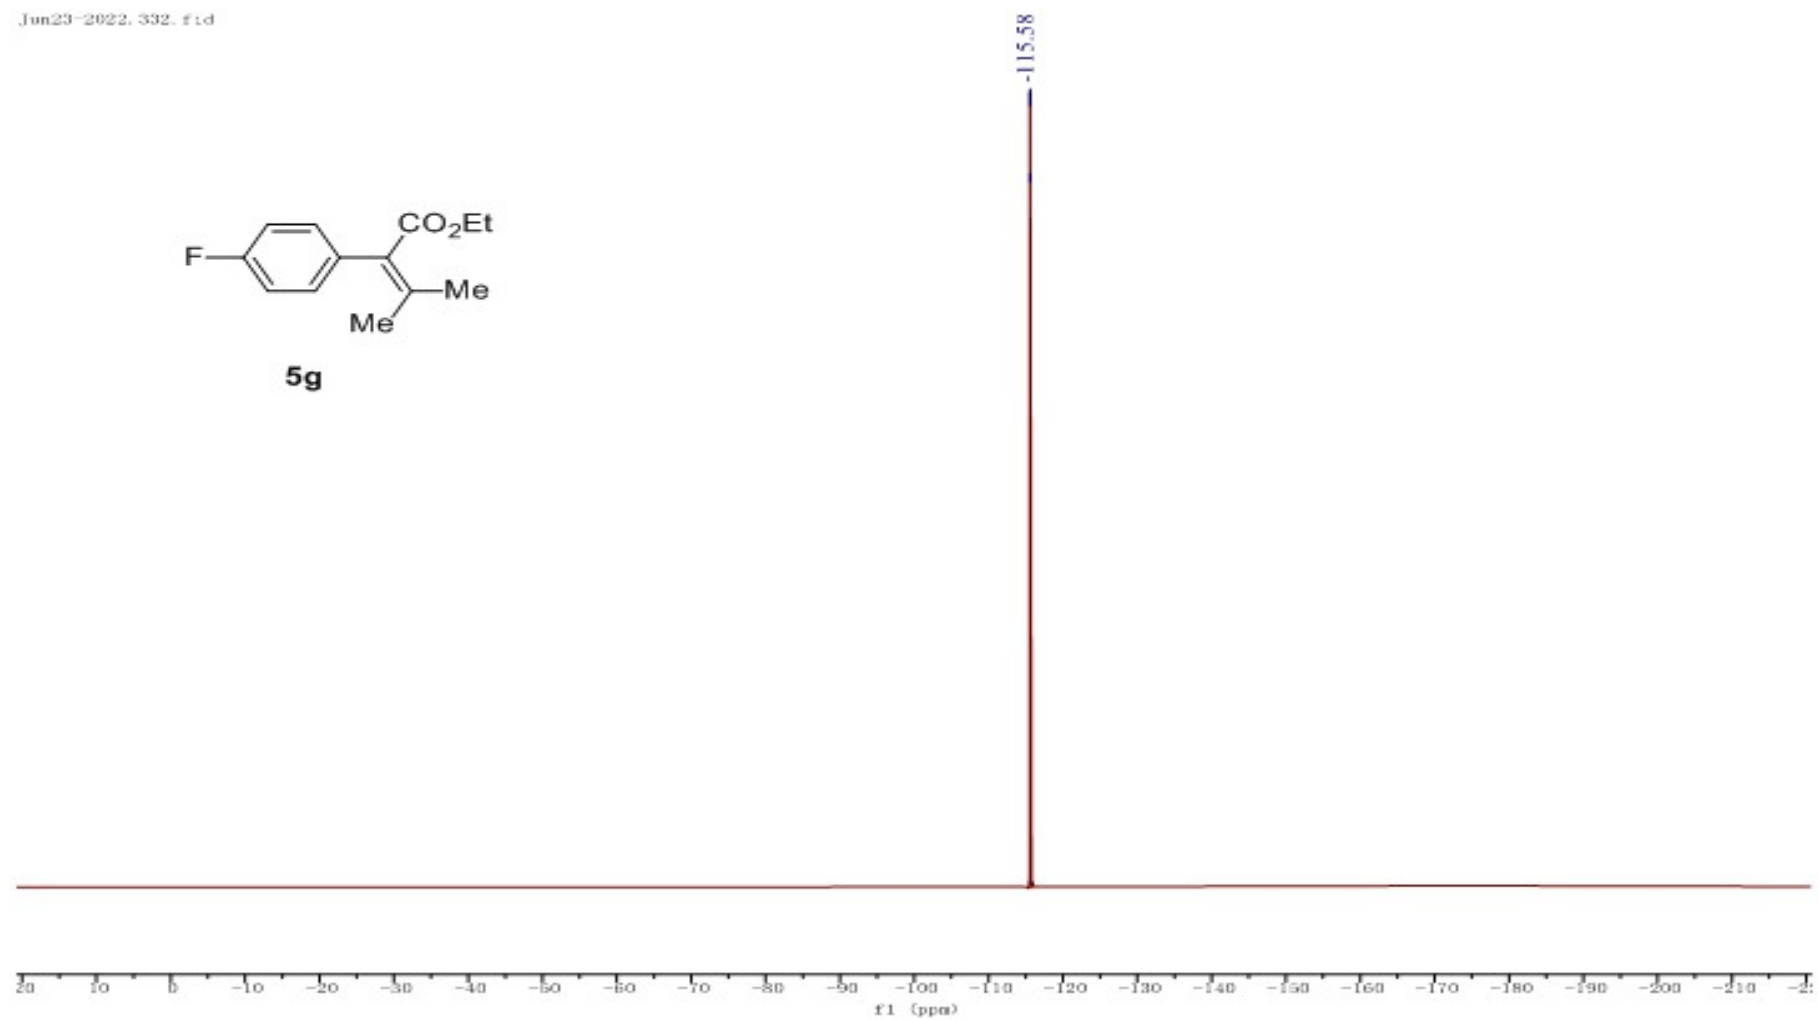

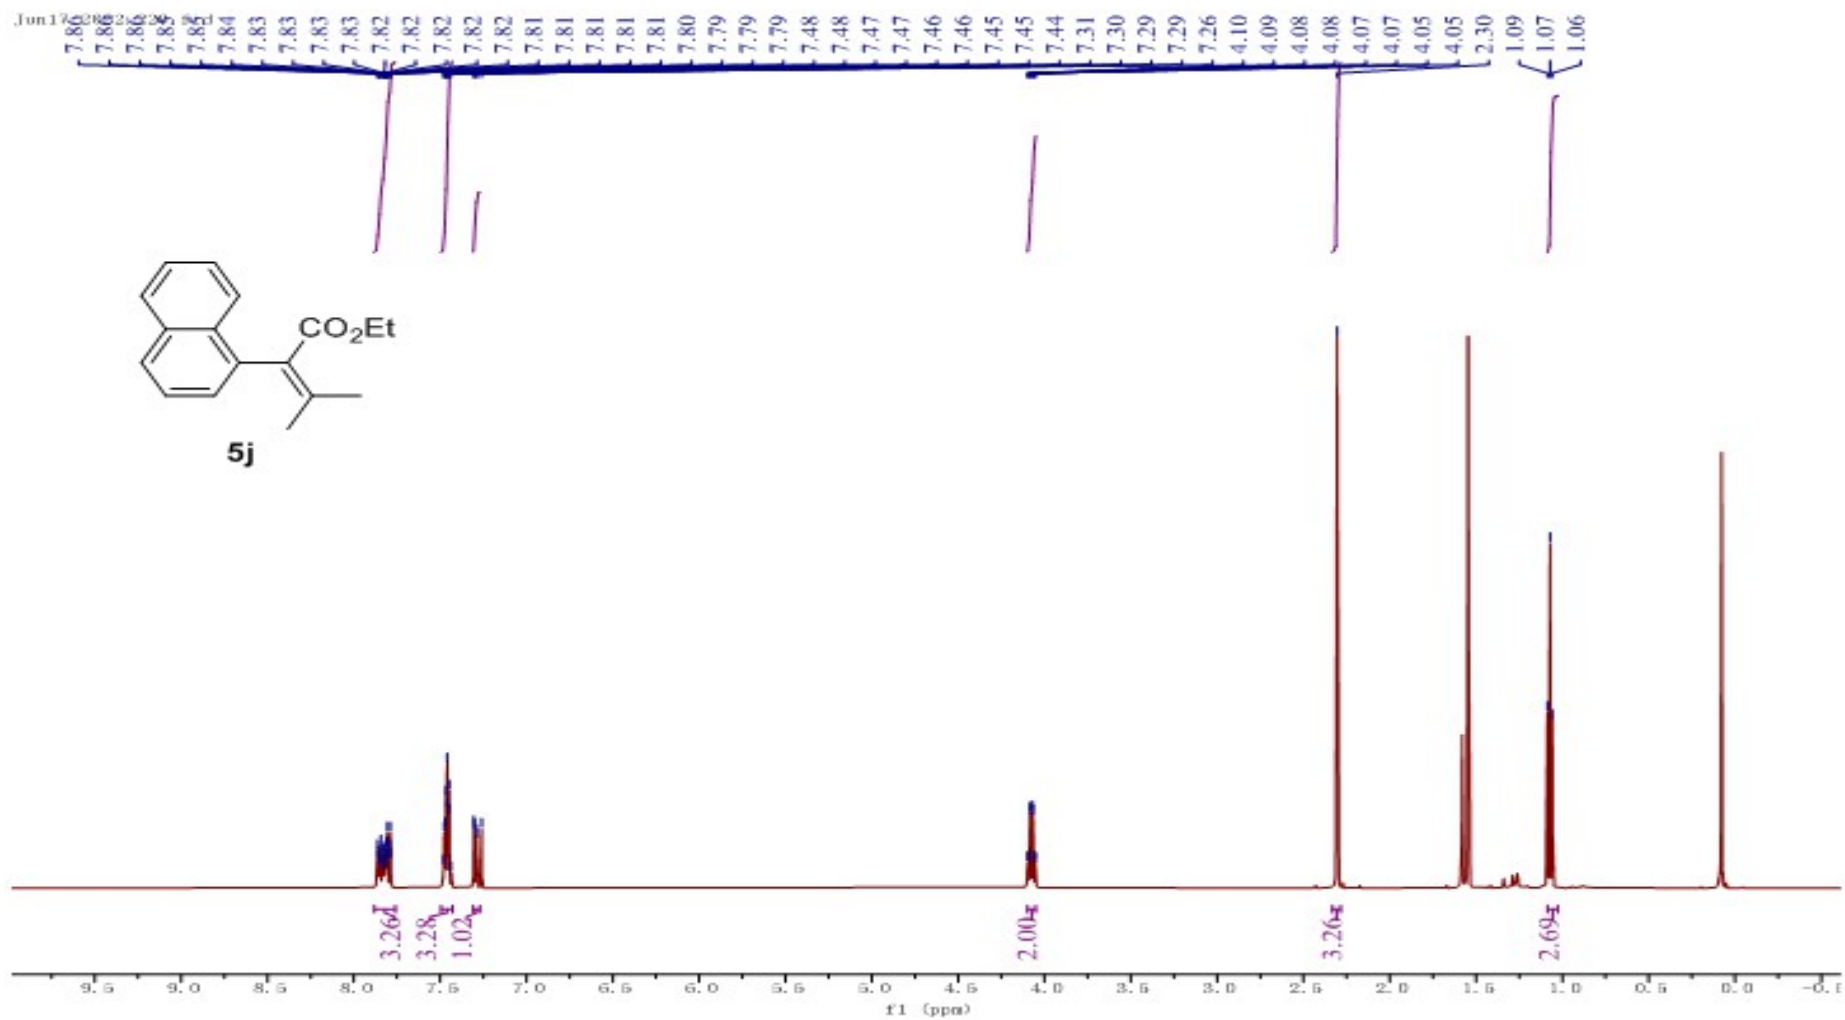

Jun17-2022\_221.fid

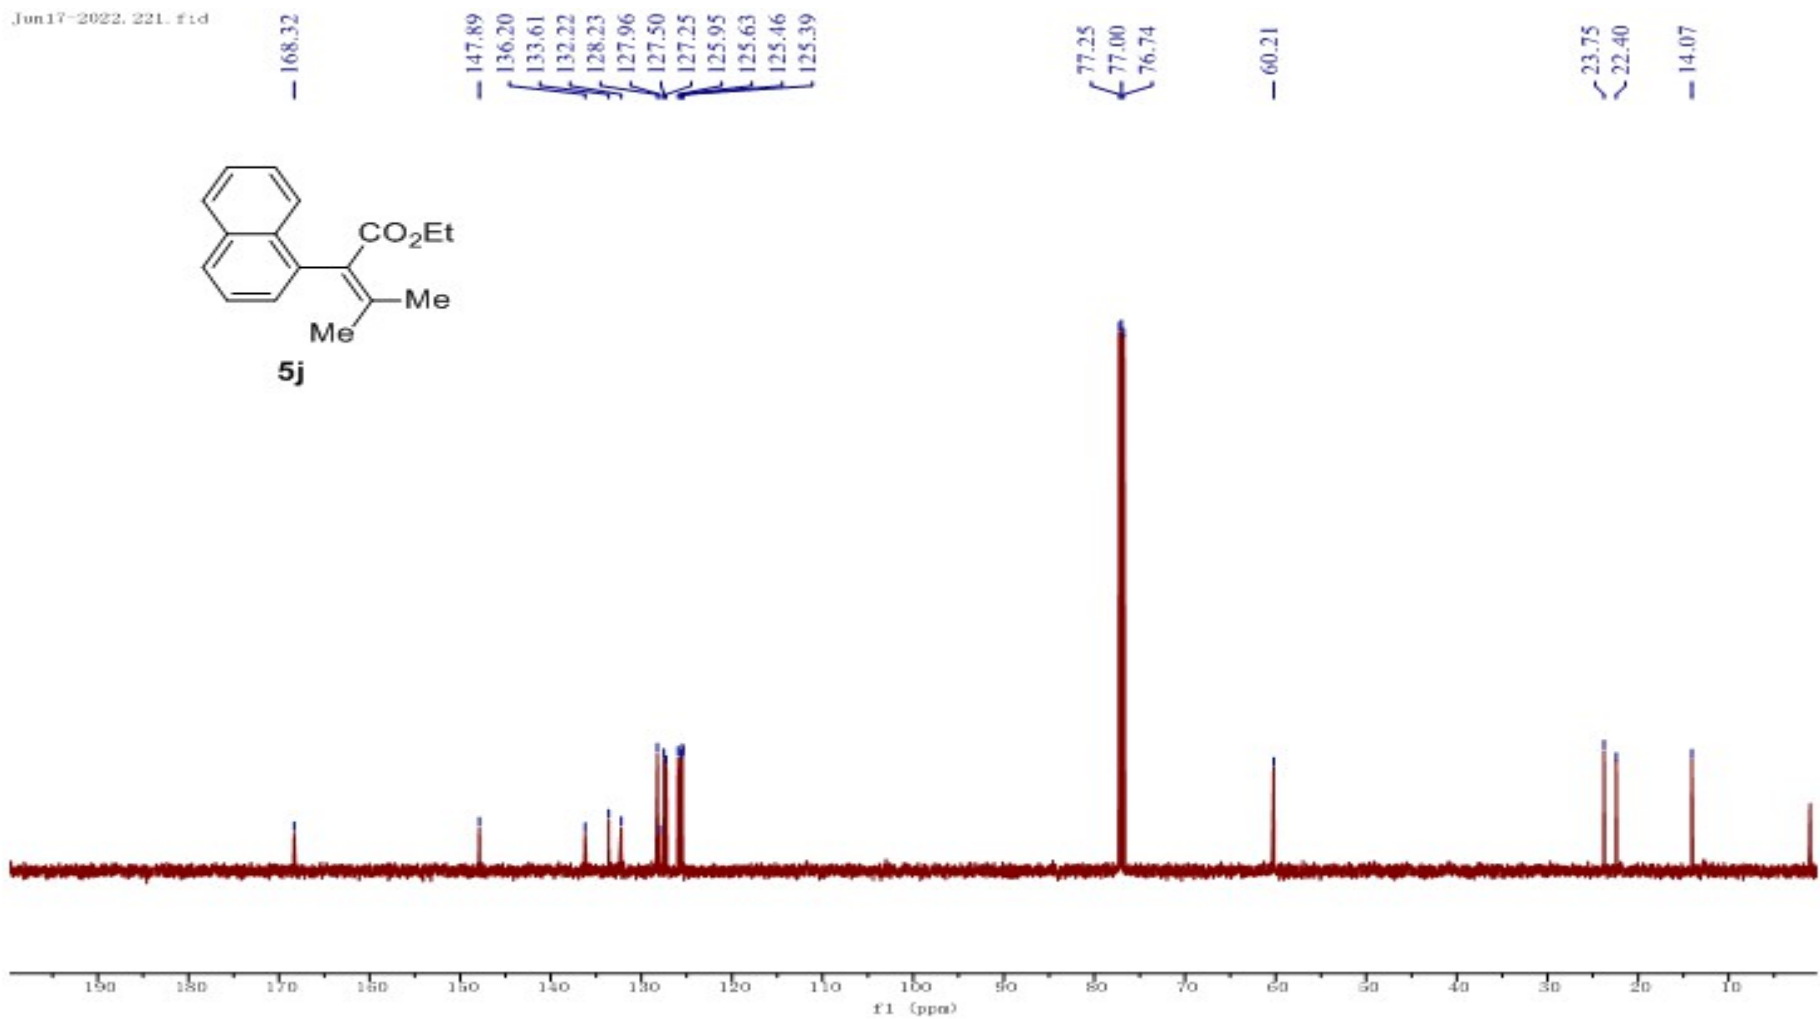

Jun23-2022\_340.f1d

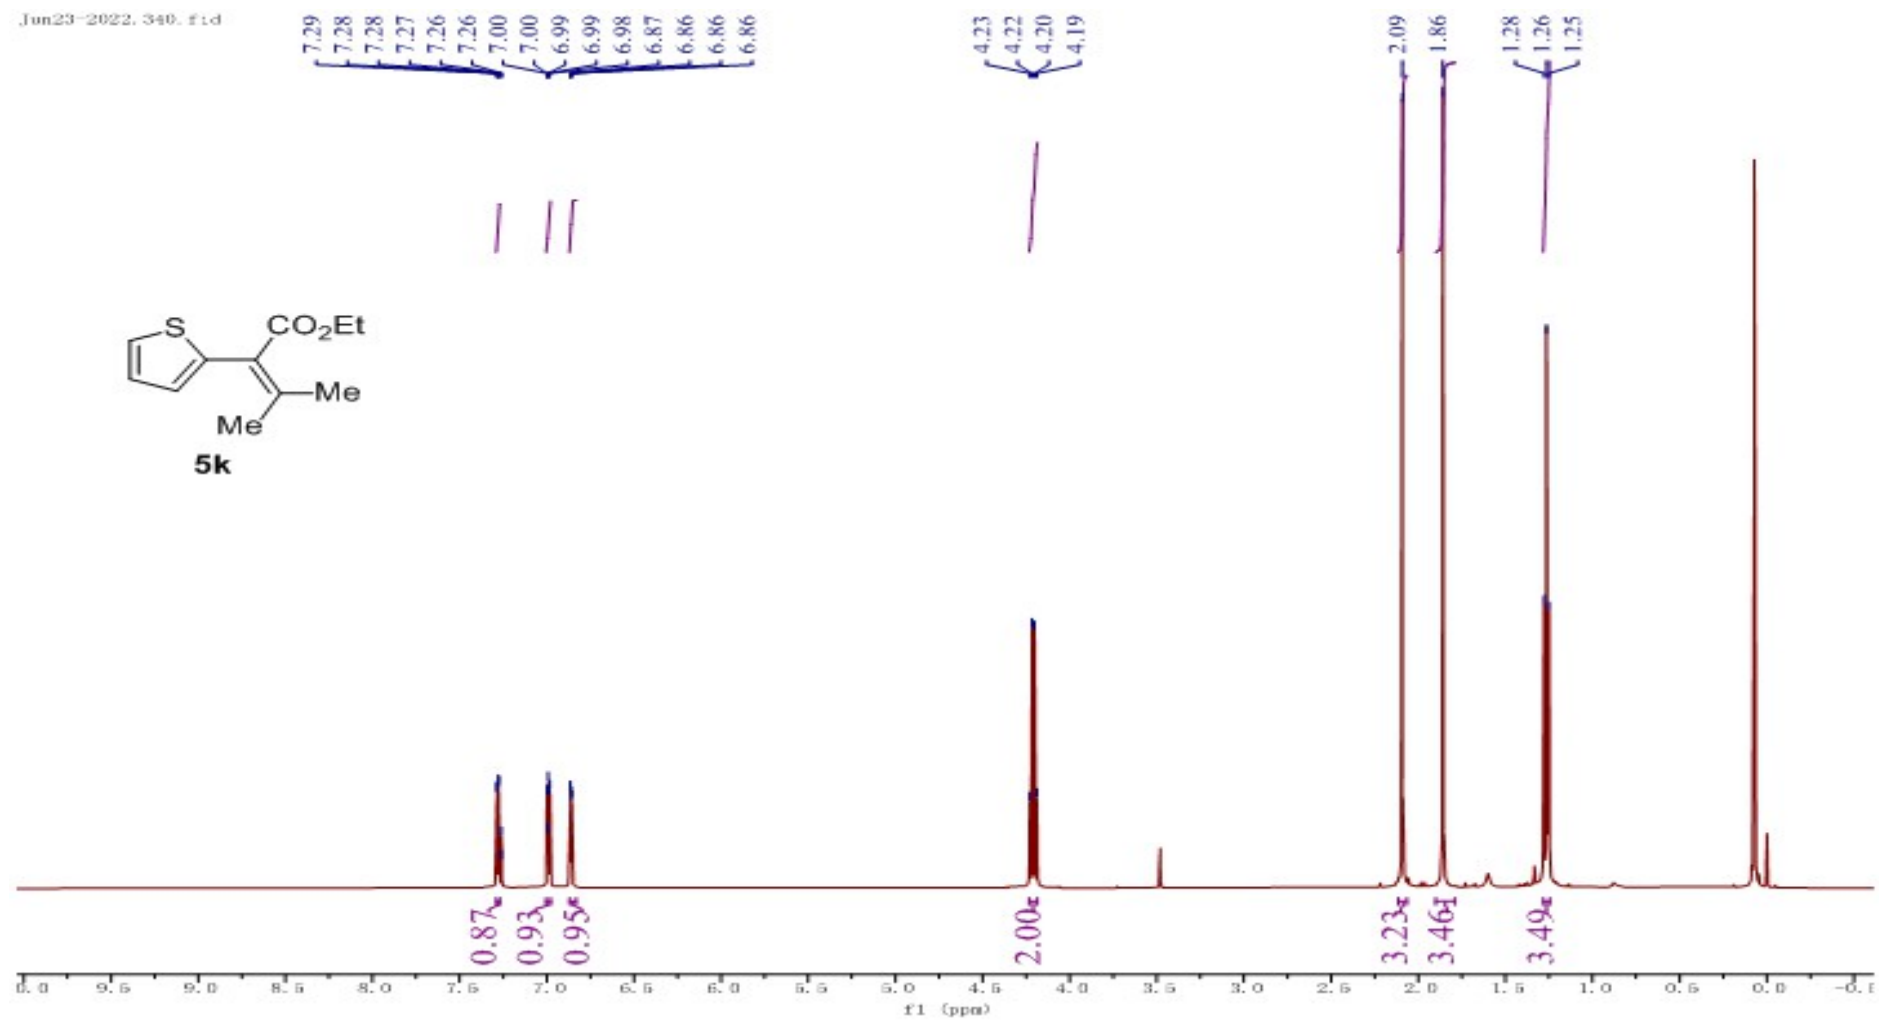

Jun23-2022\_341.fid

168.20  
146.00  
138.51  
127.24  
126.47  
125.48  
123.57  
77.25  
77.00  
76.74  
60.74  
23.26  
22.89  
14.14

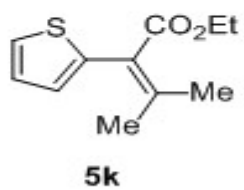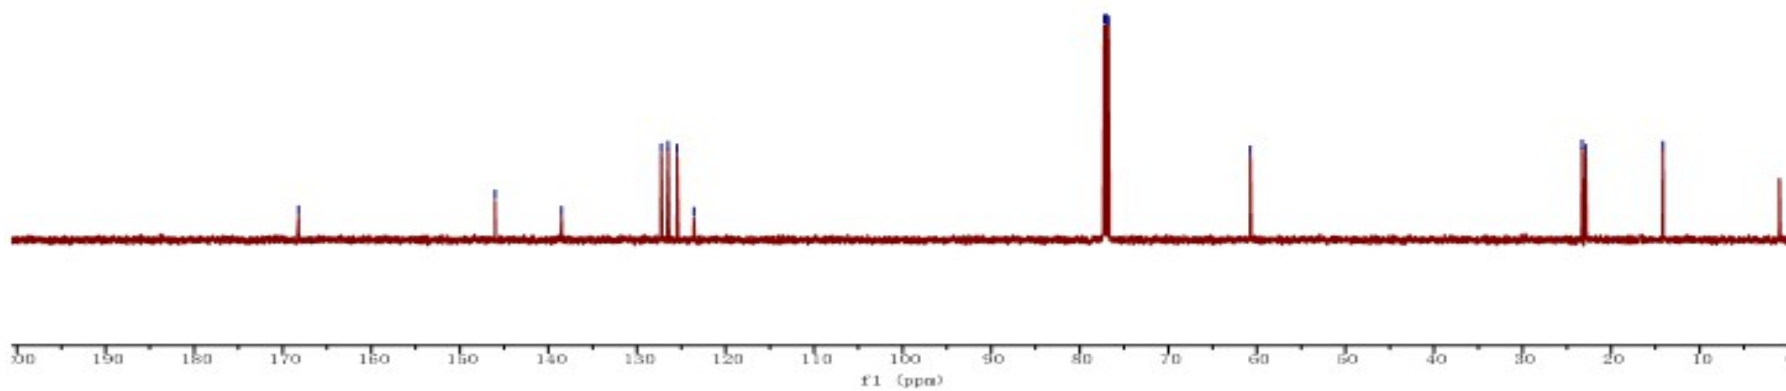



Jun30-2022. 360

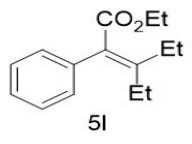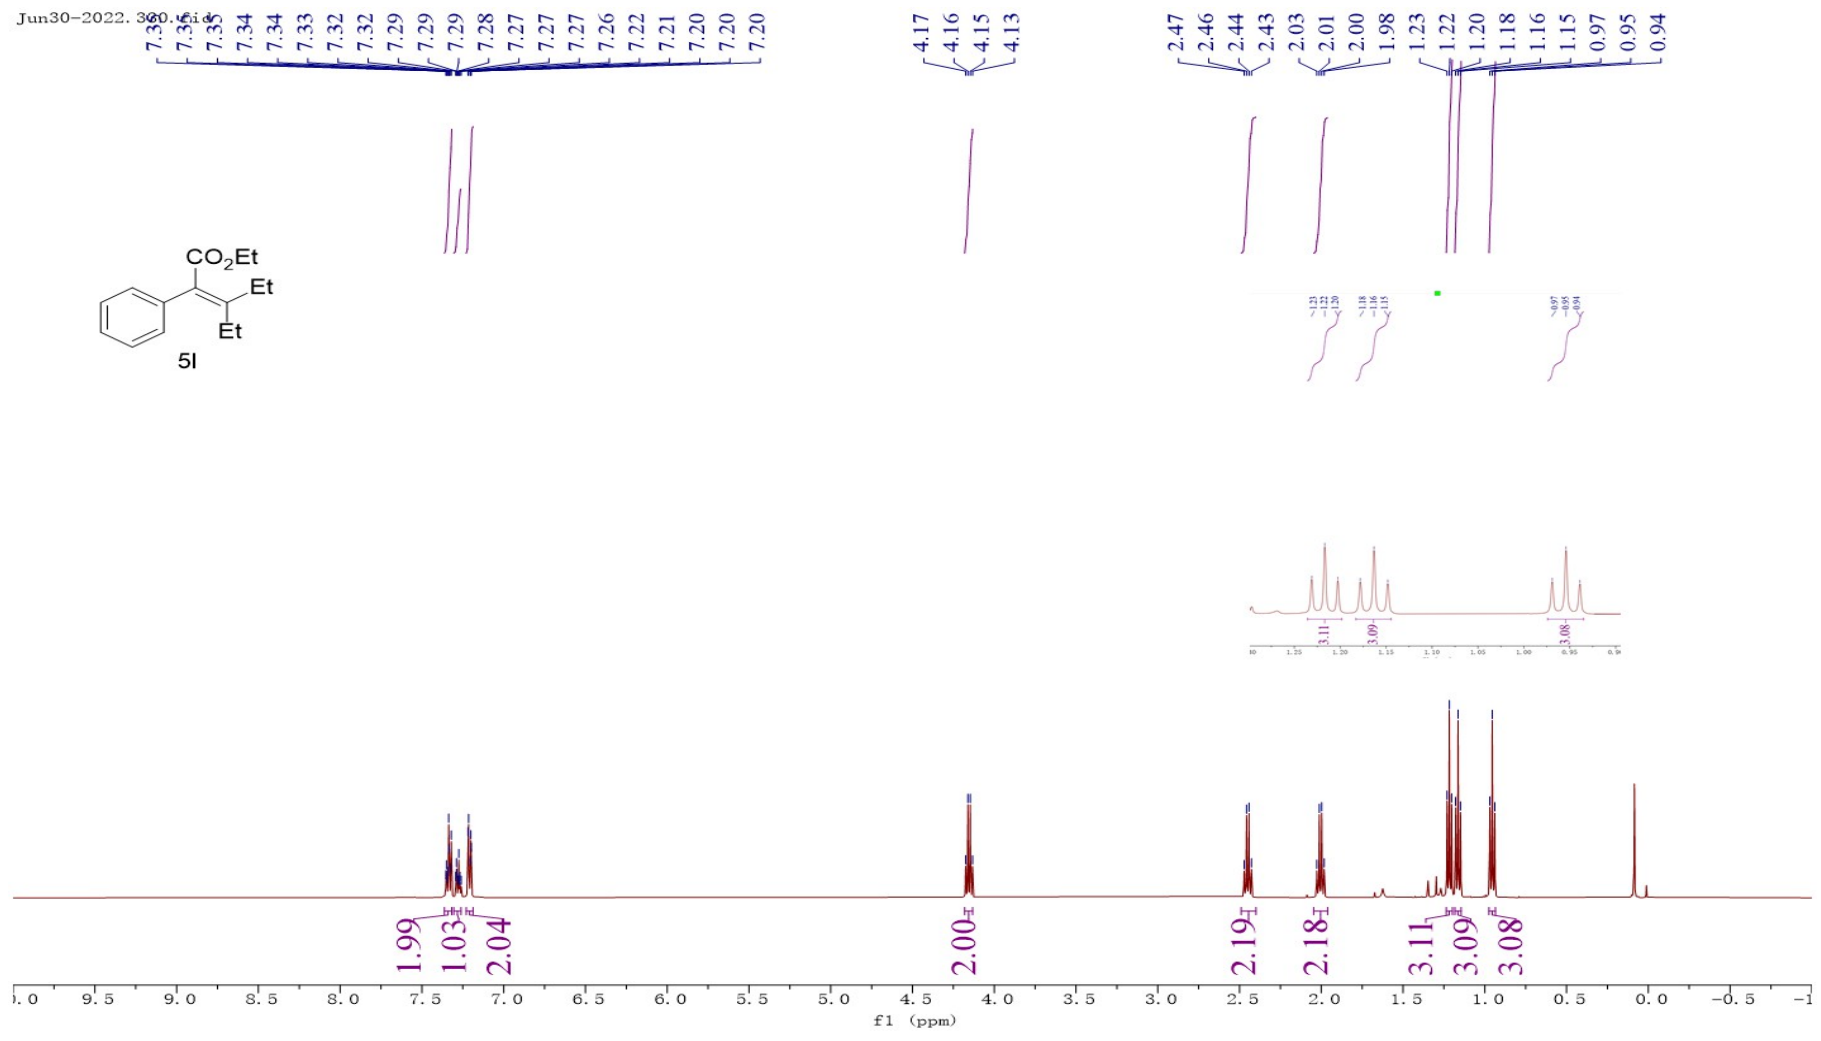

Jun30-2022\_331.fid

168.83

153.46

137.93

129.88

129.29

128.02

126.90

77.26

77.00

76.75

60.33

25.64

14.13

13.32

12.73

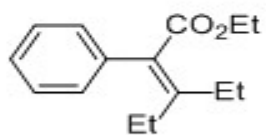

5I

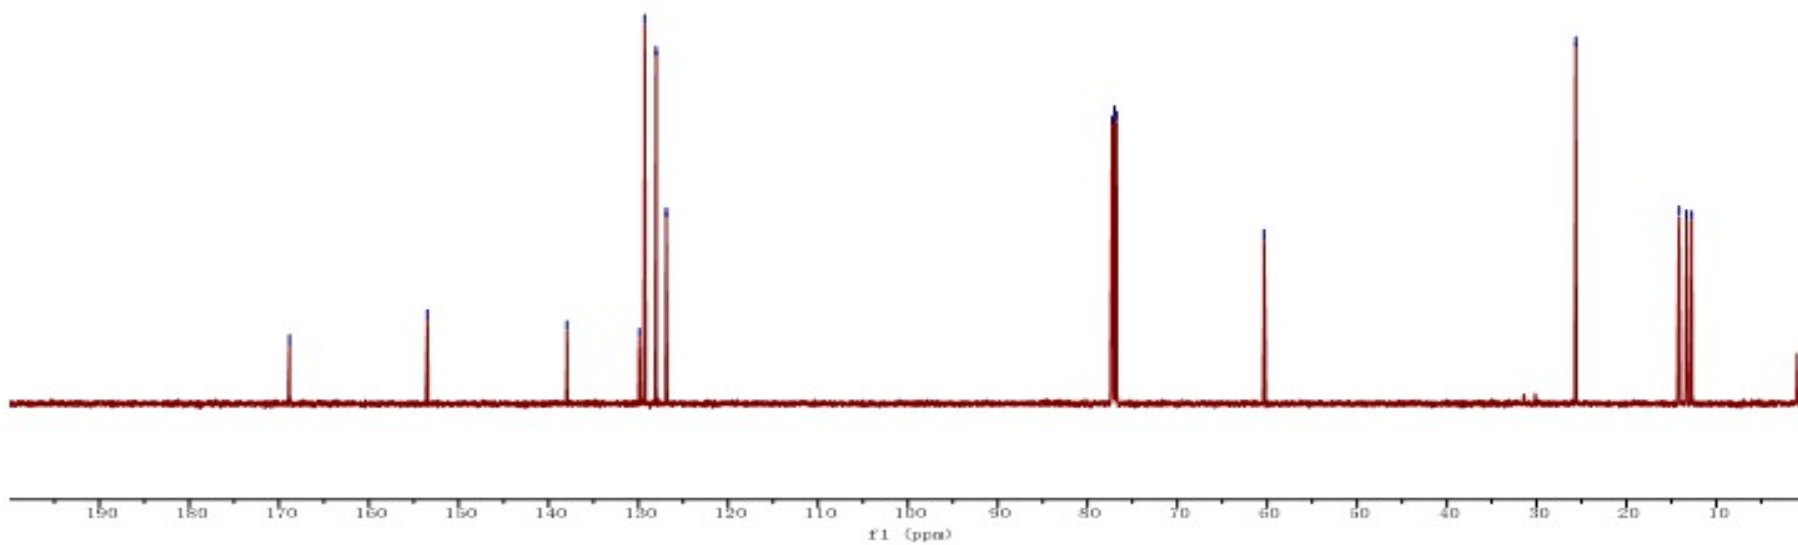

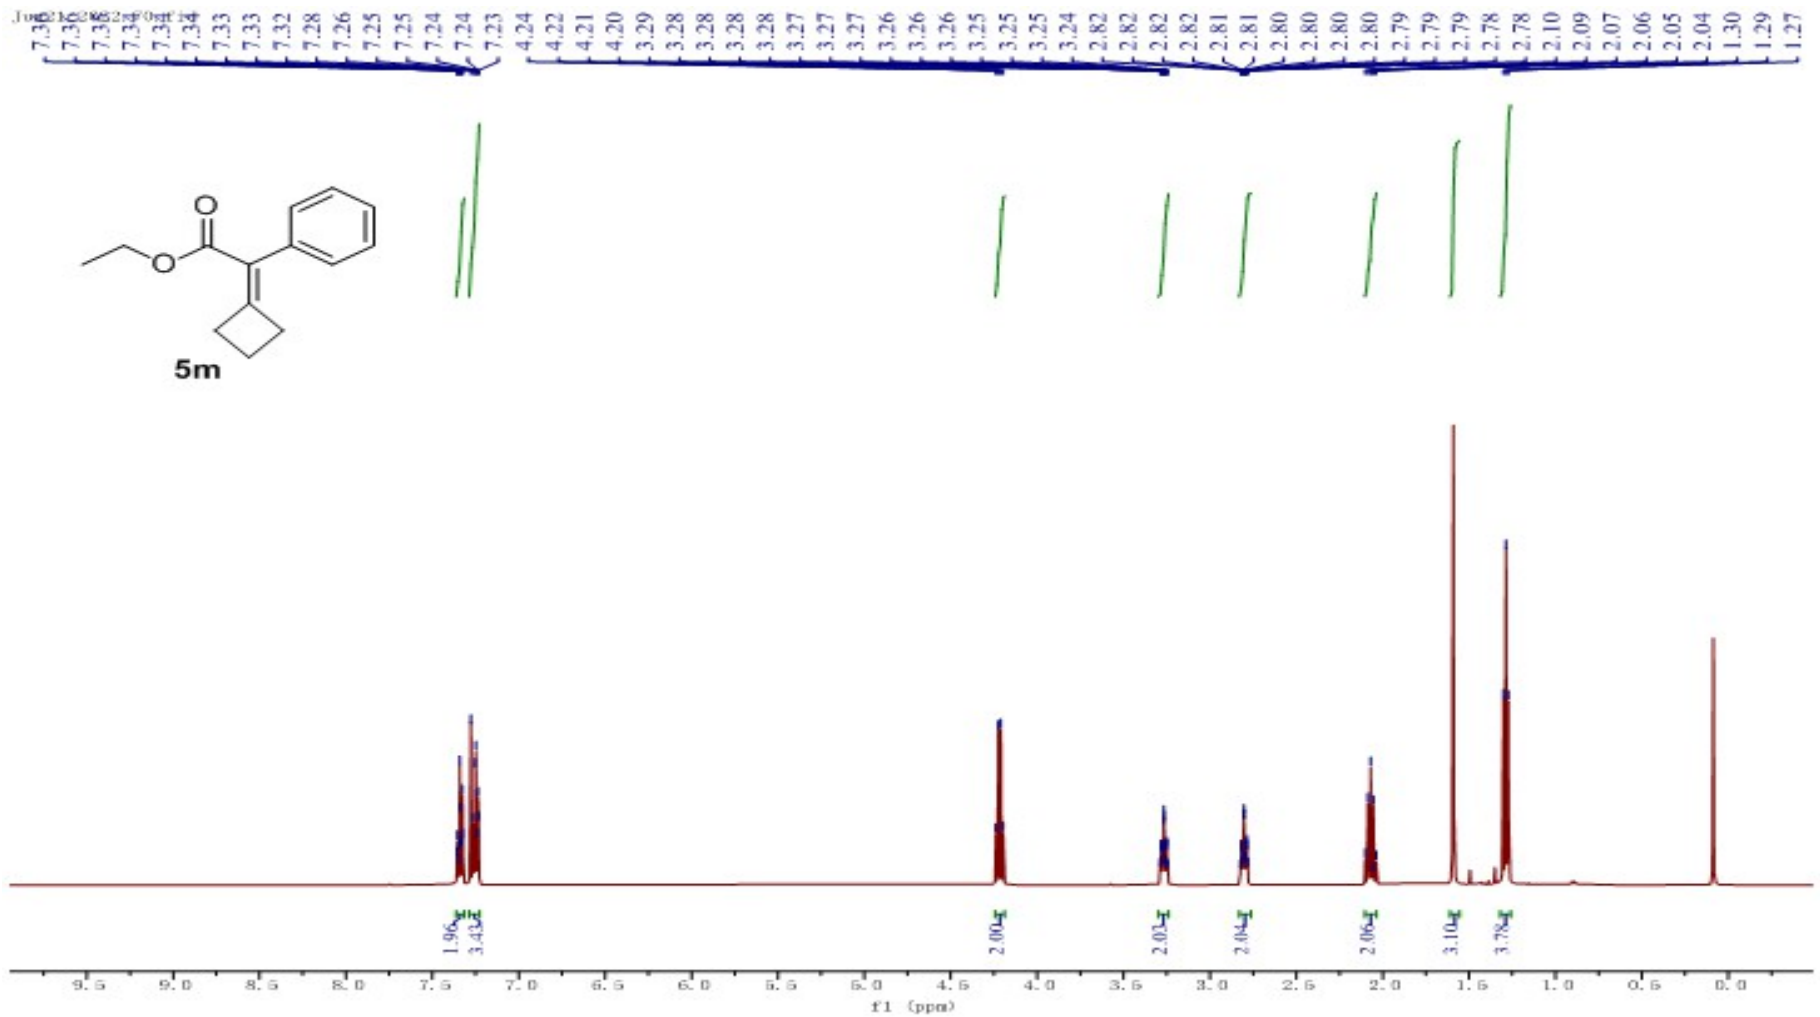

Jun21-2022\_71.fid

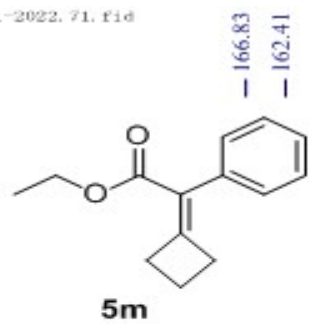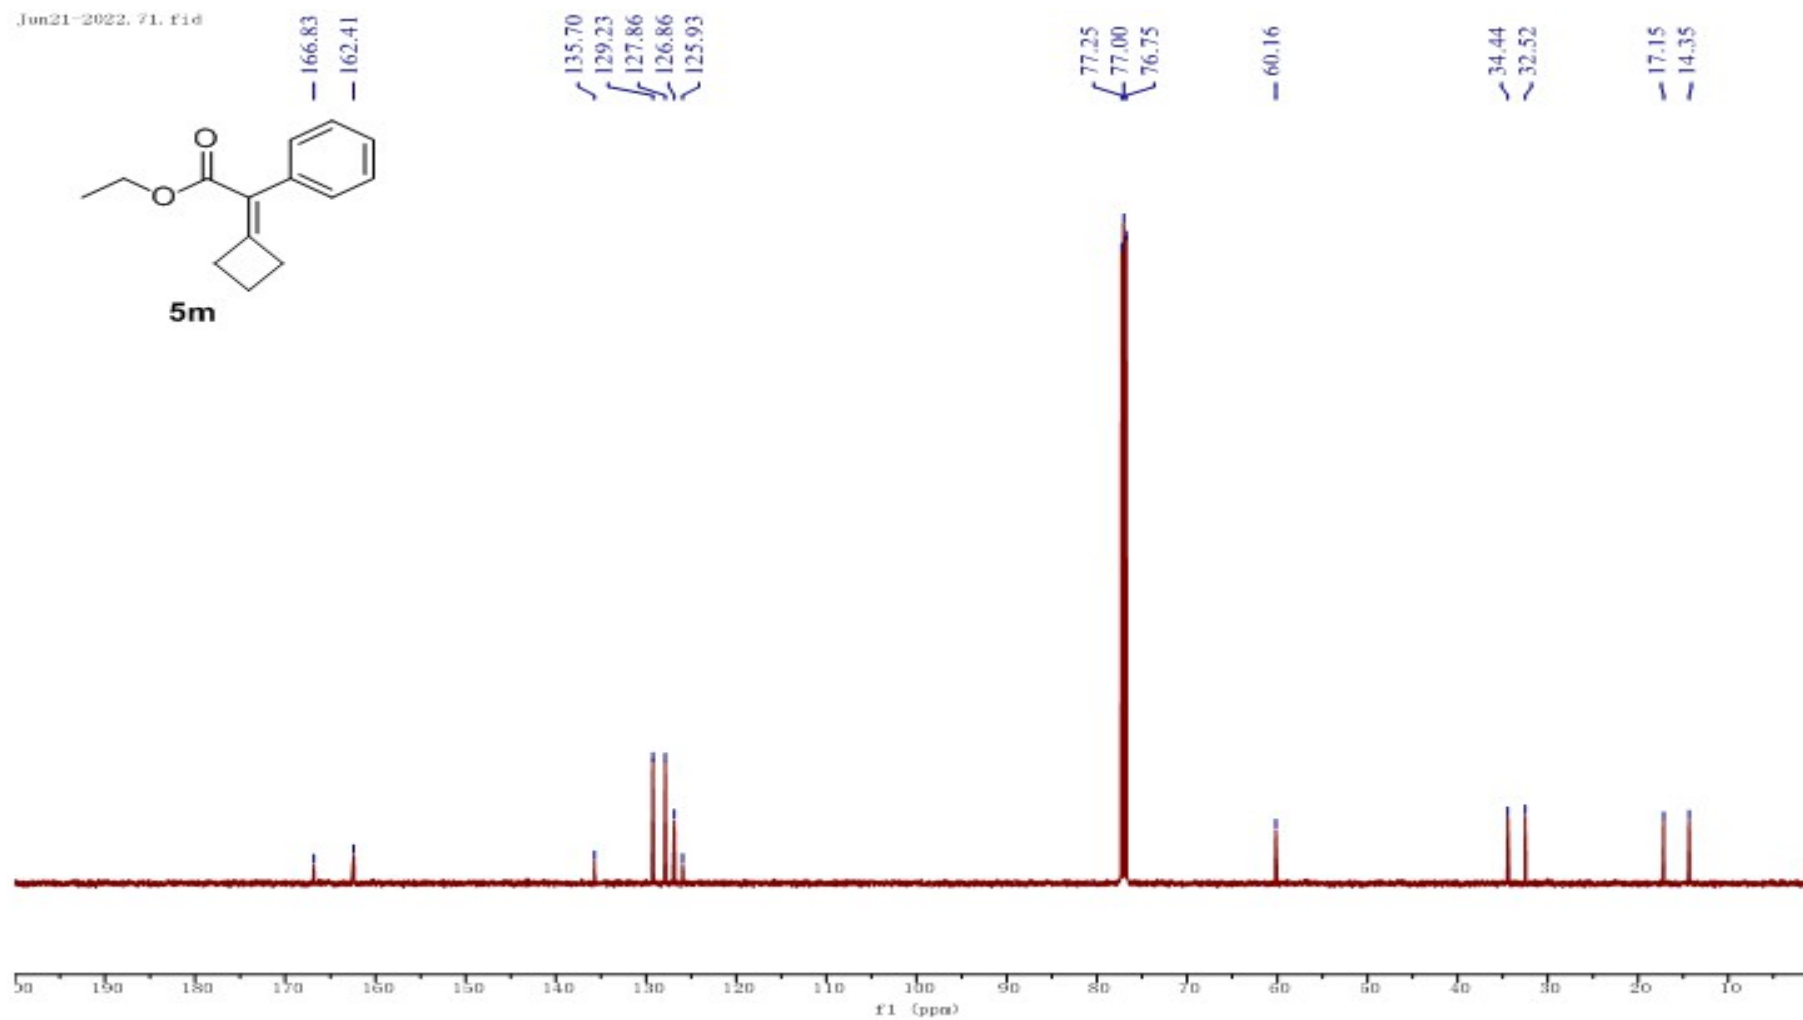

Jun21-2022, 180, f1

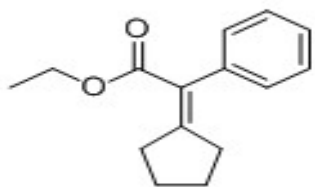

5n

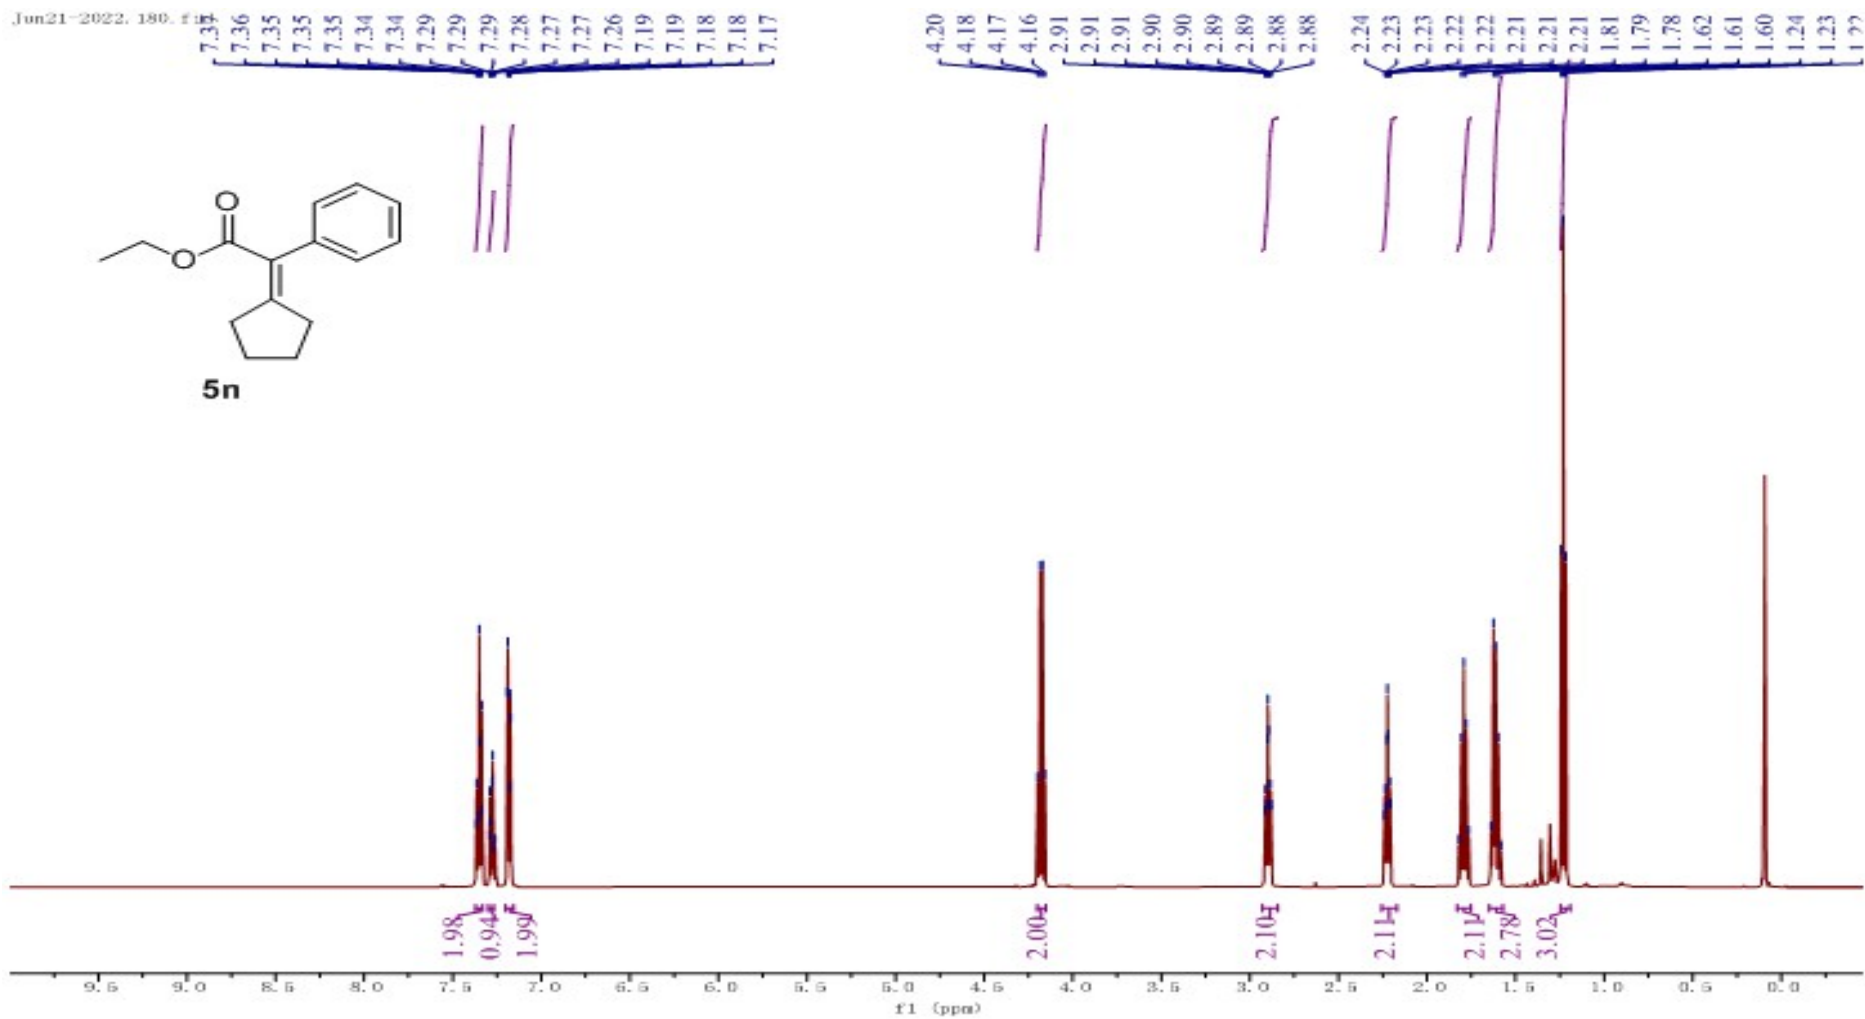

Jun21-2022\_181.fid

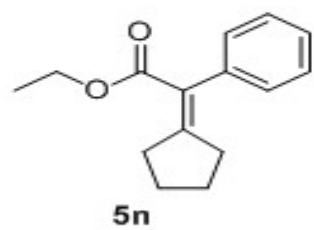

167.51  
162.80

139.07  
129.23  
127.98  
126.66  
125.79

77.25  
77.00  
76.75

60.06

35.24  
34.03  
26.75  
25.82

14.27

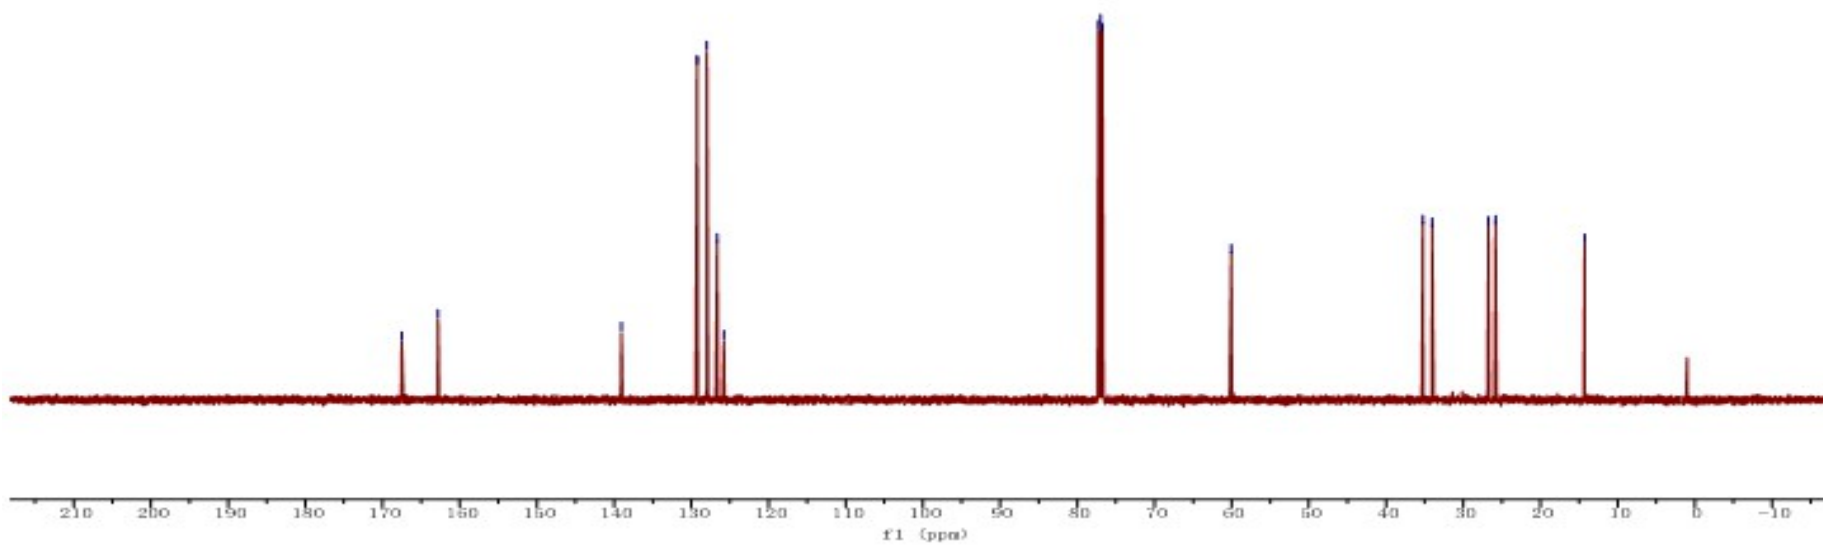

课题2数据\_150.fid

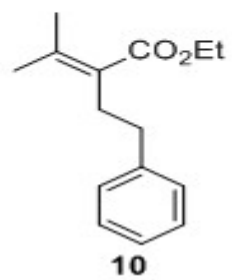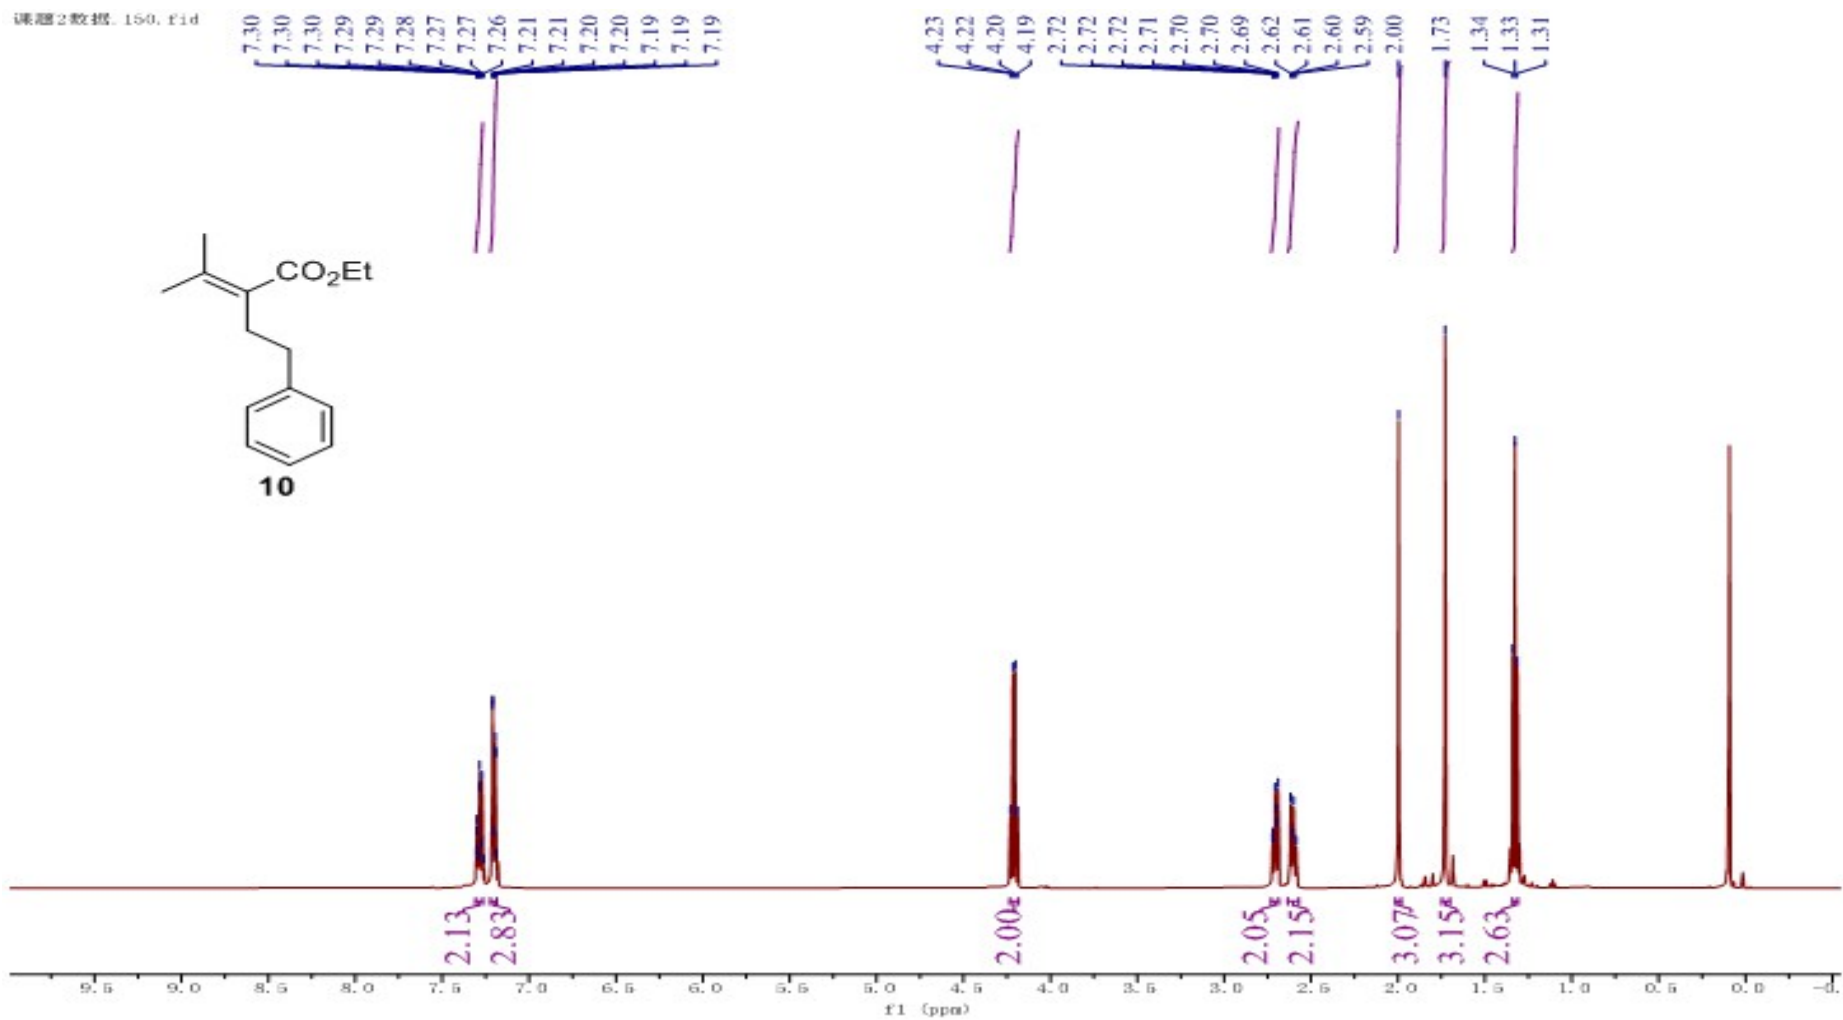

课题2数据\_151.fid

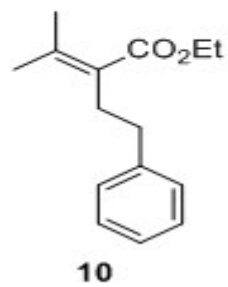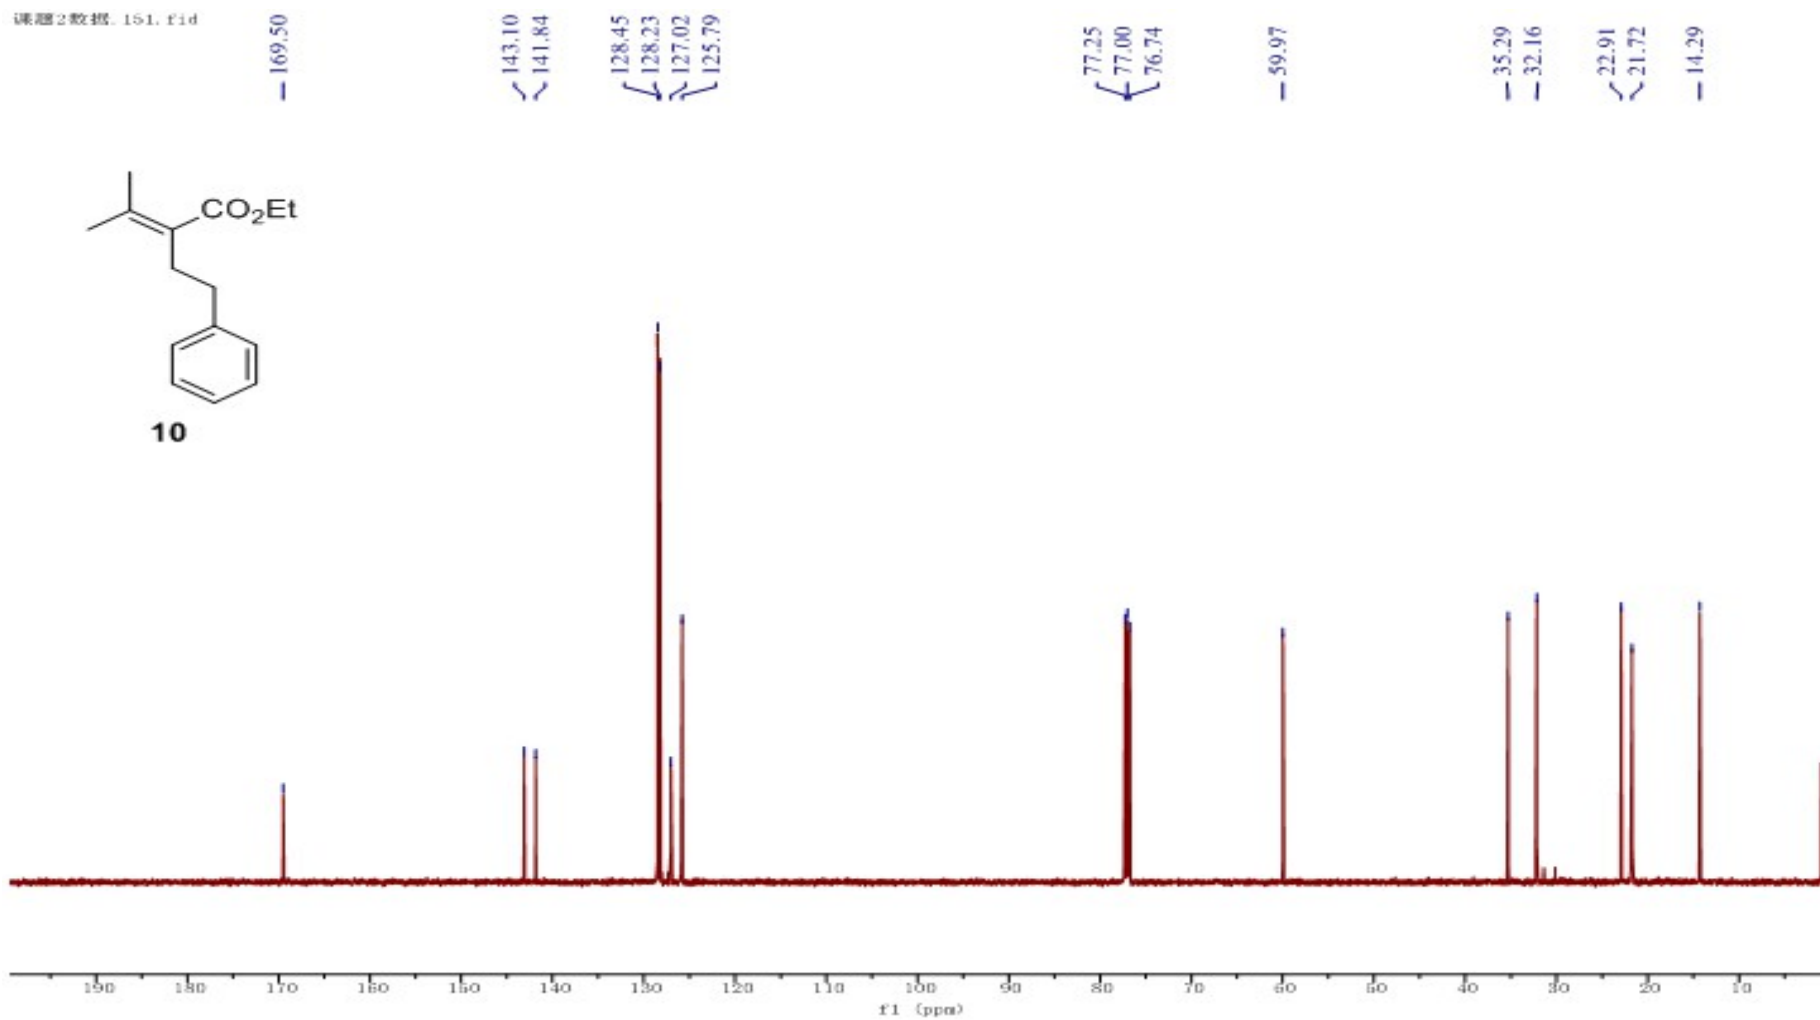

Supplement: d3ra00401e1.pdf [file d3ra00401e1.pdf]
